# Supplementary material for: Computational characterization of enzyme-bound thiamin diphosphate reveals a surprisingly stable tricyclic state: implications for catalysis
Source: PubMed Central journal article supplement (PMC6350894; doi:10.3762/bjoc.15.15), 2019-01-16
Supplement: Beilstein_J_Org_Chem-15-145-s001.pdf [file Beilstein_J_Org_Chem-15-145-s001.pdf]

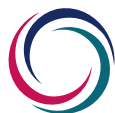

## Supporting Information

for

### **Computational characterization of enzyme-bound thiamin diphosphate reveals a surprisingly stable tricyclic state: implications for catalysis**

Ferran Planas, Michael J. McLeish and Fahmi Himo

*Beilstein J. Org. Chem.* **2019**, *15*, 145–159. [doi:10.3762/bjoc.15.15](https://doi.org/10.3762/bjoc.15.15)

**Lowest-energy conformation of model A, superpositions of the AP state/model C and APH<sup>+</sup> state/model E with crystal structures, superposition of the AP state/models B and C, superposition of the AP states/models D and E, experimental CD spectra, calculated energies and energy corrections, and Cartesian coordinates of all optimized structures**

## Table of Contents

|                                                                                                 |     |
|-------------------------------------------------------------------------------------------------|-----|
| 1. Lowest-energy structure of the cofactor alone .....                                          | S2  |
| 2. Superposition of <b>AP</b> state in <b>Model C</b> with crystal structure .....              | S3  |
| 3. Superposition of <b>APH<sup>+</sup></b> state in <b>Model E</b> with crystal structure ..... | S4  |
| 4. Superposition of the <b>AP</b> states for <b>Models B</b> and <b>C</b> .....                 | S5  |
| 5. Superposition of the <b>AP</b> states for <b>Models D</b> and <b>E</b> .....                 | S6  |
| 6. Experimental CD spectra.....                                                                 | S7  |
| 7. Energy decomposition of the calculated stationary points .....                               | S8  |
| 8. Cartesian coordinates of optimized structures .....                                          | S10 |

## 1. Lowest-energy structure of the cofactor alone

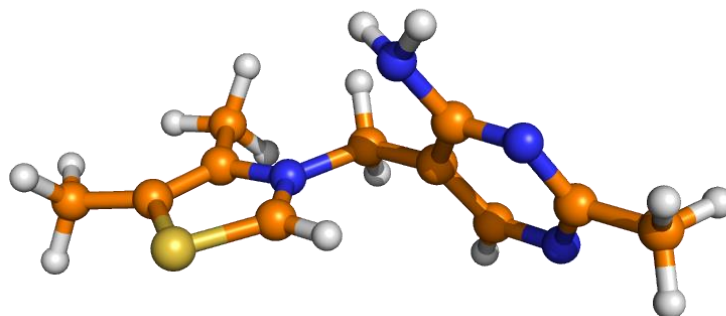

**Figure S1:** *Lowest-energy conformation of the cofactor alone in solution (Model A). This structure is calculated to be 4.2 kcal/mol lower in energy than the typical V-shape of the AP state shown in Figure 2 in the main text.*

## 2. Superposition of AP state in Model C with crystal structure

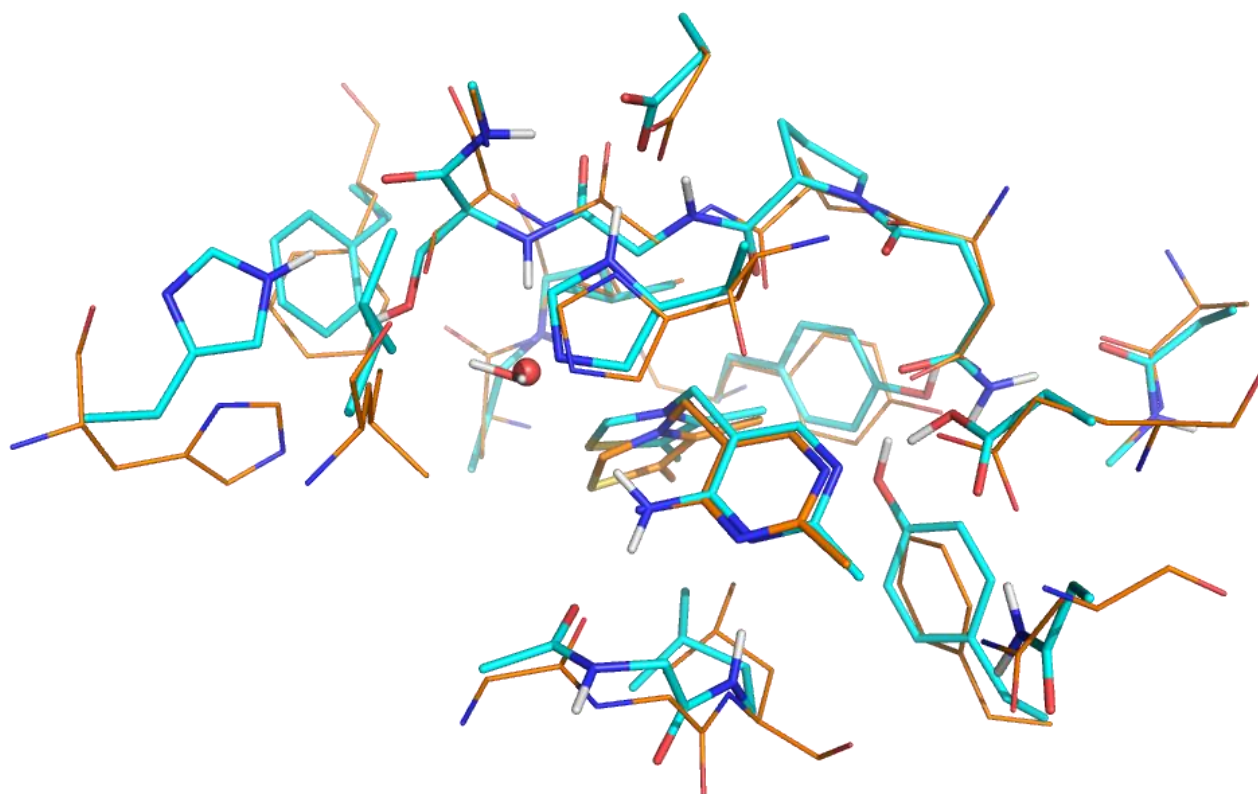

*Figure S2: Residues colored in orange and the water represented as a sphere correspond to the crystal structure containing the crystallographic water (PDB 1BFD). Residues in turquoise and the water represented with lines correspond to the AP state of **Model C**.*

### 3. Superposition of APH<sup>+</sup> state in Model E with crystal structure

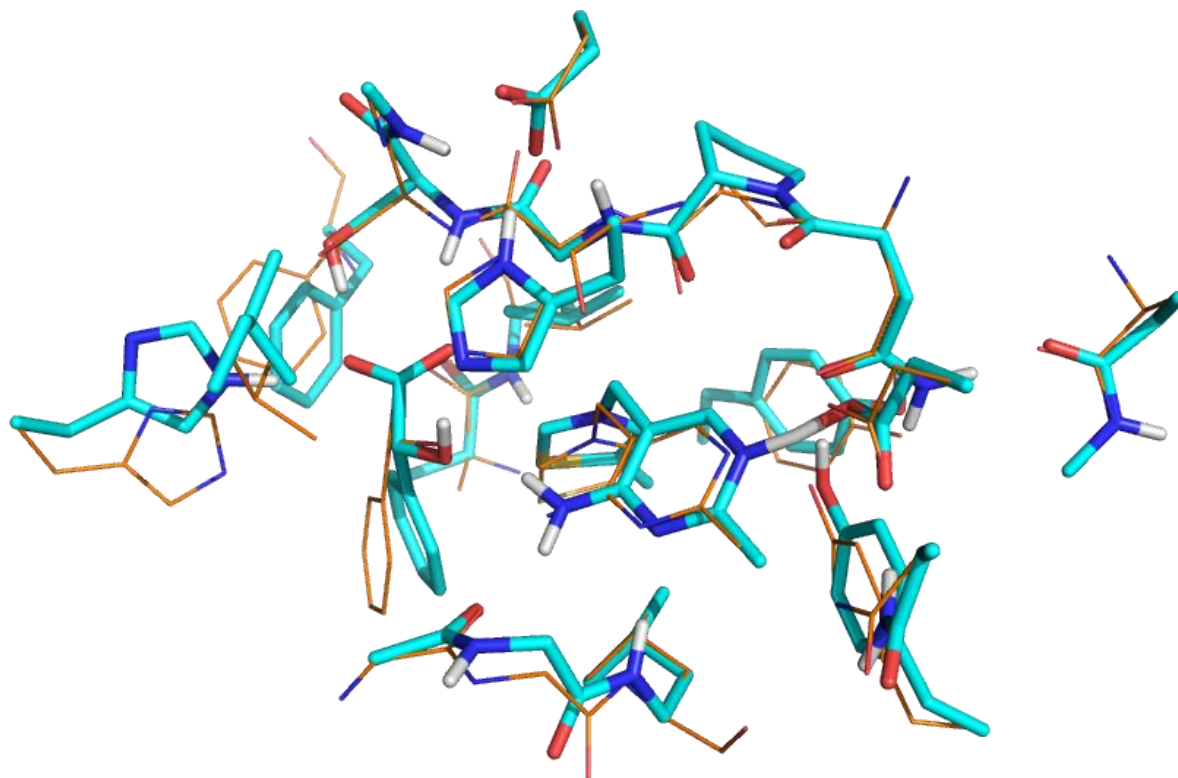

**Figure S3:** Residues colored in orange correspond to the crystal structure containing R-Mandelate (PDB 1MCZ), while residues colored in turquoise correspond to the APH<sup>+</sup> state of Model E.

#### 4. Superposition of the AP states for Models B and C

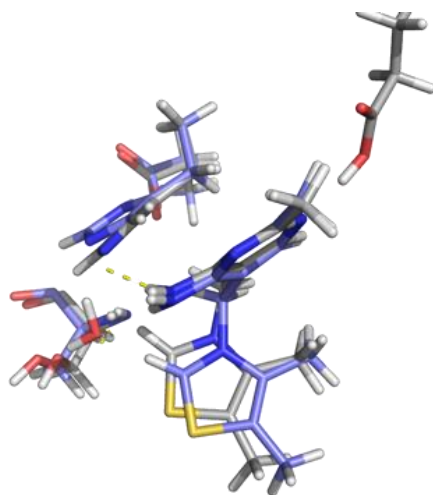

**Figure S4:** Superposition of the AP states of **Model B** representing the empty cavity (grey color) with **Model C** that includes the crystallographic water (blue color).

## 5. Superposition of the AP states for Models D and E

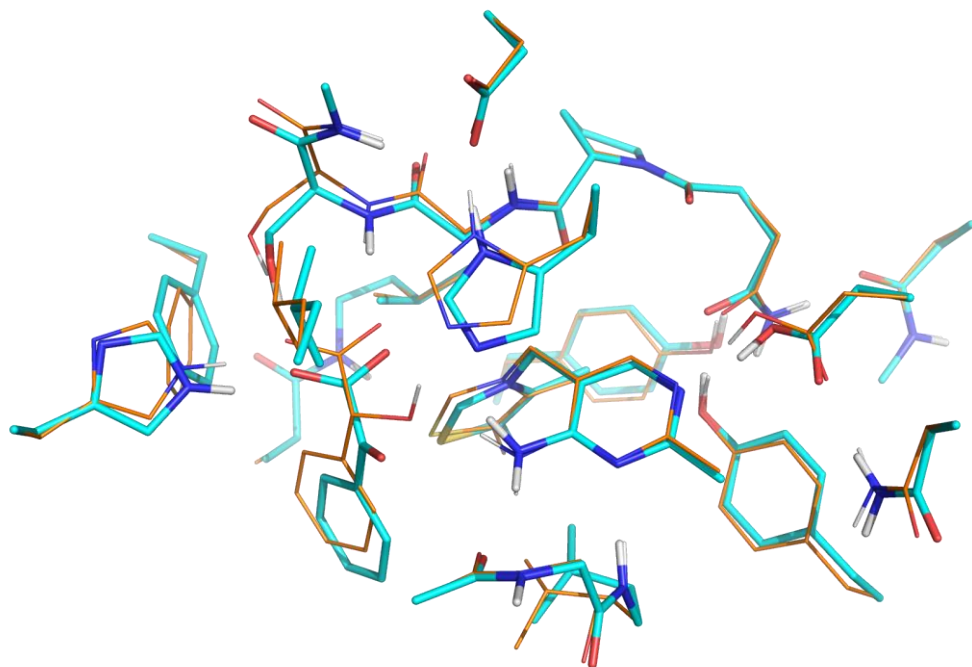

*Figure S5: Superposition of the AP states of Model D representing the active site with benzoylformate substrate (blue color) with Model E that includes the (R)-mandelate inhibitor (orange color).*

## 6. Experimental CD spectra

Aliquots of (*R*)-mandelate or methyl benzoyl phosphonate (MBP) were added to BFDC (2.0 mg/mL, 35  $\mu$ M concentration of active centers) in 20 mM  $\text{KH}_2\text{PO}_4$  (pH 6.5), containing  $\text{MgCl}_2$  (2.5 mM) and ThDP (0.50 mM). The CD spectra were recorded in the near-UV region using a Jasco J-810 circular dichroism spectropolarimeter. Difference spectra were obtained by subtraction of the spectrum of BFDC in the absence of ligand using SigmaPlot 12.

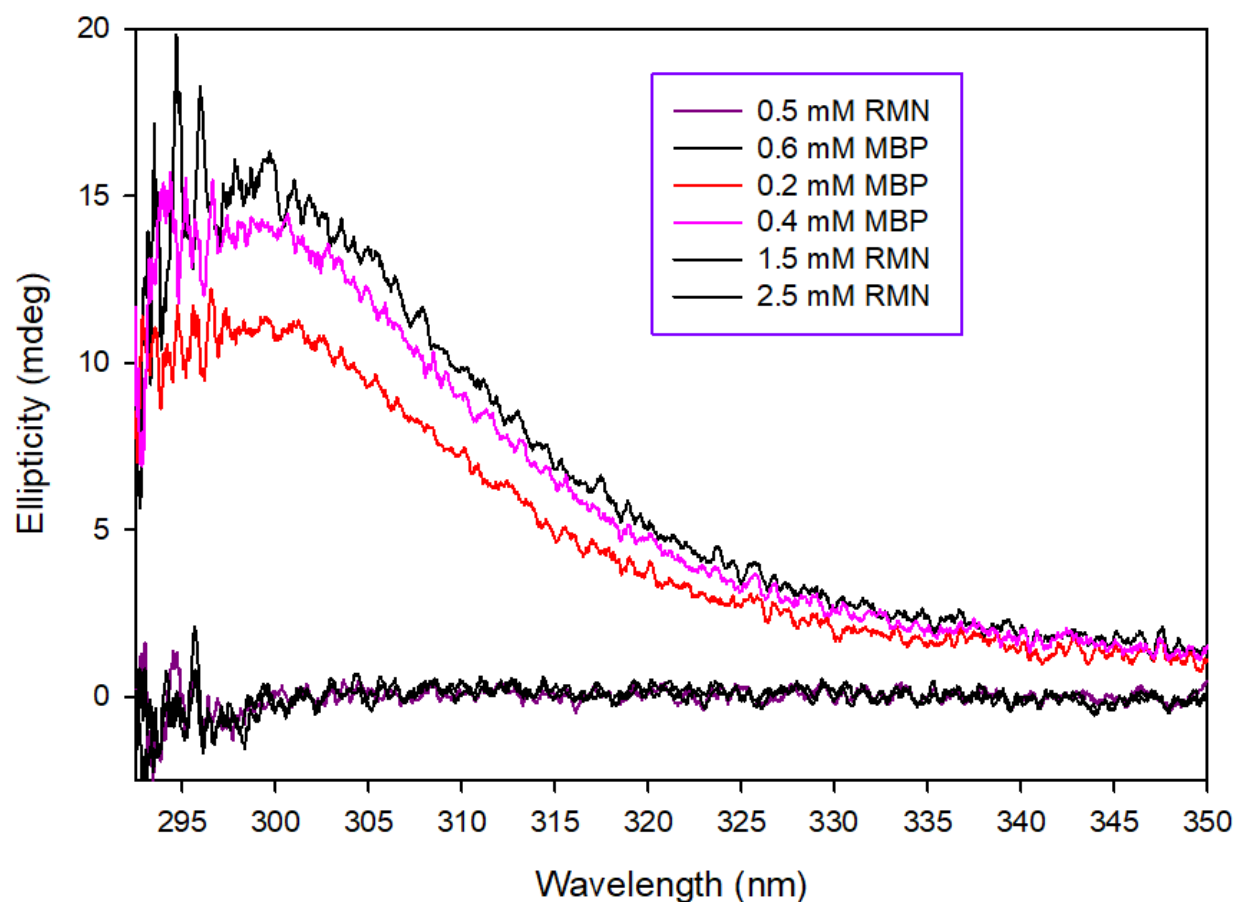

**Figure S6:** Titration of BFDC (2 mg/mL) with methyl benzoyl phosphonate and *R*-mandelate at pH 6.5. Difference spectra were obtained by subtracting the spectra of BFDC in the absence of ligand.



## 7. Energy decomposition of the calculated stationary points

|                                                 | State              | $E_{el}$ (a.u.) | $E_{bb}$ (a.u.) | $E_{solv}$ (a.u.) | ZPE (a.u.) | $E_{tot}$ (a.u.) | $E_{rel}$ (kcal/mol) |
|-------------------------------------------------|--------------------|-----------------|-----------------|-------------------|------------|------------------|----------------------|
| <b>Cofactor alone<br/>(Model A)</b>             | AP                 | -1045.28221     | -1045.47855     | -1045.35311       | 0.20993    | -1045.33951      | 0.0                  |
|                                                 | IP                 | -1045.27665     | -1045.47334     | -1045.34318       | 0.21059    | -1045.32928      | 7.4                  |
|                                                 | YIH <sup>+</sup>   | -1045.26352     | -1045.45822     | -1045.33111       | 0.21056    | -1045.31526      | 15.6                 |
|                                                 | TCH <sup>+</sup>   | -1045.28181     | -1045.47440     | -1045.35747       | 0.21505    | -1045.33502      | 2.9                  |
| <b>Empty Cavity<br/>(Model B)</b>               | AP                 | -6380.26084     | -6381.95241     | -6380.34894       | 2.51861    | -6379.54903      | 0.0                  |
|                                                 | APH <sup>+</sup> a | -6380.25933     | -6381.95903     | -6380.37001       | 2.52255    | -6379.54715      | 1.2                  |
|                                                 | IP                 | -6380.23940     | -6381.94395     | -6380.34264       | 2.51862    | -6379.52857      | 12.8                 |
|                                                 | YI                 | -6380.25425     | -6381.95597     | -6380.34900       | 2.52024    | -6379.53048      | 11.6                 |
|                                                 | YIH <sup>+</sup> a | -6380.25170     | -6381.95242     | -6380.34895       | 2.51861    | -6379.53105      | 11.3                 |
|                                                 | TC                 | -6380.27087     | -6381.97007     | -6380.36693       | 2.52131    | -6379.54483      | 2.6                  |
|                                                 | TCH <sup>+</sup> a | -6380.26542     | -6381.96515     | -6380.36540       | 2.51928    | -6379.54585      | 2.0                  |
| <b>Crystallographic<br/>water<br/>(Model C)</b> | AP                 | -6456.72502     | -6458.45660     | -6456.82834       | 2.54663    | -6456.01329      | 0.0                  |
|                                                 | APH <sup>+</sup> a | -6456.71750     | -6458.44888     | -6456.82408       | 2.54513    | -6456.01032      | 1.9                  |
|                                                 | IP                 | -6456.69510     | -6458.42979     | -6456.79865       | 2.54562    | -6455.98772      | 16.0                 |
|                                                 | YI                 | -6456.72457     | -6458.45349     | -6456.81461       | 2.54778    | -6455.99576      | 11.0                 |
|                                                 | YIH <sup>+</sup> a | -6456.71868     | -6458.44791     | -6456.81255       | 2.54625    | -6455.99553      | 11.1                 |
|                                                 | TC                 | -6456.72875     | -6458.45789     | -6456.81906       | 2.54904    | -6455.99916      | 8.9                  |
|                                                 | TCH <sup>+</sup> a | -6913.97667     | -6915.84279     | -6914.10174       | 2.61823    | -6913.33804      | 8.5                  |
| <b>Benzoylformate<br/>(Model D)</b>             | AP                 | -6913.99977     | -6915.86226     | -6914.13179       | 2.63767    | -6913.35662      | 0.0                  |
|                                                 | APH <sup>+</sup>   | -6913.98709     | -6915.85037     | -6914.12303       | 2.63451    | -6913.35180      | 3.0                  |
|                                                 | IP                 | -6914.00520     | -6915.86876     | -6914.13032       | 2.63584    | -6913.35804      | -0.9                 |
|                                                 | YI                 | -6914.00338     | -6915.86418     | -6914.12611       | 2.63507    | -6913.35183      | 3.0                  |
|                                                 | YIH <sup>+</sup>   | -6914.00856     | -6915.86697     | -6914.12503       | 2.63632    | -6913.34713      | 6.0                  |
|                                                 | TC                 | -6914.02630     | -6915.88361     | -6914.14442       | 2.63727    | -6913.36446      | -4.9                 |
|                                                 | TCH <sup>+</sup>   | -6914.02416     | -6915.88291     | -6914.14564       | 2.63779    | -6913.36660      | -6.3                 |
| <b>R-Mandelate<br/>(Model E)</b>                | AP                 | -6915.23515     | -6917.09728     | -6915.36515       | 2.66107    | -6914.56621      | 0.0                  |
|                                                 | APH <sup>+</sup>   | -6915.23045     | -6917.09363     | -6915.36243       | 2.65900    | -6914.56661      | -0.3                 |
|                                                 | IP                 | -6915.22148     | -6917.08475     | -6915.34650       | 2.65985    | -6914.54993      | 10.2                 |

|  |                        |             |             |             |         |             |      |
|--|------------------------|-------------|-------------|-------------|---------|-------------|------|
|  | <b>YI</b>              | -6915.21059 | -6917.07054 | -6915.32913 | 2.65988 | -6914.52920 | 23.2 |
|  | <b>YIH<sup>+</sup></b> | -6915.20512 | -6917.06794 | -6915.33055 | 2.65936 | -6914.53401 | 20.2 |
|  | <b>TC</b>              | -6915.23856 | -6917.09747 | -6915.35729 | 2.66259 | -6914.55361 | 7.9  |
|  | <b>TCH<sup>+</sup></b> | -6915.22551 | -6917.08637 | -6915.34831 | 2.66092 | -6914.54825 | 11.3 |

<sup>a</sup>These states have the N1'-H bond restrained to 1.15 Å in the geometry optimization.

$E_{\text{el}}$  = Energy of the optimized geometry at B3LYP/6-31G(d,p) level.

$E_{\text{bb}}$  = Single-point energy of the optimized geometry at B3LYP/6-311+G(2d,2p) level.

$E_{\text{solv}}$  = Single-point energy of the optimized geometry at B3LYP/6-31G(d,p) and SMD solvation method with  $\epsilon = 4$

$E_{\text{tot}} = E_{\text{bb}} + (E_{\text{solv}} - E_{\text{el}}) + \text{ZPE}$

$E_{\text{rel}}$  = Energy relative to **AP** in each respective model

All calculations include empirical dispersion according to Grimme's D3(BJ) method.

## 8. Cartesian coordinates of optimized structures

### Cofactor alone Model A

#### AP

|   |         |         |         |
|---|---------|---------|---------|
| C | 1.7589  | 1.5106  | 0.0781  |
| C | 1.2530  | 0.4114  | 0.7730  |
| C | 2.0354  | -0.7595 | 0.6971  |
| N | 1.6526  | -1.9482 | 1.3110  |
| N | 3.1485  | -0.8083 | -0.0387 |
| C | 3.5212  | 0.3019  | -0.6920 |
| N | 2.8721  | 1.4817  | -0.6467 |
| S | -2.5493 | -1.5611 | -0.7980 |
| C | -1.1872 | -1.2410 | 0.1524  |
| C | 4.7656  | 0.2389  | -1.5215 |
| N | -1.1972 | -0.0079 | 0.6446  |
| C | -2.3125 | 0.7586  | 0.2802  |
| C | -2.4646 | 2.1683  | 0.7549  |
| C | -0.0608 | 0.4934  | 1.4908  |
| H | -0.3720 | -1.9328 | 0.3478  |
| H | 2.3827  | -2.6495 | 1.2333  |
| H | -0.2920 | 1.5259  | 1.7431  |
| H | -0.0892 | -0.0804 | 2.4203  |
| H | 4.5587  | 0.6002  | -2.5327 |
| H | 5.5242  | 0.9047  | -1.0971 |
| H | 5.1551  | -0.7777 | -1.5575 |
| H | 1.2286  | 2.4633  | 0.1129  |
| H | -2.4876 | 2.2254  | 1.8476  |
| H | -1.6532 | 2.8060  | 0.3903  |
| H | -3.4009 | 2.5857  | 0.3870  |
| C | -3.1677 | 0.0513  | -0.5219 |
| C | -4.4706 | 0.4687  | -1.1282 |
| H | -5.3073 | -0.0652 | -0.6670 |
| H | -4.6356 | 1.5378  | -0.9904 |
| H | -4.4896 | 0.2640  | -2.2021 |
| H | 1.3121  | -1.8670 | 2.2624  |

#### IP

|   |         |         |         |
|---|---------|---------|---------|
| C | -1.9121 | 1.3430  | -0.5982 |
| C | -1.2056 | 0.2075  | -0.8043 |
| C | -1.7469 | -1.0614 | -0.2980 |
| N | -1.1146 | -2.1624 | -0.5238 |
| N | -2.9562 | -1.0228 | 0.4085  |
| C | -3.5775 | 0.0960  | 0.5813  |
| N | -3.0934 | 1.3000  | 0.0971  |
| S | 2.9870  | -1.4196 | 0.4860  |
| C | 1.6249  | -1.3539 | -0.5190 |
| C | -4.8777 | 0.1560  | 1.3234  |
| N | 1.2610  | -0.1066 | -0.7841 |
| C | 2.0593  | 0.8793  | -0.1853 |
| C | 1.7604  | 2.3278  | -0.3965 |
| C | 0.0525  | 0.1812  | -1.6150 |
| H | 1.0061  | -2.1878 | -0.8367 |
| H | -1.6425 | -2.9406 | -0.1238 |
| H | 0.2320  | 1.1249  | -2.1286 |
| H | -0.0006 | -0.6173 | -2.3569 |
| H | -4.8015 | 0.8194  | 2.1916  |
| H | -5.6761 | 0.5366  | 0.6771  |
| H | -5.1396 | -0.8455 | 1.6596  |
| H | -1.6100 | 2.3146  | -0.9729 |
| H | 1.8453  | 2.6086  | -1.4513 |
| H | 0.7523  | 2.5760  | -0.0520 |
| H | -3.6328 | 2.1433  | 0.2309  |
| H | 2.4646  | 2.9421  | 0.1630  |

|   |        |        |        |
|---|--------|--------|--------|
| C | 3.0689 | 0.3300 | 0.5532 |
| C | 4.1559 | 1.0021 | 1.3311 |
| H | 5.1337 | 0.8304 | 0.8705 |
| H | 3.9901 | 2.0793 | 1.3752 |
| H | 4.1965 | 0.6273 | 2.3577 |

#### YIH<sup>+</sup>

|   |         |         |         |
|---|---------|---------|---------|
| C | 1.9316  | 1.4317  | 0.3610  |
| C | 1.2029  | 0.3262  | 0.6698  |
| C | 1.7944  | -0.9508 | 0.3130  |
| N | 1.1596  | -2.0844 | 0.5186  |
| N | 3.0483  | -1.0121 | -0.2340 |
| C | 3.6968  | 0.0864  | -0.5007 |
| N | 3.1551  | 1.3168  | -0.2399 |
| S | -2.9106 | -1.5272 | -0.3590 |
| C | -1.4712 | -1.3379 | 0.5430  |
| C | 5.0638  | 0.0461  | -1.1054 |
| N | -1.2784 | -0.0135 | 0.6934  |
| C | -2.2176 | 0.8802  | 0.1275  |
| C | -2.0562 | 2.3604  | 0.2686  |
| C | -0.0901 | 0.4311  | 1.4446  |
| H | 1.6400  | -2.9295 | 0.2308  |
| H | -0.2397 | 1.4587  | 1.7742  |
| H | -0.0252 | -0.1957 | 2.3374  |
| H | 5.0790  | 0.5730  | -2.0653 |
| H | 5.7939  | 0.5248  | -0.4442 |
| H | 5.3518  | -0.9916 | -1.2634 |
| H | 1.6005  | 2.4385  | 0.5866  |
| H | -2.1107 | 2.6820  | 1.3147  |
| H | -1.1032 | 2.7075  | -0.1468 |
| H | -2.8508 | 2.8770  | -0.2697 |
| C | -3.2133 | 0.2010  | -0.5014 |
| C | -4.4244 | 0.7234  | -1.2068 |
| H | -5.3400 | 0.4392  | -0.6784 |
| H | -4.4028 | 1.8129  | -1.2753 |
| H | -4.4916 | 0.3249  | -2.2235 |
| H | 0.0907  | -2.0697 | 0.6822  |
| H | 3.6857  | 2.1500  | -0.4612 |

#### TCH<sup>+</sup>

|   |         |         |         |
|---|---------|---------|---------|
| C | -2.2195 | 1.5196  | -0.3289 |
| C | -1.1279 | 0.8355  | -0.7562 |
| C | -1.1128 | -0.5766 | -0.4859 |
| N | -0.0730 | -1.3061 | -0.8683 |
| N | -2.1413 | -1.2057 | 0.1431  |
| C | -3.1803 | -0.4999 | 0.5111  |
| N | -3.2402 | 0.8486  | 0.2950  |
| S | 2.5939  | -1.4650 | -0.3676 |
| C | 1.2384  | -0.7096 | -1.3185 |
| C | -4.3483 | -1.1496 | 1.1806  |
| N | 1.2830  | 0.6978  | -1.0241 |
| C | 1.8008  | 0.9279  | 0.2945  |
| C | 1.5973  | 2.2748  | 0.9090  |
| C | 2.5243  | -0.0916 | 0.7867  |
| C | 3.3107  | -0.1981 | 2.0518  |
| C | 0.0819  | 1.4065  | -1.4568 |
| H | 1.3511  | -0.9141 | -2.3846 |
| H | -0.0847 | -2.2903 | -0.6174 |
| H | -0.0164 | 1.2774  | -2.5409 |
| H | -4.5939 | -0.6453 | 2.1206  |
| H | -5.2310 | -1.1090 | 0.5329  |
| H | -2.3483 | 2.5878  | -0.4582 |
| H | 1.9734  | 3.0648  | 0.2488  |
| H | 2.1353  | 2.3500  | 1.8532  |
| H | 0.5402  | 2.4842  | 1.1147  |
| H | 3.2269  | 0.7140  | 2.6454  |
| H | 4.3737  | -0.3635 | 1.8432  |
| H | 2.9627  | -1.0354 | 2.6659  |
| H | 0.1886  | 2.4753  | -1.2689 |
| H | -4.1080 | -2.1918 | 1.3830  |
| H | -4.0598 | 1.3597  | 0.5997  |

#### Empty cavity

### Model B

#### AP

|   |         |         |         |
|---|---------|---------|---------|
| C | 11.5114 | 5.5184  | -1.5740 |
| C | 10.8579 | 4.1408  | -1.7482 |
| C | 10.0720 | 3.6562  | -0.5625 |
| C | 9.7913  | 4.2941  | 0.6237  |
| N | 9.5102  | 2.3878  | -0.5509 |
| C | 8.9016  | 2.2671  | 0.6154  |
| N | 9.0437  | 3.3951  | 1.3627  |
| H | 10.7588 | 6.2925  | -1.3886 |
| H | 11.6280 | 3.3935  | -1.9779 |
| H | 10.1973 | 4.1557  | -2.6254 |
| H | 10.0423 | 5.2727  | 0.9999  |
| H | 8.3502  | 1.4118  | 0.9818  |
| H | 8.6371  | 3.5461  | 2.2724  |
| C | -9.4680 | 1.9224  | -4.3238 |
| C | -8.3756 | 2.6355  | -3.5072 |
| C | -7.2895 | 1.7008  | -3.0226 |
| C | -6.2428 | 1.3057  | -3.8687 |
| C | -7.2957 | 1.4830  | -1.7227 |
| C | -5.2458 | 0.4345  | -3.4383 |
| C | -6.3038 | 0.3121  | -1.2720 |
| C | -5.2628 | -0.0687 | -2.1303 |
| O | -4.2556 | -0.9010 | -1.7670 |
| H | -9.9588 | 1.1505  | -3.7221 |
| H | -8.8348 | 3.1368  | -2.6468 |
| H | -7.9299 | 3.4253  | -4.1246 |
| H | -6.2011 | 1.6955  | -4.8830 |
| H | -8.0760 | 1.4909  | -1.0309 |
| H | -4.4350 | 0.1421  | -4.0970 |
| H | -6.3157 | -0.0306 | -0.2457 |
| H | -4.3044 | -1.1755 | -0.8170 |
| C | -0.1697 | -6.7752 | -5.1636 |
| C | -0.1913 | -6.5664 | -3.6457 |
| C | -1.4157 | -5.8771 | -3.0778 |
| C | -1.7712 | -6.1039 | -1.7421 |
| C | -2.2052 | -4.9838 | -3.8150 |
| C | -2.8640 | -5.4721 | -1.1584 |
| C | -3.3110 | -4.3483 | -3.2492 |
| C | -3.6469 | -4.5985 | -1.9174 |
| O | -4.7614 | -3.9970 | -1.4070 |
| H | -0.1524 | -5.8231 | -5.7038 |
| H | -0.0805 | -7.5371 | -3.1479 |
| H | 0.7026  | -5.9913 | -3.3637 |
| H | -1.1819 | -6.7941 | -1.1448 |
| H | -1.9654 | -4.7812 | -4.8540 |
| H | -3.1179 | -5.6659 | -0.1191 |
| H | -3.9155 | -3.6500 | -3.8170 |
| H | -4.7670 | -4.0981 | -0.4455 |
| C | 4.9875  | -4.3007 | -5.9139 |
| C | 4.5141  | -4.1976 | -4.4739 |
| O | 4.2960  | -3.1148 | -3.9253 |
| C | 4.4778  | -3.1495 | -6.7791 |
| H | 6.0851  | -4.2828 | -5.8747 |
| H | 4.7222  | -2.1949 | -6.3088 |
| H | 3.3903  | -3.1969 | -6.8942 |
| H | 4.9267  | -3.1786 | -7.7751 |
| N | 4.4213  | -5.3883 | -3.8260 |
| C | 4.5262  | -5.5148 | -2.3752 |
| C | 3.2237  | -5.5889 | -1.5809 |
| C | 2.5060  | -4.2505 | -1.3581 |
| C | 1.2739  | -4.4732 | -0.4763 |
| C | 3.4432  | -3.2114 | -0.7329 |
| H | 4.6496  | -6.2096 | -4.3658 |
| H | 5.1287  | -4.6833 | -2.0077 |
| H | 3.4752  | -6.0047 | -0.5953 |
| H | 2.5464  | -6.3087 | -2.0571 |
| H | 2.1837  | -3.8722 | -2.3345 |
| H | 1.5739  | -4.8138 | 0.5221  |
| H | 0.6930  | -3.5608 | -0.3346 |
| H | 0.6020  | -5.2219 | -0.9039 |
| H | 4.2501  | -2.9277 | -1.4088 |
| H | 3.8673  | -3.5831 | 0.2057  |
| H | 2.8959  | -2.2975 | -0.5014 |

C 9.5105 -5.2180 -1.3683  
C 8.2681 -4.4440 -0.9044  
C 8.2305 -3.0069 -1.3793  
C 7.2467 -2.5633 -2.2693  
C 9.1677 -2.0760 -0.9085  
C 7.1732 -1.2230 -2.6573  
C 9.1103 -0.7395 -1.2980  
C 8.1040 -0.3042 -2.1674  
H 10.4281 -4.7388 -1.0154  
H 8.2275 -4.4585 0.1923  
H 7.3674 -4.9634 -1.2496  
H 6.5141 -3.2606 -2.6573  
H 9.9360 -2.3979 -0.2101  
H 6.3865 -0.9146 -3.3401  
H 9.8209 -0.0102 -0.9243  
H 8.0747 0.7443 -2.4485  
C -2.5742 0.8441 0.4263  
C -1.3164 1.1261 -0.0707  
C -1.1889 2.3320 -0.8187  
N 0.0024 2.8015 -1.2504  
N -2.2938 3.0411 -1.1477  
C -3.4728 2.6646 -0.6434  
N -3.6466 1.6182 0.1808  
S 2.4318 -0.3743 -2.6324  
C 1.7921 0.2732 -1.2065  
C -4.6820 3.4627 -1.0199  
N 0.5991 -0.2318 -0.9163  
C 0.1251 -1.1822 -1.8255  
C -1.1930 -1.8467 -1.6162  
C 1.0163 -1.3758 -2.8473  
C 0.8901 -2.2641 -4.0433  
C -0.1684 0.2237 0.2728  
H 2.2882 1.0019 -0.5743  
H 0.0289 3.6924 -1.7504  
H -0.5190 -0.6702 0.7929  
H 0.5448 0.7335 0.9163  
H -5.1527 3.0155 -1.9016  
H -5.4046 3.4421 -0.2054  
H -4.4097 4.4910 -1.2599  
H -2.7485 -0.0299 1.0503  
H -1.2993 -2.1973 -0.5856  
H -1.2830 -2.7102 -2.2741  
H -2.0259 -1.1724 -1.8369  
H 0.2469 -3.1169 -3.8129  
H 1.8705 -2.6351 -4.3513  
C 2.4643 -2.4817 7.1084  
C 1.6856 -1.1650 6.9822  
C 2.3851 -0.1470 6.0707  
O 2.5390 -0.5259 4.8326  
O 2.7525 0.9427 6.5212  
C -7.9311 2.7694 4.0749  
C -7.1059 1.6026 3.5436  
C -6.3667 1.9308 2.2624  
O -6.5300 2.9754 1.6407  
O -5.5277 0.9777 1.9000  
H -8.4282 2.4921 5.0090  
H -7.2997 3.6388 4.2703  
H -7.7342 0.7247 3.3440  
H -6.3587 1.2692 4.2724  
C -0.3642 2.1749 5.1491  
C -0.2904 1.5609 3.7494  
C 0.8817 2.0086 2.9344  
C 0.9413 2.8431 1.8373  
N 2.1604 1.5098 3.0747  
C 2.9118 2.0149 2.0567  
N 2.2006 2.8209 1.2681  
H 0.5374 1.9541 5.7279  
H -0.2754 0.4682 3.8244  
H -1.1975 1.8099 3.1875  
H 0.1379 3.4315 1.4186  
H 3.9688 1.8166 1.9459  
C 5.6882 7.3426 2.1978  
C 5.3352 6.1081 3.0354  
C 6.0498 4.8114 2.6109  
C 5.8067 3.6981 3.6406  
C 5.6440 4.3511 1.2049  
H 5.3842 7.2241 1.1523

H 4.2510 5.9353 3.0009  
H 5.5771 6.3112 4.0869  
H 7.1289 5.0370 2.5949  
H 4.7373 3.4791 3.7321  
H 6.3078 2.7625 3.3642  
H 6.1634 3.9890 4.6346  
H 4.5593 4.2122 1.1393  
H 6.1229 3.3981 0.9579  
H 5.9404 5.0743 0.4388  
H 0.4415 -1.7176 -4.8804  
H -8.6944 3.0690 3.3555  
H 12.2068 5.5196 -0.7280  
H 12.0688 5.7999 -2.4712  
H -10.2319 2.6289 -4.6639  
H -9.0387 1.4331 -5.2041  
H -0.4652 3.2634 5.0893  
H -1.2295 1.7809 5.6913  
H 6.7687 7.5292 2.2074  
H 5.1922 8.2377 2.5855  
H 0.6912 -1.3684 6.5605  
H 1.5395 -0.7016 7.9611  
H 2.6566 -2.9089 6.1195  
H 1.9151 -3.2153 7.7077  
H 3.4333 -2.3127 7.5893  
H 9.4987 -6.2445 -0.9886  
H -4.5589 -5.2566 -2.4616  
H 5.1028 -6.4277 -2.1922  
H 0.7239 -7.3331 -5.4584  
H -1.0481 -7.3339 -5.5015  
H 4.7078 -5.2707 -6.3415  
H -4.9073 1.2800 1.1350  
C 2.1251 6.9081 -3.4514  
C 0.9034 6.2656 -2.8388  
O 0.8044 5.0407 -2.7358  
N -0.0750 7.1139 -2.4194  
C -1.4056 6.5818 -2.1869  
C -2.0281 6.1347 -3.5202  
O -1.8200 6.7776 -4.5466  
N -2.8031 5.0305 -3.4305  
C -3.3486 4.3817 -4.6167  
C -2.8614 2.9290 -4.7163  
C -1.3356 2.7511 -4.6599  
C -0.9795 1.2629 -4.5647  
C -0.6195 3.4328 -5.8300  
H 3.0091 6.3349 -3.1688  
H 2.0258 6.8668 -4.5411  
H -1.3522 5.7606 -1.4701  
H -2.0244 7.3714 -1.7521  
H -3.3127 2.3555 -3.8986  
H -3.2536 2.4957 -5.6471  
H -0.9777 3.2288 -3.7439  
H 0.4631 3.2870 -5.7554  
H -0.9511 3.0204 -6.7915  
H -0.8051 4.5103 -5.8373  
H -1.3079 0.7185 -5.4594  
H -1.4582 0.7971 -3.6959  
H 0.1028 1.1264 -4.4668  
H -3.0409 4.9800 -5.4759  
C -4.5521 -3.1288 3.5644  
C -3.1504 -2.5345 3.7245  
O -2.9641 -1.3208 3.7944  
C -5.5095 -2.1809 2.8265  
C -5.2891 -2.1346 1.3263  
N -6.3160 -2.5482 0.5559  
O -4.2277 -1.7238 0.8238  
N -2.1368 -3.4263 3.8870  
C -0.7825 -2.9505 4.1212  
C -0.1381 -2.4459 2.8265  
O -0.6089 -2.7123 1.7124  
C -0.0463 -4.2200 4.5946  
C -0.7123 -5.3147 3.7473  
C -2.1858 -4.8779 3.6643  
N 1.0159 -1.7864 3.0197  
C 1.9500 -1.5846 1.9455  
C 3.3526 -2.0202 2.3602  
O 3.5816 -3.1068 2.8808  
N 4.2944 -1.0903 2.0661

C 5.7196 -1.2655 2.2414  
C 6.3064 -0.4029 3.3845  
O 7.4675 0.0097 3.3129  
C 6.4347 -1.0014 0.9284  
O 6.0065 0.2767 0.4449  
N 5.5000 -0.2224 4.4482  
C 5.9914 0.3647 5.6871  
H -6.5439 -2.4670 3.0340  
H -5.3367 -1.1625 3.1842  
H -4.5243 -4.1072 3.0776  
H -0.2362 -4.3751 5.6613  
H 1.0320 -4.1515 4.4381  
H -0.6013 -6.3159 4.1700  
H -0.2766 -5.3148 2.7445  
H -2.7964 -5.3666 4.4341  
H -2.6162 -5.1122 2.6853  
H -0.7846 -2.1515 4.8663  
H 1.9705 -0.5410 1.6274  
H 1.6286 -2.1980 1.1050  
H 7.5110 -1.0145 1.1094  
H 6.1792 -1.7866 0.2090  
H 6.4784 0.4280 -0.3863  
H 5.8717 -2.3116 2.5298  
H 6.7543 1.1084 5.4536  
H 2.2508 7.9513 -3.1516  
H -4.4451 4.3945 -4.5767  
H -2.6727 4.4450 -2.6049  
H -0.0406 8.0516 -2.7935  
H 6.4430 -0.3986 6.3341  
H 5.1510 0.8305 6.2039  
H 4.5282 -0.5305 4.4315  
H 1.3836 -1.5158 3.9483  
H -7.1386 -3.0278 0.9260  
H -6.1953 -2.5095 -0.4476  
H 4.0185 -0.2501 1.5808  
H -4.9373 -3.3008 4.5768  
C -10.4257 -5.2186 2.1683  
C -9.5409 -4.5138 1.1657  
O -8.3939 -4.1688 1.4721  
C -10.7220 -4.2360 3.3053  
N -10.0935 -4.2175 -0.0296  
C -9.3902 -3.4241 -1.0201  
C -8.6256 6.9745 3.1146  
C -8.5156 5.7269 2.2447  
C -8.4444 6.0244 0.7485  
N -8.0355 4.9573 -0.0056  
O -8.7723 7.0984 0.2604  
H -9.7865 -3.8847 3.7458  
H -11.3203 -4.7091 4.0886  
H -11.2741 -3.3657 2.9369  
H -11.3515 -5.5812 1.7086  
H -8.4493 -3.9058 -1.3035  
H -7.6472 5.1225 2.5191  
H -9.3898 5.0805 2.4000  
H -7.5718 4.1714 0.4341  
H -7.8730 5.1279 -0.9866  
H -9.4766 7.5857 2.8056  
H -8.7483 6.7018 4.1671  
H -7.7299 7.5959 3.0238  
H -9.8787 -6.0857 2.5499  
H -9.1615 -2.4238 -0.6382  
H -10.0145 -3.3268 -1.9086  
H -11.0405 -4.5084 -0.2135  
H 0.8274 2.6289 -0.6892  
H 2.4528 0.8138 3.8084

### APH<sup>+</sup>

C 11.4278 5.5960 -1.3822  
C 10.6047 4.3247 -1.6319  
C 9.9456 3.7431 -0.4128  
C 9.9213 4.2140 0.8796  
N 9.2286 2.5570 -0.4875  
C 8.7837 2.3193 0.7336  
N 9.1833 3.2909 1.5990  
H 10.8023 6.3980 -0.9758  
H 11.2436 3.5528 -2.0796

|   |         |         |         |   |          |         |         |   |         |         |         |
|---|---------|---------|---------|---|----------|---------|---------|---|---------|---------|---------|
| H | 9.8298  | 4.5313  | -2.3821 | H | 9.7869   | 0.0878  | -0.8147 | H | -8.9747 | 1.5311  | -5.1699 |
| H | 10.3501 | 5.0880  | 1.3425  | H | 8.0698   | 0.8409  | -2.3662 | H | -0.5145 | 3.0124  | 5.2461  |
| H | 8.1752  | 1.4845  | 1.0540  | C | -2.6723  | 0.8651  | 0.5839  | H | -1.3129 | 1.4886  | 5.6772  |
| H | 8.9349  | 3.3417  | 2.5749  | C | -1.4437  | 1.1604  | 0.0469  | H | 6.6388  | 7.5128  | 2.3338  |
| C | -9.5124 | 1.8968  | -4.2891 | C | -1.3491  | 2.3976  | -0.6680 | H | 5.0722  | 8.0681  | 2.9404  |
| C | -8.5698 | 2.6845  | -3.3637 | N | -0.1906  | 2.8938  | -1.1187 | H | 0.6452  | -1.6757 | 6.5059  |
| C | -7.4066 | 1.8479  | -2.8824 | N | -2.4642  | 3.1211  | -0.9421 | H | 1.4835  | -1.0380 | 7.9272  |
| C | -6.2973 | 1.6161  | -3.7097 | C | -3.6232  | 2.7586  | -0.4112 | H | 2.6242  | -3.1690 | 6.0122  |
| C | -7.4152 | 1.2409  | -1.6321 | N | -3.7324  | 1.6806  | 0.3948  | H | 1.9179  | -3.5286 | 7.6047  |
| C | -5.2350 | 0.8191  | -3.2924 | S | 2.5589   | -0.0730 | -2.3648 | H | 3.4159  | -2.5933 | 7.4835  |
| C | -6.3584 | 0.4424  | -1.1834 | C | 1.7907   | 0.4688  | -0.9596 | H | 9.5347  | -6.1940 | -1.1760 |
| C | -5.2536 | 0.2423  | -2.0174 | C | -4.8452  | 3.5571  | -0.7073 | H | 9.4806  | -5.1745 | -2.6277 |
| O | -4.1524 | -0.4597 | -1.6332 | N | 0.5768   | -0.0577 | -0.8206 | H | 5.0688  | -6.4266 | -2.4484 |
| H | -9.9251 | 1.0266  | -3.7687 | C | 0.1963   | -0.9391 | -1.8362 | H | 0.7070  | -7.3149 | -5.6999 |
| H | -9.1326 | 3.0606  | -2.5016 | C | -1.1235  | -1.6285 | -1.7830 | H | -1.0529 | -7.1407 | -5.7691 |
| H | -8.1953 | 3.5649  | -3.9004 | C | 1.1792   | -1.0585 | -2.7834 | H | 4.6095  | -5.0457 | -6.5231 |
| H | -6.2647 | 2.0681  | -4.6981 | C | 1.1737   | -1.8645 | -4.0431 | H | -4.6369 | 1.3971  | 0.9319  |
| H | -8.2495 | 1.4212  | -0.9489 | C | -0.2788  | 0.2598  | 0.3497  | C | 2.0319  | 6.9590  | -3.2309 |
| H | -4.3805 | 0.6381  | -3.9340 | H | 2.2239   | 1.1635  | -0.2421 | C | 0.7892  | 6.3512  | -2.6253 |
| H | -6.3623 | 0.0407  | -0.1765 | H | -0.1578  | 3.8022  | -1.5910 | O | 0.6855  | 5.1317  | -2.4626 |
| H | -4.3027 | -0.9377 | -0.7922 | H | -0.6194  | -0.6922 | 0.7656  | N | -0.2036 | 7.2160  | -2.2847 |
| C | -0.1315 | -6.6812 | -5.3970 | H | 0.3751   | 0.7392  | 1.0768  | C | -1.5440 | 6.6996  | -2.0697 |
| C | -0.1575 | -6.5228 | -3.8730 | H | -5.3389  | 3.1391  | -1.5912 | C | -2.1304 | 6.2068  | -3.4037 |
| C | -1.2969 | -5.7046 | -3.3037 | H | -5.5434  | 3.4941  | 0.1307  | O | -1.8784 | 6.8087  | -4.4447 |
| C | -1.4930 | -5.6835 | -1.9161 | H | -4.5714  | 4.5909  | -0.9201 | N | -2.9242 | 5.1158  | -3.3039 |
| C | -2.1578 | -4.9351 | -4.0943 | H | -2.8582  | -0.0206 | 1.1879  | C | -3.4160 | 4.4215  | -4.4891 |
| C | -2.4773 | -4.9008 | -1.3268 | H | -1.2510  | -2.1376 | -0.8229 | C | -2.7506 | 3.0446  | -4.6263 |
| C | -3.1690 | -4.1628 | -3.5222 | H | -1.1854  | -2.3794 | -2.5692 | C | -1.2147 | 3.0583  | -4.6824 |
| C | -3.3248 | -4.1332 | -2.1352 | H | -1.9579  | -0.9336 | -1.9165 | C | -0.6719 | 1.6271  | -4.5812 |
| O | -4.2995 | -3.3476 | -1.6059 | H | 0.5129   | -2.7277 | -3.9335 | C | -0.6785 | 3.7792  | -5.9239 |
| H | -0.0141 | -5.7155 | -5.8992 | H | 2.1794   | -2.2226 | -4.2770 | H | 2.9024  | 6.3845  | -2.9124 |
| H | -0.1691 | -7.5163 | -3.4076 | C | 2.4423   | -2.7698 | 7.0147  | H | 1.9527  | 6.8866  | -4.3207 |
| H | 0.7920  | -6.0646 | -3.5610 | C | 1.6358   | -1.4668 | 6.9337  | H | -1.5140 | 5.9069  | -1.3198 |
| H | -0.8573 | -6.2956 | -1.2829 | C | 2.3190   | -6.4117 | 6.0557  | H | -2.1704 | 7.5074  | -1.6819 |
| H | -2.0465 | -4.9326 | -5.1735 | O | 2.4747   | -0.7442 | 4.8045  | H | -3.0648 | 2.4330  | -3.7729 |
| H | -2.5826 | -4.8614 | -0.2463 | O | 2.6800   | 0.6658  | 6.5409  | H | -3.1512 | 2.5513  | -5.5232 |
| H | -3.8301 | -3.5561 | -4.1319 | C | -7.9971  | 2.4810  | 4.1358  | H | -0.8503 | 3.6061  | -3.8075 |
| H | -4.0279 | -3.0052 | -0.7212 | C | -7.1858  | 1.3252  | 3.5570  | H | 0.4163  | 3.7527  | -5.9411 |
| C | 5.0035  | -4.1353 | -6.0555 | C | -6.4206  | 1.6881  | 2.2855  | H | -1.0392 | 3.3013  | -6.8436 |
| C | 4.5772  | -4.0594 | -4.5982 | O | -6.6182  | 2.7992  | 1.7442  | H | -0.9838 | 4.8288  | -5.9368 |
| O | 4.4793  | -2.9873 | -3.9970 | O | -5.5932  | 0.8063  | 1.8589  | H | -0.9940 | 1.0190  | -5.4360 |
| C | 4.6031  | -2.8921 | -6.8472 | H | -8.4935  | 2.1807  | 5.0649  | H | -1.0252 | 1.1337  | -3.6691 |
| H | 6.0968  | -4.2398 | -6.0467 | H | -7.3564  | 3.3380  | 4.3538  | H | 0.4236  | 1.6245  | -4.5616 |
| H | 4.9647  | -1.9954 | -6.3401 | H | -7.8311  | 0.4685  | 3.3207  | H | -3.2093 | 5.0667  | -5.3436 |
| H | 3.5145  | -2.8138 | -6.9302 | H | -6.4523  | 0.9486  | 4.2792  | C | -4.5620 | -3.3654 | 3.4378  |
| H | 5.0201  | -2.9200 | -7.8570 | C | -0.4266  | 1.9222  | 5.2044  | C | -3.1379 | -2.8178 | 3.5633  |
| N | 4.3849  | -5.2643 | -3.9982 | C | -0.3142  | 1.4442  | 3.7550  | O | -2.9165 | -1.6157 | 3.7082  |
| C | 4.5478  | -5.4696 | -2.5597 | C | 0.8993   | 1.9312  | 3.0262  | C | -5.4916 | -2.3807 | 2.7031  |
| C | 3.2873  | -5.4973 | -1.7003 | C | 1.0209   | 2.8013  | 1.9597  | C | -5.2706 | -2.3758 | 1.2085  |
| C | 2.6343  | -4.1364 | -1.4224 | N | 2.1708   | 1.4372  | 3.2296  | N | -6.2928 | -2.7472 | 0.4319  |
| C | 1.4612  | -4.3284 | -0.4575 | C | 2.9804   | 1.9838  | 2.2814  | O | -4.1633 | -2.0398 | 0.7098  |
| C | 3.6439  | -3.1358 | -0.8486 | N | 2.3152   | 2.8120  | 1.4766  | N | -2.1332 | -3.7330 | 3.6154  |
| H | 4.5193  | -6.0769 | -4.5814 | H | 0.4541   | 1.6369  | 5.7866  | C | -0.7712 | -3.2835 | 3.8589  |
| H | 5.2235  | -4.6989 | -2.1846 | H | -0.3318  | 0.3484  | 3.7280  | C | -0.1747 | -2.5876 | 2.6347  |
| H | 3.5758  | -5.9364 | -0.7350 | H | -1.1935  | 1.7748  | 3.1903  | O | -0.6391 | -2.7407 | 1.4965  |
| H | 2.5543  | -6.1833 | -2.1436 | H | 0.2446   | 3.4101  | 5.1186  | C | -0.0045 | -4.5981 | 4.1140  |
| H | 2.2551  | -3.7437 | -2.3736 | H | 4.0421   | 1.7888  | 2.2271  | C | -0.7255 | -5.5822 | 3.1812  |
| H | 1.8276  | -4.5343 | 0.5549  | C | 5.5816   | 7.2405  | 2.4364  | C | -2.2013 | -5.1619 | 3.2775  |
| H | 0.8212  | -3.4469 | -0.3972 | C | 5.4234   | 5.9348  | 3.2231  | N | 0.9453  | -1.8934 | 2.9054  |
| H | 0.8227  | -5.1579 | -0.7660 | C | 6.1783   | 4.7271  | 2.6368  | C | 1.8901  | -1.5492 | 1.8782  |
| H | 4.3976  | -2.8480 | -1.5813 | C | 6.1008   | 3.5335  | 3.6007  | C | 3.2848  | -2.0592 | 2.2343  |
| H | 4.1334  | -3.5518 | 0.0377  | C | 5.6690   | 4.3411  | 1.2410  | O | 3.4887  | -3.2004 | 2.6361  |
| H | 3.1433  | -2.2195 | -0.5315 | H | 5.1624   | 7.1594  | 1.4287  | N | 4.2459  | -1.1272 | 2.0271  |
| C | 9.5275  | -5.1595 | -1.5339 | H | 4.3584   | 5.6761  | 3.2981  | C | 5.6681  | -1.3393 | 2.1861  |
| C | 8.3421  | -4.3794 | -0.9468 | H | 5.7700   | 6.0962  | 4.2526  | C | 6.2661  | -0.5456 | 3.3735  |
| C | 8.2858  | -2.9323 | -1.3871 | H | 7.2352   | 5.0193  | 2.5370  | O | 7.4386  | -0.1622 | 3.3363  |
| C | 7.3194  | -2.4908 | -2.2971 | H | 5.0590   | 3.2601  | 3.8005  | C | 6.3897  | -1.0193 | 0.8880  |
| C | 9.1886  | -1.9926 | -0.8696 | H | 6.5998   | 2.6437  | 3.1997  | O | 5.9626  | 0.2786  | 0.4556  |
| C | 7.2252  | -1.1440 | -2.6561 | H | 6.5581   | 3.7715  | 4.5682  | N | 5.4503  | -0.3810 | 4.4331  |
| C | 9.1086  | -0.6487 | -1.2299 | H | 4.5895   | 4.1544  | 1.2535  | C | 5.9448  | 0.1546  | 5.6947  |
| C | 8.1174  | -0.2148 | -2.1167 | H | 6.1642   | 3.4316  | 0.8852  | H | -6.5351 | -2.6249 | 2.9164  |
| H | 10.4785 | -4.6972 | -1.2519 | H | 5.8667   | 5.1293  | 0.5081  | H | -5.2875 | -1.3606 | 3.0426  |
| H | 8.3961  | -4.4178 | 0.1483  | H | 0.8090   | -1.2606 | -4.8812 | H | -4.5857 | -4.3500 | 2.9651  |
| H | 7.4066  | -4.8781 | -1.2246 | H | -8.7610  | 2.8100  | 3.4311  | H | -0.1233 | -4.8913 | 5.1620  |
| H | 6.6136  | -3.1941 | -2.7230 | H | 12.2369  | 5.4086  | -0.6686 | H | 1.0616  | -4.4957 | 3.9001  |
| H | 9.9441  | -2.3146 | -0.1571 | H | 11.8746  | 5.9572  | -2.3125 | H | -0.5749 | -6.6287 | 3.4559  |
| H | 6.4505  | -0.8396 | -3.3540 | H | -10.3457 | 2.5188  | -4.6312 | H | -0.3722 | -5.4388 | 2.1565  |

H -2.7279 -5.7220 4.0612  
H -2.7296 -5.3195 2.3325  
H -0.7433 -2.6004 4.7118  
H 1.9247 -0.4712 1.7195  
H 1.5717 -2.0306 0.9549  
H 7.4646 -1.0391 1.0749  
H 6.1391 -1.7727 0.1345  
H 6.4430 0.4680 -0.3630  
H 5.8012 -2.4019 2.4170  
H 6.6907 0.9246 5.4902  
H 2.1631 8.0093 -2.9599  
H -4.5021 4.2944 -4.4121  
H -2.8437 4.5623 -2.4530  
H -0.1528 8.1381 -2.6940  
H 6.4180 -0.6288 6.2994  
H 5.1006 0.5796 6.2394  
H 4.4767 -0.6833 4.4020  
H 1.2983 -1.7127 3.8584  
H -7.1207 -3.2167 0.8028  
H -6.1133 -2.8361 -0.5609  
H 3.9823 -0.2321 1.6438  
H -4.9342 -3.4981 4.4604  
C -10.4060 -5.4629 1.9650  
C -9.5291 -4.7131 0.9884  
O -8.3906 -4.3583 1.3110  
C -10.7207 -4.5210 3.1307  
N -10.0819 -4.3907 -0.2006  
C -9.3897 -3.5547 -1.1631  
C -8.7295 6.7088 3.3131  
C -8.6454 5.4496 2.4591  
C -8.6389 5.7110 0.9554  
N -8.2750 4.6178 0.2157  
O -8.9684 6.7797 0.4532  
H -9.7924 -4.1688 3.5848  
H -11.3137 -5.0275 3.8972  
H -11.2851 -3.6481 2.7882  
H -11.3244 -5.8256 1.4906  
H -8.4697 -4.0374 -1.5082  
H -7.7617 4.8548 2.7034  
H -9.5050 4.7985 2.6648  
H -7.7819 3.8469 0.6621  
H -8.1502 4.7665 -0.7747  
H -9.6005 7.3079 3.0363  
H -8.8005 6.4503 4.3739  
H -7.8460 7.3388 3.1729  
H -9.8462 -6.3328 2.3209  
H -9.1259 -2.5868 -0.7260  
H -10.0395 -3.3870 -2.0222  
H -11.0216 -4.6954 -0.3984  
H 0.6813 2.6066 -0.7037  
H 2.4206 0.6881 3.9281

## IP

C 11.6909 5.0205 -2.3691  
C 11.7871 3.6380 -1.7048  
C 10.5584 3.1879 -0.9609  
C 9.2521 3.6107 -1.0724  
N 10.6447 2.1988 0.0098  
C 9.4222 2.0361 0.4789  
N 8.5390 2.8623 -0.1501  
H 10.8989 5.0460 -3.1257  
H 12.6201 3.6254 -0.9932  
H 12.0425 2.8879 -2.4662  
H 8.7789 4.3571 -1.6903  
H 9.1043 1.3623 1.2630  
H 7.5541 2.9240 0.0552  
C -9.4488 1.8702 -4.3227  
C -8.1587 2.4309 -3.6982  
C -7.2520 1.3562 -3.1370  
C -6.6144 0.4413 -3.9886  
C -7.0332 1.2237 -1.7609  
C -5.7930 -0.5650 -3.4902  
C -6.2126 0.2191 -1.2433  
C -5.5812 -0.6755 -2.1109  
O -4.7604 -1.6799 -1.6743  
H -10.0318 1.3223 -3.5756

H -8.4189 3.1362 -2.9005  
H -7.6188 3.0095 -4.4597  
H -6.7571 0.5226 -5.0636  
H -7.4846 1.9220 -1.0611  
H -5.2933 -1.2637 -4.1531  
H -6.0547 0.1711 -0.1718  
H -4.5202 -1.5703 -0.7191  
C -0.4487 -7.1736 -4.4667  
C -0.4285 -6.8132 -2.9774  
C -1.7302 -6.2723 -2.4113  
C -1.9626 -6.3225 -1.0300  
C -2.7281 -5.6973 -3.2113  
C -3.1388 -5.8336 -0.4662  
C -3.9105 -5.2026 -2.6648  
C -4.1272 -5.2813 -1.2877  
O -5.3282 -4.8461 -0.8091  
H -0.6016 -6.2917 -5.0970  
H -0.1454 -7.7004 -2.3980  
H 0.3745 -6.0833 -2.8011  
H -1.2131 -6.7655 -0.3796  
H -2.5924 -5.6377 -4.2861  
H -3.2983 -5.8976 0.6074  
H -4.6738 -4.7505 -3.2875  
H -5.3038 -4.7844 0.1566  
C 4.7645 -4.9604 -5.5655  
C 4.6504 -4.6816 -4.0811  
O 5.0429 -3.6302 -3.5781  
C 4.6256 -3.6919 -6.4069  
H 5.7558 -5.4066 -5.7220  
H 5.3270 -2.9334 -6.0542  
H 3.6164 -3.2758 -6.3242  
H 4.8238 -3.8973 -7.4619  
N 4.1326 -5.7051 -3.3475  
C 4.3478 -5.7979 -1.9139  
C 3.0964 -5.6622 -1.0504  
C 2.4107 -4.2896 -1.0741  
C 1.1900 -4.3281 -0.1531  
C 3.3614 -3.1502 -0.6848  
H 3.8826 -6.5501 -3.8395  
H 5.0685 -5.0208 -1.6552  
H 3.3897 -5.8897 -0.0161  
H 2.3692 -6.4336 -1.3379  
H 2.0717 -4.1013 -2.1013  
H 1.4858 -4.6022 0.8668  
H 0.6935 -3.3624 -0.0828  
H 0.4485 -5.0573 -0.4920  
H 4.1834 -3.0446 -1.3960  
H 3.7773 -3.3107 0.3174  
H 2.8226 -2.1972 -0.6709  
C 9.3609 -5.5684 -1.0418  
C 8.2440 -4.5712 -0.6905  
C 8.5353 -3.1396 -1.0958  
C 7.7713 -2.5017 -2.0800  
C 9.5650 -2.4147 -0.4751  
C 8.0228 -1.1690 -2.4252  
C 9.8206 -1.0878 -0.8173  
C 9.0436 -0.4555 -1.7941  
H 10.3037 -5.2906 -0.5608  
H 8.0644 -4.6082 0.3922  
H 7.3123 -4.8926 -1.1684  
H 6.9659 -3.0357 -2.5752  
H 10.1648 -2.8929 0.2956  
H 7.4209 -0.6986 -3.1987  
H 10.6078 -0.5263 -0.3249  
H 9.2505 0.5777 -2.0566  
C -2.7830 0.9538 0.2789  
C -1.5645 1.0796 -0.3108  
C -1.2792 2.2804 -1.0888  
N -0.0652 2.5203 -1.4893  
N -2.3551 3.1347 -1.3517  
C -3.5153 2.9251 -0.7748  
N -3.7479 1.8899 0.0710  
S 1.4608 -0.9274 -3.3125  
C 1.0364 -0.0155 -1.9470  
C -4.6720 3.8296 -1.0650  
N 0.0393 -0.5658 -1.2702  
C -0.4719 -1.7487 -1.8222

C -1.6561 -2.4315 -1.2299  
C 0.2066 -2.0966 -2.9577  
C -0.0416 -3.2429 -3.8829  
C -0.4777 0.0988 -0.0331  
H 1.3896 0.9769 -1.6876  
H 0.0131 3.4057 -1.9940  
H -0.7922 -0.6916 0.6456  
H 0.3848 0.6065 0.3983  
H -5.2664 3.3943 -1.8766  
H -5.3319 3.9063 -0.1985  
H -4.3166 4.8109 -1.3785  
H -3.0569 0.1306 0.9328  
H -1.6225 -2.4437 -0.1398  
H -1.7040 -3.4638 -1.5739  
H -2.5743 -1.9330 -1.5508  
H -0.7627 -3.9298 -3.4401  
H 0.8783 -3.7969 -4.0936  
C 2.6025 -1.7631 7.2547  
C 1.9745 -0.3808 7.4695  
C 2.4937 0.6453 6.4844  
O 2.2678 0.2766 5.2143  
O 3.0490 1.6824 6.7907  
C -7.6915 3.5022 3.9154  
C -7.0757 2.1926 3.4323  
C -6.5107 2.2558 2.0064  
O -6.9106 3.1607 1.2381  
O -5.6657 1.3444 1.7102  
H -8.0931 3.4000 4.9295  
H -6.9453 4.3040 3.9310  
H -7.8272 1.3904 3.4461  
H -6.2687 1.8574 4.0922  
C -0.1239 2.7658 4.8928  
C -0.1413 2.0114 3.5557  
C 1.0939 2.2547 2.7447  
C 1.2218 2.7840 1.4838  
N 2.3617 1.9537 3.2313  
C 3.2302 2.2909 2.2943  
N 2.5783 2.7875 1.2096  
H 0.7680 2.5310 5.4769  
H -0.2585 0.9383 3.7388  
H -1.0130 2.3079 2.9638  
H 0.5078 3.1150 0.7473  
H 4.3014 2.1886 2.3577  
H 3.0012 3.1552 0.3704  
C 6.0167 7.4068 1.3151  
C 6.0803 6.3445 2.4141  
C 6.4961 4.9408 1.9408  
C 6.5215 3.9643 3.1225  
C 5.5689 4.4343 0.8237  
H 5.2433 7.1811 0.5742  
H 5.0990 6.2674 2.9034  
H 6.7825 6.6685 3.1922  
H 7.5148 5.0058 1.5329  
H 5.5225 3.8588 3.5632  
H 6.8756 2.9717 2.8285  
H 7.1862 4.3277 3.9132  
H 4.5240 4.6021 1.1054  
H 5.6919 3.3566 0.6499  
H 5.7388 4.9552 -0.1233  
H -0.4548 -2.8921 -4.8348  
H -8.4954 3.8173 3.2509  
H 11.4707 5.7969 -1.6295  
H 12.6313 5.2764 -2.8652  
H -10.0746 2.6734 -4.7247  
H -9.2203 1.1772 -5.1387  
H -0.1300 3.8475 4.7269  
H -1.0055 2.5077 5.4866  
H 6.9730 7.4843 0.7841  
H 5.7900 8.3920 1.7339  
H 0.8870 -0.4426 7.3376  
H 2.1715 -0.0041 8.4750  
H 2.4591 -2.1080 6.2279  
H 2.1640 -2.4977 7.9364  
H 3.6803 -1.7336 7.4438  
H 9.1003 -6.5798 -0.7140  
H 9.5358 -5.5910 -2.1220  
H 4.8239 -6.7640 -1.7047

H 0.5029 -7.6249 -4.7637  
H -1.2475 -7.8866 -4.6920  
H 4.0329 -5.7178 -5.8716  
H 2.4713 1.0302 4.5432  
H -4.6590 1.7643 0.6348  
C 2.3115 6.5281 -4.1892  
C 1.2160 6.0427 -3.2614  
O 1.3016 4.9775 -2.6525  
N 0.1365 6.8779 -3.1755  
C -1.1526 6.3493 -2.7602  
C -1.8830 5.8507 -4.0153  
O -1.7840 6.4795 -5.0714  
N -2.5859 4.7154 -3.8616  
C -3.2640 4.0820 -4.9842  
C -3.4246 2.5801 -4.7337  
C -2.1044 1.8036 -4.5775  
C -2.3786 0.3869 -4.0649  
C -1.3000 1.7686 -5.8818  
H 3.2658 6.1011 -3.8781  
H 2.0910 6.1785 -5.2041  
H -0.9995 5.5619 -2.0229  
H -1.7421 7.1477 -2.2975  
H -4.0360 2.4308 -3.8355  
H -4.0032 2.1492 -5.5611  
H -1.4914 2.3119 -3.8254  
H -0.3598 1.2228 -5.7435  
H -1.8642 1.2667 -6.6778  
H -1.0466 2.7734 -6.2323  
H -3.0263 -0.1650 -4.7555  
H -2.8774 0.4002 -3.0918  
H -1.4470 -0.1772 -3.9606  
H -2.6846 4.2881 -5.8889  
C -4.5111 -2.5271 3.9349  
C -3.0727 -1.9920 3.9269  
O -2.8281 -0.7886 3.8972  
C -5.4450 -1.7258 3.0099  
C -5.2187 -2.0245 1.5433  
N -6.2043 -2.6603 0.8839  
O -4.1624 -1.6989 0.9629  
N -2.0720 -2.9100 4.0740  
C -0.7008 -2.4643 4.2707  
C -0.0319 -2.0489 2.9565  
O -0.4268 -2.4657 1.8654  
C -0.0029 -3.7343 4.8026  
C -0.7153 -4.8506 4.0236  
C -2.1748 -4.3697 3.9426  
N 1.0761 -1.2912 3.1122  
C 2.0296 -1.0926 2.0497  
C 3.4517 -1.3327 2.5502  
O 3.6970 -2.0344 3.5332  
N 4.4167 -0.7173 1.8293  
C 5.8426 -0.9016 2.0705  
C 6.4242 0.0427 3.1542  
O 7.4786 0.6507 2.9680  
C 6.5916 -0.7722 0.7572  
O 6.2111 0.4586 0.1291  
N 5.7106 0.0937 4.3024  
C 6.1828 0.8072 5.4835  
H -6.4848 -1.9394 3.2718  
H -5.2659 -0.6523 3.1273  
H -4.5551 -3.5925 3.6994  
H -0.1888 -3.8255 5.8774  
H 1.0771 -3.7109 4.6399  
H -0.6287 -5.8299 4.5002  
H -0.2984 -4.9183 3.0157  
H -2.7810 -4.7924 4.7534  
H -2.6347 -4.6435 2.9877  
H -0.6748 -1.6294 4.9760  
H 1.9592 -0.0875 1.6238  
H 1.8006 -1.8088 1.2576  
H 7.6642 -0.7956 0.9562  
H 6.3329 -1.6192 0.1132  
H 6.7125 0.4901 -0.6986  
H 5.9738 -1.9229 2.4476  
H 6.9623 1.5005 5.1694  
H 2.3846 7.6186 -4.2141  
H -4.2510 4.5383 -5.1361

H -2.5167 4.2098 -2.9722  
H 0.0439 7.5405 -3.9375  
H 6.6068 0.1127 6.2186  
H 5.3573 1.3561 5.9418  
H 4.9272 -0.5446 4.3999  
H 1.3536 -0.9688 4.0366  
H -7.0751 -2.9669 1.3210  
H -6.0853 -2.7991 -0.1134  
H 4.1776 -0.0893 1.0742  
H -4.8636 -2.4175 4.9672  
C -10.6092 -4.5354 2.8385  
C -9.6696 -4.0459 1.7583  
O -8.4636 -3.8969 1.9894  
C -10.7169 -3.4479 3.9120  
N -10.2301 -3.7191 0.5752  
C -9.4612 -3.1182 -0.4989  
C -8.2764 7.6108 2.5500  
C -8.2726 6.3050 1.7642  
C -8.1299 6.5020 0.2564  
N -7.7881 5.3656 -0.4121  
O -8.3336 7.5757 -0.3023  
H -9.7244 -3.2098 4.3018  
H -11.3475 -3.7764 4.7425  
H -11.1490 -2.5309 3.4998  
H -11.5954 -4.7857 2.4325  
H -8.6301 -3.7689 -0.7877  
H -7.4817 5.6302 2.1009  
H -9.2108 5.7586 1.9296  
H -7.5118 4.5213 0.0830  
H -7.6464 5.4385 -1.4076  
H -9.0467 8.2865 2.1697  
H -8.4615 7.4243 3.6128  
H -7.3173 8.1293 2.4558  
H -10.1817 -5.4475 3.2653  
H -9.0486 -2.1481 -0.2030  
H -10.1092 -2.9740 -1.3638  
H -11.2244 -3.8358 0.4610

## YI

C 11.5239 5.2217 -2.0493  
C 10.4290 4.1580 -2.2756  
C 9.9386 3.4430 -1.0409  
C 8.6387 3.1559 -0.6710  
N 10.8118 2.8836 -0.1225  
C 10.0518 2.2812 0.7739  
N 8.7252 2.4139 0.4939  
H 11.1511 6.0444 -1.4309  
H 10.8235 3.4072 -2.9746  
H 9.5666 4.6121 -2.7786  
H 7.6878 3.4175 -1.1083  
H 10.4006 1.7380 1.6406  
H 7.9669 1.9473 0.9858  
C -9.5455 1.8316 -4.3314  
C -8.4279 2.5694 -3.5729  
C -7.3739 1.6252 -3.0416  
C -6.3651 1.1263 -3.8777  
C -7.3960 1.1767 -1.7163  
C -5.4245 0.2103 -3.4165  
C -6.4636 0.2569 -1.2371  
C -5.4682 -0.2369 -2.0898  
O -4.5377 -1.1498 -1.7094  
H -10.0461 1.1122 -3.6752  
H -8.8640 3.1380 -2.7429  
H -7.9642 3.3025 -4.2444  
H -6.3108 1.4662 -4.9092  
H -8.1494 1.5658 -1.0355  
H -4.6393 -0.1644 -4.0644  
H -6.4932 -0.0497 -0.1996  
H -4.4822 -1.2769 -0.7303  
C -0.3969 -7.0483 -4.8434  
C -0.3939 -6.7612 -3.3381  
C -1.6466 -6.1113 -2.7805  
C -1.9003 -6.1745 -1.4042  
C -2.5724 -5.4248 -3.5774  
C -3.0309 -5.5905 -0.8412  
C -3.7138 -4.8389 -3.0313

C -3.9519 -4.9304 -1.6595  
O -5.1089 -4.3928 -1.1708  
H -0.4437 -6.1254 -5.4302  
H -0.2199 -7.6980 -2.7943  
H 0.4702 -6.1223 -3.1041  
H -1.2036 -6.7017 -0.7582  
H -2.4138 -5.3490 -4.6479  
H -3.2055 -5.6572 0.2301  
H -4.4257 -4.3065 -3.6519  
H -5.1023 -4.4325 -0.2046  
C 4.7873 -4.7002 -5.7888  
C 4.8492 -4.5543 -4.2828  
O 5.5457 -3.7044 -3.7341  
C 4.8605 -3.3486 -6.5004  
H 5.6450 -5.3222 -6.0780  
H 5.7371 -2.7959 -6.1574  
H 3.9772 -2.7421 -6.2775  
H 4.9226 -2.4783 -7.5841  
N 4.1064 -5.4631 -3.5904  
C 4.3569 -5.7226 -2.1863  
C 3.1235 -5.6456 -1.2930  
C 2.4870 -4.2553 -1.1811  
C 1.2571 -4.3265 -0.2754  
C 3.4870 -3.2033 -0.6863  
H 3.6213 -6.1715 -4.1212  
H 5.1045 -4.9954 -0.8717  
H 3.4212 -5.9839 -0.2907  
H 2.3702 -6.3647 -1.6440  
H 2.1577 -3.9536 -2.1817  
H 1.5357 -4.6452 0.7370  
H 0.7582 -3.3633 -0.1837  
H 0.5186 -5.0373 -0.6581  
H 4.3194 -3.0701 -1.3827  
H 3.8933 -3.4814 0.2946  
H 3.0006 -2.2304 -0.5894  
C 9.3589 -5.4558 -1.2622  
C 8.2483 -4.4617 -0.8793  
C 8.6203 -3.0091 -1.0981  
C 7.9794 -2.2454 -2.0817  
C 9.6092 -2.3960 -0.3146  
C 8.3156 -0.9003 -2.2689  
C 9.9488 -1.0568 -0.5044  
C 9.2998 -0.2980 -1.4826  
H 10.2698 -5.2721 -0.6841  
H 7.9868 -4.6132 0.1766  
H 7.3470 -4.6843 -1.4589  
H 7.2137 -2.7034 -2.6994  
H 10.1144 -2.9735 0.4560  
H 7.8161 -0.3290 -3.0476  
H 10.7152 -0.5947 0.1091  
H 9.5653 0.7440 -1.6256  
C -2.7548 0.8501 0.2375  
C -1.5054 1.0396 -0.3090  
C -1.3178 2.2468 -1.0435  
N -0.1051 2.6432 -1.4615  
N -2.3755 3.0595 -1.2967  
C -3.5625 2.7487 -0.7692  
N -3.7852 1.6957 0.0335  
S 1.9783 -0.7082 -2.9616  
C 1.4726 0.1401 -1.5456  
C -4.7356 3.6169 -1.1063  
N 0.3211 -0.4504 -1.1625  
C -0.1934 -1.5322 -1.9110  
C -1.4740 -2.1955 -1.5233  
C 0.6145 -1.8194 -2.9669  
C 0.4342 -2.8621 -4.0250  
C -0.3854 0.0968 0.0159  
H 0.6814 1.9846 -1.4445  
H 0.0074 3.4964 -2.0089  
H -0.7499 -0.7314 0.6226  
H 0.3807 0.6223 0.5837  
H -5.3302 3.1305 -1.8879  
H -5.3733 3.7261 -0.2298  
H -4.4123 4.5927 -1.4682  
H -2.9569 -0.0028 0.8798  
H -1.4868 -2.4633 -0.4635  
H -1.6142 -3.1106 -2.0983

H -2.3326 -1.5489 -1.7222  
H -0.3299 -3.5847 -3.7280  
H 1.3654 -3.4087 -4.2082  
C 2.4762 -2.1719 7.1542  
C 1.8440 -0.8175 7.4937  
C 2.3530 0.2783 6.5813  
O 2.0875 0.0109 5.2960  
O 2.9353 1.2789 6.9533  
C -7.8776 3.0848 3.9911  
C -7.1059 1.8726 3.4833  
C -6.3837 2.1450 2.1797  
O -6.4984 3.2041 1.5690  
O -5.6232 1.1425 1.7890  
H -8.3579 2.8609 4.9484  
H -7.2131 3.9394 4.1344  
H -7.7667 1.0109 3.3232  
H -6.3541 1.5367 4.2068  
C -0.3065 2.4231 4.9943  
C -0.2352 1.8547 3.5694  
C 1.0618 2.1400 2.8742  
C 1.2875 2.7117 1.6452  
N 2.2862 1.7858 3.4275  
C 3.2228 2.1270 2.5596  
N 2.6580 2.6855 1.4593  
H 0.5243 2.0720 5.6074  
H -0.3962 0.7711 3.6027  
H -1.0517 2.2572 2.9608  
H 0.6229 3.1056 0.8935  
H 4.2855 1.9933 2.6827  
H 3.1539 3.0019 0.6395  
C 5.7836 7.3325 1.6998  
C 5.8826 6.2972 2.8204  
C 6.4604 4.9346 2.4011  
C 6.4600 3.9767 3.5978  
C 5.6891 4.3382 1.2155  
H 5.0685 7.0299 0.9287  
H 4.8842 6.1313 3.2502  
H 6.4984 6.7000 3.6344  
H 7.5015 5.0823 2.0801  
H 5.4354 3.7964 3.9483  
H 6.9056 3.0110 3.3474  
H 7.0186 4.4012 4.4393  
H 4.6148 4.3637 1.4284  
H 5.9809 3.2994 1.0286  
H 5.8575 4.9037 0.2944  
H 0.1199 -2.4120 -4.9737  
H -8.6504 3.3820 3.2811  
H 12.3781 4.7766 -1.5334  
H 11.8625 5.6328 -3.0049  
H -10.2976 2.5307 -4.7111  
H -9.1354 1.2757 -5.1807  
H -0.2657 3.5167 4.9807  
H -1.2419 2.1207 5.4738  
H 6.7538 7.4812 1.2115  
H 5.4553 8.3023 2.0868  
H 0.7553 -0.8735 7.3715  
H 2.0555 -0.5230 8.5235  
H 2.3381 -2.4194 6.0996  
H 2.0415 -2.9696 7.7636  
H 3.5537 -2.1546 7.3469  
H 9.0421 -6.4870 -1.0759  
H 9.6142 -5.3605 -2.3220  
H 4.8142 -6.7171 -2.0866  
H 0.5170 -7.5755 -5.1340  
H -1.2509 -7.6702 -5.1288  
H 3.8875 -5.2521 -6.0866  
H 2.3178 0.7987 4.6704  
H -5.0026 1.4206 0.9976  
C 2.1351 6.6658 -3.8717  
C 0.9586 6.0519 -3.1513  
O 0.8954 4.8408 -2.9360  
N -0.0219 6.9222 -2.7722  
C -1.3487 6.3935 -2.5081  
C -1.9801 5.9065 -3.8234  
O -1.7423 6.4943 -4.8775  
N -2.7943 4.8399 -3.6846  
C -3.3932 4.1724 -4.8321

C -3.0632 2.6754 -4.8272  
C -1.5639 2.3448 -4.7700  
C -1.3593 0.8384 -4.5782  
C -0.8007 2.8735 -5.9887  
H 3.0260 6.0654 -3.6860  
H 1.9253 6.6477 -4.9467  
H -1.2882 5.5941 -1.7684  
H -1.9667 7.1934 -2.0902  
H -7.5605 2.2093 -3.9691  
H -3.5100 2.2205 -5.7223  
H -1.1471 2.8422 -3.8893  
H 0.2604 2.6115 -5.9214  
H -1.1946 2.4438 -6.9186  
H -0.8664 3.9631 -6.0618  
H -1.7497 0.2730 -5.4342  
H -1.8744 0.4798 -3.6804  
H -0.2980 0.5960 -4.4726  
H -3.0184 4.6742 -5.7262  
C -4.5985 -2.8862 3.7416  
C -3.1950 -2.2655 3.8232  
O -3.0325 -1.0493 3.8926  
C -5.5780 -2.0201 2.9360  
C -5.3429 -2.0981 1.4408  
N -6.3535 -2.5770 0.6890  
O -4.2734 -1.7273 0.9260  
N -2.1491 -3.1335 3.9283  
C -0.7976 -2.6444 4.1675  
C -0.1108 -2.2057 2.8662  
O -0.5054 -2.5963 1.7668  
C -0.0787 -3.8974 4.7098  
C -0.7171 -5.0230 3.8813  
C -2.1874 -4.5904 3.7393  
N 1.0000 -1.4562 3.0502  
C 1.9544 -1.2131 1.9949  
C 3.3800 -1.4247 2.4874  
O 3.6439 -2.1181 3.4748  
N 4.3295 -0.7908 1.7622  
C 5.7583 -0.9450 2.0168  
C 6.2809 -0.0036 3.1345  
O 7.2147 0.7778 2.9327  
C 6.5293 -0.7619 0.7230  
O 6.1574 0.4932 0.1419  
N 5.6489 -0.1601 4.3185  
C 6.0270 0.5395 5.5410  
H -6.6060 -2.3127 3.1651  
H -5.4303 -0.9719 3.2101  
H -4.5726 -3.9046 3.3466  
H -0.3059 -4.0144 5.7743  
H 1.0051 -3.8370 4.5916  
H -0.6194 -6.0070 4.3455  
H -0.2520 -5.0597 2.8932  
H -2.8196 -5.0626 4.5013  
H -2.5851 -4.8459 2.7520  
H -0.8190 -1.8133 4.8766  
H 1.8661 -0.2047 1.5843  
H 1.7468 -1.9109 1.1817  
H 7.6005 -0.7936 0.9346  
H 6.2833 -1.5829 0.0422  
H 6.5748 0.5157 -0.7312  
H 5.9129 -1.9714 2.3702  
H 6.8203 1.2447 5.2949  
H 2.3151 7.7018 -3.5733  
H -4.4829 4.3048 -4.8128  
H -2.6994 4.2965 -2.8235  
H -0.0174 7.8080 -3.2601  
H 6.3994 -0.1705 6.2876  
H 5.1703 1.0755 5.9580  
H 4.9318 -0.8803 4.3664  
H 1.2731 -1.1701 3.9876  
H -7.1984 -2.9964 1.0826  
H -6.2068 -2.6233 -0.3120  
H 4.0741 -0.1955 0.9840  
H -4.9601 -2.9617 4.7744  
C -10.5536 -4.9473 2.5248  
C -9.6585 -4.3256 1.4771  
O -8.4914 -4.0195 1.7487  
C -10.7880 -3.9045 3.6219

N -10.2212 -4.0558 0.2811  
C -9.5047 -3.3382 -0.7570  
C -8.5198 7.2456 2.8239  
C -8.4631 5.9503 2.0205  
C -8.4166 6.1664 0.5095  
N -8.0352 5.0557 -0.1956  
O -8.7396 7.2177 -0.0290  
H -9.8309 -3.5741 4.0308  
H -11.3911 -4.3174 4.4350  
H -11.3103 -3.0286 3.2243  
H -11.5021 -5.2894 2.0967  
H -8.6072 -3.8869 -1.0600  
H -7.6063 5.3366 2.3090  
H -9.3523 5.3396 2.2272  
H -7.5611 4.2932 0.2739  
H -7.8847 5.1777 -1.1859  
H -9.3580 7.8652 2.4969  
H -8.6303 7.0333 3.8915  
H -7.6077 7.8331 2.6840  
H -10.0370 -5.8199 2.9352  
H -9.1988 -2.3452 -0.4130  
H -10.1541 -3.2245 -1.6251  
H -11.1823 -4.3157 0.1262

### YIH<sup>+</sup>

C 11.4890 5.2541 -2.0447  
C 10.3850 4.1899 -2.2237  
C 9.9525 3.4694 -0.9707  
C 8.6716 3.1856 -0.5365  
N 10.8683 2.9033 -0.1001  
C 10.1522 2.3038 0.8339  
N 8.8135 2.4460 0.6240  
H 11.1460 6.0734 -1.4053  
H 10.7473 3.4422 -2.9428  
H 9.5005 4.6465 -2.6842  
H 7.7010 3.4469 -0.9274  
H 10.5435 1.7593 1.6816  
H 8.0799 2.0024 1.1718  
C -9.5597 1.7591 -4.3593  
C -8.4680 2.5286 -3.5950  
C -7.3853 1.6188 -3.0604  
C -6.3655 1.1395 -3.8959  
C -7.3839 1.1899 -1.7284  
C -5.3937 0.2607 -3.4272  
C -6.4187 0.3092 -1.2390  
C -5.4143 -0.1656 -2.0921  
O -4.4392 -1.0266 -1.7013  
H -10.0415 1.0243 -3.7061  
H -8.9255 3.0798 -2.7646  
H -8.0267 3.2794 -4.2627  
H -6.3300 1.4627 -4.9338  
H -8.1380 1.5706 -1.0440  
H -4.6044 -0.1032 -4.0765  
H -6.4222 0.0430 -0.1894  
H -4.4608 -1.2483 -0.7385  
C -0.3650 -7.0731 -4.8707  
C -0.3655 -6.7880 -3.3651  
C -1.5928 -6.0931 -2.8079  
C -1.7705 -6.0323 -1.4188  
C -2.5580 -5.4743 -3.6118  
C -2.8547 -5.3752 -0.8489  
C -3.6633 -4.8281 -3.0574  
C -3.8140 -4.7765 -1.6717  
O -4.9198 -4.1590 -1.1634  
H -0.3915 -6.1482 -5.4559  
H -0.2181 -7.7271 -2.8173  
H 0.5164 -6.1732 -3.1309  
H -1.0416 -6.5070 -0.7678  
H -2.4581 -5.4958 -4.6919  
H -2.9610 -5.3272 0.2318  
H -4.4034 -4.3419 -3.6830  
H -4.7583 -3.9645 -0.2289  
C 4.8083 -4.6972 -5.8062  
C 4.9409 -4.5953 -4.3012  
O 5.7575 -3.8511 -3.7659  
C 5.0711 -3.3600 -6.4995



|   |         |         |         |   |          |         |         |   |          |         |         |
|---|---------|---------|---------|---|----------|---------|---------|---|----------|---------|---------|
| H | 5.5481  | -5.4398 | -6.1343 | H | -7.2420  | 3.8634  | 4.1049  | H | -1.6745  | 0.2662  | -5.3805 |
| H | 6.0345  | -2.9592 | -6.1792 | H | -7.8135  | 0.9448  | 3.2765  | H | -1.7986  | 0.5114  | -3.6332 |
| H | 4.3022  | -2.6267 | -6.2378 | H | -6.3935  | 1.4553  | 4.1572  | H | -0.2272  | 0.6472  | -4.4332 |
| H | 5.0774  | -3.4770 | -7.5863 | C | -0.3362  | 2.3857  | 4.9795  | H | -3.0547  | 4.6373  | -5.7444 |
| N | 4.1176  | -5.4194 | -3.5979 | C | -0.2529  | 1.8247  | 3.5534  | C | -4.5993  | -2.9439 | 3.7141  |
| C | 4.3782  | -5.7267 | -2.2057 | C | 1.0437   | 2.1315  | 2.8681  | C | -3.1884  | -2.3357 | 3.7844  |
| C | 3.1514  | -5.6240 | -1.3053 | C | 1.2710   | 2.7466  | 1.6608  | O | -3.0101  | -1.1204 | 3.8346  |
| C | 2.5549  | -4.2178 | -1.1790 | N | 2.2679   | 1.7636  | 3.4127  | C | -5.5739  | -2.0477 | 2.9319  |
| C | 1.3226  | -4.2652 | -0.2773 | C | 3.2047   | -2.1347 | 2.5577  | C | -5.3714  | -2.1027 | 1.4327  |
| C | 3.5814  | -3.1975 | -0.6720 | N | 2.6412   | 2.7275  | 1.4754  | N | -6.4273  | -2.4804 | 0.6903  |
| H | 3.5282  | -6.0505 | -4.1215 | H | 0.5024   | 2.0498  | 5.5908  | O | -4.2802  | -1.8158 | 0.8983  |
| H | 5.1533  | -5.0391 | -1.8794 | H | -0.3991  | 0.7391  | 3.5812  | N | -2.1464  | -3.2083 | 3.8957  |
| H | 3.4446  | -5.9808 | -0.3085 | H | -1.0725  | 2.2208  | 2.9445  | C | -0.7949  | -2.7179 | 4.1335  |
| H | 2.3740  | -6.3165 | -1.6581 | H | 0.6058   | 3.1694  | 0.9263  | C | -0.1163  | -2.2507 | 2.8376  |
| H | 2.2351  | -3.8979 | -2.1769 | H | 4.2673   | 1.9986  | 2.6774  | O | -0.5114  | -2.6230 | 1.7316  |
| H | 1.5904  | -4.5929 | 0.7350  | H | 3.1375   | 3.0589  | 0.6623  | C | -0.0678  | -3.9749 | 4.6569  |
| H | 0.8412  | -3.2937 | -0.1859 | C | 5.7330   | 7.3305  | 1.6995  | C | -0.7177  | -5.0961 | 3.8320  |
| H | 0.5703  | -4.9575 | -0.6651 | C | 5.7940   | 6.3246  | 2.8488  | C | -2.1911  | -4.6667 | 3.7237  |
| H | 4.4284  | -3.0898 | -1.3557 | C | 6.4013   | 4.9574  | 2.4887  | N | 0.9895   | -1.4949 | 3.0316  |
| H | 3.9665  | -3.4870 | 0.3137  | C | 6.3517   | 4.0274  | 3.7060  | C | 1.9393   | -1.2179 | 1.9808  |
| H | 3.1243  | -2.2100 | -0.5809 | C | 5.6893   | 4.3293  | 1.2818  | C | 3.3695   | -1.4149 | 2.4669  |
| C | 9.3778  | -5.4353 | -1.2745 | H | 5.0631   | 6.9957  | 0.9015  | O | 3.6468   | -2.1188 | 3.4429  |
| C | 8.2181  | -4.4400 | -1.1040 | H | 4.7795   | 6.1586  | 3.2389  | N | 4.3063   | -0.7605 | 1.7433  |
| C | 8.6209  | -2.9785 | -1.1936 | H | 6.3696   | 6.7541  | 3.6784  | C | 5.7387   | -0.8990 | 1.9876  |
| C | 8.0279  | -2.1341 | -2.1421 | H | 7.4552   | 5.1061  | 2.2137  | C | 6.2510   | 0.0420  | 3.1100  |
| C | 9.5839  | -2.4345 | -0.3300 | H | 5.3139   | 3.8480  | 4.0152  | O | 7.1565   | 0.8580  | 2.9090  |
| C | 8.3952  | -0.7870 | -2.2284 | H | 6.8119   | 3.0601  | 3.4913  | C | 6.4996   | -0.7007 | 0.6902  |
| C | 9.9538  | -1.0924 | -0.4183 | H | 6.8708   | 4.4730  | 4.5617  | O | 6.0954   | 0.5416  | 0.1089  |
| C | 9.3623  | -0.2584 | -1.3714 | H | 4.6057   | 4.3874  | 1.4304  | N | 5.6417   | -0.1546 | 4.2991  |
| H | 10.1452 | -5.2953 | -0.5049 | H | 5.9621   | 3.2768  | 1.1489  | C | 6.0062   | 0.5338  | 5.5322  |
| H | 7.7366  | -4.6212 | -0.1328 | H | 5.9225   | 4.8570  | 0.3526  | H | -6.6040  | -2.3215 | 3.1724  |
| H | 7.4646  | -4.6378 | -1.8703 | H | 0.2070   | -2.2811 | -4.9248 | H | -5.4081  | -1.0010 | 3.2067  |
| H | 7.2778  | -2.5416 | -2.8115 | H | -8.6917  | 3.3116  | 3.2694  | H | -4.5878  | -3.9570 | 3.3039  |
| H | 10.0516 | -3.0688 | 0.4189  | H | 12.3684  | 4.8078  | -1.5736 | H | -0.2800  | -4.0988 | 5.7237  |
| H | 7.9385  | -0.1555 | -2.9869 | H | 11.7802  | 5.6695  | -3.0142 | H | 1.0143   | -3.9126 | 4.5248  |
| H | 10.7040 | -0.6878 | 0.2537  | H | -10.3306 | 2.4367  | -4.7406 | H | -0.6073  | -6.0836 | 4.2857  |
| H | 9.6600  | 0.7819  | -1.4440 | H | -9.1304  | 1.2169  | -5.2083 | H | -0.2723  | -5.1227 | 2.8342  |
| C | -2.8078 | 0.8486  | 0.3303  | H | -0.3183  | 3.4798  | 4.9696  | H | -2.8035  | -5.1311 | 4.5066  |
| C | -1.5743 | 1.0431  | -0.2333 | H | -1.2653  | 2.0628  | 5.4575  | H | -2.6160  | -4.9341 | 2.7511  |
| C | -1.4022 | 2.2526  | -0.9816 | H | 6.7235   | 7.4857  | 1.2562  | H | -0.8153  | -1.8972 | 4.8549  |
| N | -0.2029 | 2.6551  | -1.4122 | H | 5.3687   | 8.3031  | 2.0458  | H | 1.8397   | -0.2017 | 1.5912  |
| N | -2.4694 | 3.0564  | -1.2423 | H | 0.7236   | -0.9268 | 7.3393  | H | 1.7408   | -1.9017 | 1.1548  |
| C | -3.6474 | 2.7654  | -0.7060 | H | 2.0077   | -0.5573 | 8.5038  | H | 7.5716   | -0.7089 | 0.8999  |
| N | -3.8279 | 1.7119  | 0.1152  | H | 2.3399   | -2.4481 | 6.0816  | H | 6.2723   | -1.5315 | 0.0138  |
| S | 2.0079  | -0.5839 | -2.8383 | H | 2.0415   | -3.0024 | 7.7437  | H | 6.5675   | 0.6074  | -0.7332 |
| C | 1.4423  | 0.2304  | -1.4265 | H | 3.5429   | -2.1627 | 7.3370  | H | 5.9077   | -1.9253 | 2.3340  |
| C | -4.8313 | 3.6092  | -1.0371 | H | 0.0198   | -6.4664 | -1.2053 | H | 6.7874   | 1.2565  | 5.2991  |
| N | 0.2955  | -0.3939 | -1.0831 | H | 9.8598   | -5.3042 | -2.2485 | H | 2.2881   | 7.6841  | -3.5722 |
| C | -0.1756 | -1.4715 | -1.8651 | H | 4.7977   | -6.7405 | -2.1335 | H | -4.5117  | 4.2297  | -4.8329 |
| C | -1.4504 | -2.1697 | -1.5274 | H | 0.5391   | -7.6190 | -5.1562 | H | -2.7928  | 4.3194  | -2.8255 |
| C | 0.6682  | -1.7223 | -2.9021 | H | -1.2295  | -7.6777 | -5.1628 | H | -0.0567  | 7.7998  | -3.2979 |
| C | 0.5331  | -2.7447 | -3.9868 | H | 3.8248   | -5.0962 | -6.0810 | H | 6.3902   | -0.1817 | 6.2675  |
| C | -0.4466 | 0.1056  | 0.0904  | H | 2.2921   | 0.7684  | 4.6570  | H | 5.1401   | 1.0496  | 5.9552  |
| H | 0.6034  | 2.0209  | -1.3572 | H | -4.7678  | 1.5204  | 0.7495  | H | 4.9359   | -0.8870 | 4.3370  |
| H | -0.0960 | 3.5093  | -1.9628 | C | 2.0953   | 6.6525  | -3.8777 | H | 1.2572   | -1.2162 | 3.9725  |
| H | -0.8131 | -0.7437 | 0.6662  | C | 0.9188   | 6.0466  | -3.1457 | H | -7.2600  | -2.9161 | 1.0899  |
| H | 0.2920  | 0.6307  | 0.6945  | O | 0.8553   | 4.8406  | -2.8977 | H | -6.3049  | -2.5056 | -0.3138 |
| H | -5.4050 | 3.1165  | -1.8301 | N | -0.0676  | 6.9227  | -2.7943 | H | 4.0384   | -0.1626 | 0.9711  |
| H | -5.4804 | 3.6938  | -0.1623 | C | -1.3975  | 6.3979  | -2.5420 | H | -4.9499  | -3.0291 | 4.7495  |
| H | -4.5133 | 4.5906  | -1.3881 | C | -1.9998  | 5.8723  | -3.8565 | C | -10.5222 | -5.0338 | 2.4918  |
| H | -3.0298 | 0.0069  | 0.9806  | O | -1.7139  | 6.4104  | -4.9243 | C | -9.6420  | -4.3899 | 1.4462  |
| H | -1.4726 | -2.4889 | -0.4820 | N | -2.8483  | 4.8327  | -3.7049 | O | -8.4902  | -4.0380 | 1.7249  |
| H | -1.5642 | -3.0574 | -2.1476 | C | -3.4188  | 4.1321  | -4.8487 | C | -10.7833 | -3.9938 | 3.5848  |
| H | -2.3178 | -1.5299 | -1.7095 | C | -3.0437  | 2.6459  | -4.8289 | N | -10.2016 | -4.1516 | 0.2414  |
| H | -0.2062 | -3.5017 | -3.7127 | C | -1.5365  | 2.3571  | -4.7695 | C | -9.4971  | -3.4151 | -0.7916 |
| H | 1.4832  | -3.2536 | -4.1802 | C | -1.2945  | 0.8615  | -4.5406 | C | -8.5712  | 7.1689  | 2.8045  |
| C | 2.4672  | -2.1979 | 7.1370  | C | -0.7904  | 2.8725  | -6.0046 | C | -8.5356  | 5.8566  | 2.0288  |
| C | 1.8100  | -0.8543 | 7.4721  | H | 2.9823   | 6.0419  | -3.7085 | C | -8.5214  | 6.0341  | 0.5124  |
| C | 2.3147  | 0.2464  | 6.5647  | H | 1.8685   | 6.6464  | -4.9494 | N | -8.1475  | 4.9049  | -0.1647 |
| O | 2.0489  | -0.0166 | 5.2787  | H | -1.3509  | 5.6201  | -1.7780 | O | -8.8504  | 7.0728  | -0.0488 |
| O | 2.8945  | 1.2475  | 6.9398  | H | -2.0258  | 7.2068  | -2.1586 | H | -9.8351  | -3.6380 | 3.9930  |
| C | -7.9093 | 3.0099  | 3.9671  | H | -3.5286  | 2.1770  | -3.9651 | H | -11.3765 | -4.4187 | 4.3992  |
| C | -7.1437 | 1.7996  | 3.4364  | H | -3.4795  | 2.1681  | -5.7172 | H | -11.3266 | -3.1322 | 3.1843  |
| C | -6.4146 | 2.0629  | 2.1197  | H | -1.1295  | 2.8892  | -3.9039 | H | -11.4605 | -5.4014 | 2.0624  |
| O | -6.5578 | 3.1555  | 1.5383  | H | 0.2764   | 2.6354  | -5.9359 | H | -8.5603  | -3.9172 | -1.0516 |
| O | -5.6615 | 1.1025  | 1.7094  | H | -1.1786  | 2.4105  | -6.9212 | H | -7.6761  | 5.2443  | 2.3109  |
| H | -8.3783 | 2.7838  | 4.9307  | H | -0.8808  | 3.9580  | -6.1033 | H | -9.4223  | 5.2550  | 2.2689  |

H -7.6649 4.1564 0.3267  
H -8.0195 4.9963 -1.1613  
H -9.4084 7.7893 2.4756  
H -8.6695 6.9794 3.8776  
H -7.6558 7.7459 2.6419  
H -9.9837 -5.8915 2.9056  
H -9.2618 -2.3976 -0.4629  
H -10.1238 -3.3605 -1.6820  
H -11.1534 -4.4398 0.0796

## TC

C 11.4701 5.0422 -2.3640  
C 10.3633 3.9817 -2.5414  
C 9.8771 3.3168 -1.2774  
C 8.5792 3.0275 -0.8992  
N 10.7539 2.8078 -0.3345  
C 9.9992 2.2344 0.5855  
N 8.6723 2.3356 0.2944  
H 11.1114 5.8901 -1.7718  
H 10.7453 3.2016 -3.2146  
H 9.5013 4.4253 -3.0542  
H 7.6265 3.2472 -1.3558  
H 10.3529 1.7361 1.4768  
H 7.9139 1.9105 0.8228  
C -9.6115 1.4868 -4.2485  
C -8.1883 2.0394 -4.0592  
C -7.2556 1.0622 -3.3783  
C -6.6923 -0.0088 -4.0863  
C -6.9509 1.1742 -2.0176  
C -5.8520 -0.9262 -3.4655  
C -6.1074 0.2631 -1.3785  
C -5.5422 -0.7892 -2.1057  
O -4.6903 -1.6995 -1.5587  
H -10.0605 1.2392 -3.2812  
H -8.2357 2.9637 -3.4716  
H -7.7794 2.3164 -5.0391  
H -6.9067 -0.1193 -5.1468  
H -7.3712 1.9831 -1.4293  
H -5.3983 -1.7385 -4.0234  
H -5.8788 0.3768 -0.3257  
H -4.4943 -1.5007 -0.6063  
C -0.4306 -7.3693 -4.5537  
C -0.1658 -6.0037 -3.9048  
C -1.3424 -5.5567 -3.0713  
C -1.4139 -5.8838 -1.7133  
C -2.4387 -4.8978 -3.6451  
C -2.5456 -5.5928 -0.9549  
C -3.5781 -4.6006 -2.9034  
C -3.6406 -4.9708 -1.5577  
O -4.8073 -4.7353 -0.8855  
H -1.3110 -7.3235 -5.2019  
H 0.7313 -6.0575 -3.2758  
H 0.0449 -5.2620 -4.6852  
H -0.5749 -6.3856 -1.2392  
H -2.4015 -4.6147 -4.6940  
H -2.5815 -5.8568 0.0994  
H -4.4201 -4.0769 -3.3391  
H -4.6737 -4.8671 0.0626  
C 4.7306 -5.0366 -5.6513  
C 5.0252 -5.0274 -4.1758  
O 5.9764 -4.4060 -3.7015  
C 4.8243 -3.6300 -6.2512  
H 5.4763 -5.6875 -6.1250  
H 5.7943 -3.1903 -6.0112  
H 4.0478 -2.9775 -5.8389  
H 4.7056 -3.6576 -7.3375  
N 4.1751 -5.7710 -3.4290  
C 4.3506 -5.9285 -2.0084  
C 3.1406 -5.4894 -1.1898  
C 2.7047 -4.0324 -1.3878  
C 1.4923 -3.7562 -0.5034  
C 3.8314 -3.0302 -1.1030  
H 3.4117 -6.2453 -3.8864  
H 5.2298 -5.3421 -1.7435  
H 3.3791 -5.6521 -0.1299  
H 2.2887 -6.1491 -1.4104

H 2.4022 -3.9060 -2.4369  
H 1.7215 -3.9523 0.5496  
H 1.1750 -2.7190 -0.5932  
H 0.6378 -4.3820 -0.7725  
H 4.6871 -3.1667 -1.7703  
H 4.1856 -3.1301 -0.0692  
H 3.4677 -2.0051 -1.2333  
C 9.3629 -5.6078 -1.1594  
C 8.2032 -4.6088 -1.0010  
C 8.6031 -3.1556 -1.1731  
C 8.0192 -2.3705 -2.1768  
C 9.5556 -2.5600 -0.3327  
C 8.3810 -1.0281 -2.3333  
C 9.9227 -1.2242 -0.4934  
C 9.3364 -0.4479 -1.4968  
H 10.1559 -5.4256 -0.4271  
H 7.7543 -4.7429 -0.0065  
H 7.4267 -4.8405 -1.7349  
H 7.2906 -2.8216 -2.8423  
H 10.0169 -3.1508 0.4550  
H 7.9329 -0.4423 -3.1326  
H 10.6672 -0.7798 0.1598  
H 9.6309 0.5876 -1.6254  
C -3.0937 1.2412 0.7504  
C -1.8657 1.1475 0.1457  
C -1.5602 2.1252 -0.8360  
N -0.3434 2.1404 -1.4348  
N -2.4766 3.0505 -1.1916  
C -3.6616 3.0424 -0.5617  
N -3.9976 2.1907 0.4143  
S 1.6315 0.5969 -2.5991  
C 0.6797 1.1197 -1.1208  
C -4.6975 4.0267 -1.0183  
N 0.0764 -0.0981 -0.6338  
C -0.2178 -1.0046 -1.6890  
C -1.2803 -2.0339 -1.4784  
C 0.5580 -0.8369 -2.7764  
C 0.6850 -1.6805 -4.0013  
C -0.8408 0.1058 0.4813  
H 1.3778 1.5248 -0.3841  
H -0.0811 2.9299 -2.0255  
H -1.3044 -0.8389 0.7592  
H -0.2484 0.4209 1.3436  
H -5.2266 3.6089 -1.8828  
H -5.4408 4.1980 -0.2424  
H -4.2378 4.9662 -1.3277  
H -3.3907 0.5290 1.5152  
H -1.1525 -2.5503 -0.5242  
H -1.2600 -2.7806 -2.2703  
H -2.2756 -1.5792 -1.4885  
H 0.0191 -2.5450 -3.9408  
H 1.7106 -2.0568 -4.1166  
C 2.5735 -2.0457 7.2196  
C 1.9084 -0.6957 7.5129  
C 2.4009 0.3674 6.5561  
O 2.0789 0.0746 5.2897  
O 3.0259 1.3601 6.8778  
C -7.8433 3.0504 4.0004  
C -8.2462 2.2471 2.7536  
C -7.2048 2.3915 1.6653  
O -7.3993 3.0213 0.6289  
O -6.0606 1.8088 1.9669  
H -8.5952 2.9419 4.7872  
H -6.8838 2.6979 4.3864  
H -9.2034 2.5895 2.3545  
H -8.3345 1.1862 3.0122  
C -0.2571 2.4560 4.9294  
C -0.1640 1.9583 3.4818  
C 1.1519 2.2755 2.8399  
C 1.4370 3.0161 1.7175  
N 2.3458 1.8075 3.3737  
C 3.3222 2.2483 2.6029  
N 2.8160 2.9814 1.5789  
H 0.5602 2.0694 5.5374  
H -0.3252 0.8745 3.4678  
H -0.9672 2.3937 2.8786  
H 0.8046 3.5464 1.0229

H 4.3761 2.0669 2.7394  
H 3.3654 3.4648 0.8837  
C 5.7686 7.2660 1.3793  
C 6.6616 6.5491 2.3951  
C 7.0818 5.1209 2.0034  
C 7.8970 4.4792 3.1325  
C 5.8645 4.2551 1.6613  
H 4.7911 6.7833 1.2838  
H 6.1412 6.5047 3.3624  
H 7.5677 7.1439 2.5660  
H 7.7187 5.1781 1.1095  
H 7.2980 4.4146 4.0494  
H 8.2109 3.4658 2.8741  
H 8.7903 5.0712 3.3582  
H 5.1445 4.2906 2.4866  
H 6.1461 3.2106 1.5040  
H 5.3625 4.6169 0.7557  
H 0.4370 -1.1257 -4.9140  
H -7.7496 4.1144 3.7689  
H 12.3263 4.6086 -1.8414  
H 11.8020 5.4152 -3.3374  
H -10.2573 2.2152 -4.7498  
H -9.5968 0.5726 -4.8511  
H -0.2123 3.5486 4.9709  
H -1.2020 2.1344 5.3769  
H 6.2309 7.2802 0.3852  
H 5.5910 8.3043 1.6763  
H 0.8217 -0.7816 7.3942  
H 2.1175 -0.3589 8.5301  
H 2.4382 -2.3304 6.1738  
H 2.1587 -2.8326 7.8561  
H 3.6502 -1.9948 7.4103  
H 9.0102 -6.6351 -1.0237  
H 9.8069 -5.5278 -2.1563  
H 4.5853 -6.9774 -1.7796  
H 0.4201 -7.7005 -5.1601  
H -0.6226 -8.1292 -3.7899  
H 3.7491 -5.4801 -5.8548  
H 2.3367 0.8232 4.6335  
H -5.3260 2.0407 1.2724  
C 2.0523 6.3812 -4.1166  
C 0.9569 5.7946 -3.2389  
O 1.0247 4.6649 -2.7496  
N -0.1069 6.6307 -3.0480  
C -1.3933 6.0843 -2.6503  
C -2.1305 5.6184 -3.9140  
O -2.0947 6.3062 -4.9352  
N -2.7659 4.4391 -3.7993  
C -3.4766 3.8323 -4.9138  
C -3.6354 2.3253 -4.7057  
C -2.3215 1.5397 -4.5443  
C -2.6264 0.0565 -4.3217  
C -1.3669 1.7395 -5.7257  
H 3.0074 5.9198 -3.8636  
H 1.8227 6.1475 -5.1618  
H -1.2370 5.2760 -1.9372  
H -1.9815 6.8693 -2.1644  
H -4.2683 2.1409 -3.8279  
H -4.1925 1.9235 -5.5620  
H -1.8096 1.9053 -3.6473  
H -0.4506 1.1588 -5.5785  
H -1.8289 1.4118 -6.6655  
H -1.0724 2.7868 -5.8411  
H -3.1603 -0.3665 -5.1816  
H -3.2551 -0.0921 -3.4413  
H -1.7077 -0.5120 -4.1738  
H -2.9261 4.0587 -5.8310  
C -4.5409 -2.9126 3.9269  
C -3.1376 -2.2814 3.9571  
O -2.9763 -1.0622 3.9486  
C -5.5375 -2.0529 3.1219  
C -5.2814 -2.1268 1.6245  
N -6.1097 -2.9075 0.9072  
O -4.3305 -1.5190 1.0974  
N -2.0832 -3.1360 4.0840  
C -0.7302 -2.6228 4.2685  
C -0.0664 -2.2567 2.9312

O -0.4324 -2.7590 1.8703  
 C 0.0095 -3.8302 4.8806  
 C -0.6460 -5.0178 4.1594  
 C -2.1222 -4.6036 4.0317  
 N 0.9855 -1.4107 3.0603  
 C 1.9236 -1.1500 1.9938  
 C 3.3602 -1.3564 2.4643  
 O 3.6396 -2.0156 3.4704  
 N 4.3044 -0.7566 1.7001  
 C 5.7342 -0.8917 1.9639  
 C 6.2218 0.1198 3.0331  
 O 6.9943 1.0456 2.7608  
 C 6.5177 -0.7853 0.6665  
 O 6.1093 0.3936 -0.0311  
 N 5.7342 -0.1365 4.2672  
 C 6.0912 0.6190 5.4627  
 H -6.5566 -2.3864 3.3362  
 H -5.4247 -1.0080 3.4200  
 H -4.5198 -3.9331 3.5367  
 H -0.1834 -3.8680 5.9576  
 H 1.0890 -3.7747 4.7253  
 H -0.5272 -5.9642 4.6919  
 H -0.2121 -5.1234 3.1623  
 H -2.7255 -5.0048 4.8558  
 H -2.5545 -4.9520 3.0884  
 H -0.7512 -1.7489 4.9240  
 H 1.8201 -0.1315 1.6082  
 H 1.6980 -1.8238 1.1675  
 H 7.5865 -0.7583 0.8961  
 H 6.3211 -1.6747 0.0589  
 H 6.5376 0.3491 -0.8982  
 H 5.8894 -1.8950 2.3753  
 H 6.8005 1.3935 5.1694  
 H 2.1243 7.4666 -4.0136  
 H -4.4665 4.2952 -5.0243  
 H -2.6584 3.9168 -2.9279  
 H -0.1952 7.3792 -3.7251  
 H 6.5641 -0.0389 6.1991  
 H 5.2069 1.0811 5.9102  
 H 5.0661 -0.9007 4.3438  
 H 1.2522 -1.0893 3.9876  
 H -6.9382 -3.3525 1.3039  
 H -5.9257 -2.9941 -0.0873  
 H 4.0508 -0.1929 0.8991  
 H -4.8826 -2.9788 4.9668  
 C -10.4322 -5.0490 2.8871  
 C -9.5629 -4.4586 1.7964  
 O -8.3885 -4.1488 2.0254  
 C -10.7269 -3.9594 3.9244  
 N -10.1688 -4.2219 0.6125  
 C -9.5020 -3.5485 -0.4884  
 C -8.5188 7.1631 2.6904  
 C -8.0361 6.0928 1.7179  
 C -8.0018 6.5856 0.2705  
 N -7.9814 5.5871 -0.6566  
 O -7.9843 7.7745 -0.0246  
 H -9.7908 -3.5538 4.3153  
 H -11.3077 -4.3602 4.7594  
 H -11.2954 -3.1371 3.4789  
 H -11.3620 -5.4630 2.4817  
 H -8.7850 -4.2069 -0.9910  
 H -7.0166 5.7732 1.9732  
 H -8.6525 5.1903 1.7733  
 H -7.9026 4.6171 -0.3764  
 H -7.8549 5.8486 -1.6221  
 H -9.5620 7.4279 2.4947  
 H -8.4417 6.8157 3.7254  
 H -7.9264 8.0733 2.5764  
 H -9.8746 -5.8688 3.3489  
 H -8.9605 -2.6741 -0.1198  
 H -10.2487 -3.2222 -1.2131  
 H -11.1215 -4.5268 0.4907

TCH<sup>+</sup>

C 11.4927 5.0532 -2.3524  
 C 10.3895 3.9902 -2.5373

C 9.8938 3.3257 -1.2767  
 C 8.5933 3.0330 -0.9101  
 N 10.7633 2.8200 -0.3252  
 C 10.0019 2.2452 0.5884  
 N 8.6774 2.3423 0.2849  
 H 11.1276 5.9012 -1.7642  
 H 10.7785 3.2099 -3.2062  
 H 9.5309 4.4314 -3.0579  
 H 7.6443 3.2492 -1.3760  
 H 10.3489 1.7483 1.4831  
 H 7.9156 1.9138 0.8056  
 C -9.5891 1.5128 -4.2630  
 C -8.2081 2.1053 -3.9333  
 C -7.2682 1.1046 -3.2974  
 C -6.6595 0.1020 -4.0656  
 C -7.0042 1.1239 -1.9237  
 C -5.8107 -0.8364 -3.4900  
 C -6.1534 0.1887 -1.3293  
 C -5.5384 -0.7903 -2.1162  
 O -4.6717 -1.7153 -1.6159  
 H -10.0783 1.1483 -3.3541  
 H -8.3334 2.9605 -3.2593  
 H -7.7599 2.4990 -4.8547  
 H -6.8450 0.0618 -5.1365  
 H -7.4535 1.8787 -1.2857  
 H -5.3246 -1.5970 -4.0923  
 H -5.9707 0.2301 -0.2615  
 H -4.4901 -1.5715 -0.6519  
 C -0.4118 -7.3463 -4.5886  
 C -0.1469 -5.9829 -3.9353  
 C -1.3239 -5.5378 -3.1012  
 C -1.4108 -5.9004 -1.7531  
 C -2.4072 -4.8505 -3.6664  
 C -2.5437 -5.6123 -0.9956  
 C -3.5482 -4.5565 -2.9259  
 C -3.6247 -4.9584 -1.5900  
 O -4.7911 -4.7204 -0.9173  
 H -1.2919 -7.2980 -5.2369  
 H 0.7502 -6.0382 -3.3063  
 H 0.0638 -5.2390 -4.7136  
 H -0.5843 -6.4302 -1.2874  
 H -2.3583 -5.4422 -4.7077  
 H -2.5912 -5.9028 0.0512  
 H -4.3788 -4.0081 -3.3527  
 H -4.6648 -4.8936 0.0250  
 C 4.7512 -5.0125 -5.6752  
 C 5.0290 -4.9892 -4.1968  
 O 5.9552 -4.3365 -3.7151  
 C 4.7871 -3.6034 -6.2758  
 H 5.5314 -5.6286 -6.1399  
 H 5.7341 -3.1200 -6.0276  
 H 3.9780 -2.9863 -5.8716  
 H 4.6799 -3.6371 -7.3630  
 N 4.1937 -5.7552 -3.4560  
 C 4.3682 -5.9154 -2.0354  
 C 3.1482 -5.5041 -1.2173  
 C 2.6929 -4.0513 -1.4018  
 C 1.4769 -3.7979 -0.5156  
 C 3.8064 -3.0370 -1.1066  
 H 3.4553 -6.2608 -3.9210  
 H 5.2340 -5.3117 -1.7651  
 H 3.3850 -5.6742 -0.1582  
 H 2.3070 -6.1737 -1.4483  
 H 2.3901 -3.9195 -2.4500  
 H 1.7070 -4.0017 0.5356  
 H 1.1494 -2.7630 -0.5949  
 H 0.6281 -4.4286 -0.7910  
 H 4.6607 -3.1504 -1.7796  
 H 4.1669 -3.1466 -0.0759  
 H 3.4267 -2.0156 -1.2192  
 C 9.3800 -5.5995 -1.1818  
 C 8.2204 -4.6004 -1.0233  
 C 8.6229 -3.1468 -1.1854  
 C 8.0418 -2.3541 -2.1846  
 C 9.5759 -2.5588 -0.3401  
 C 8.4076 -1.0118 -2.3329  
 C 9.9465 -1.2228 -0.4922

C 9.3637 -0.4392 -1.4919  
 H 10.1691 -5.4224 -0.4442  
 H 7.7668 -4.7397 -0.0317  
 H 7.4464 -4.8271 -1.7615  
 H 7.3120 -2.7987 -2.8530  
 H 10.0351 -3.1554 0.4443  
 H 7.9628 -0.4202 -3.1296  
 H 10.6913 -0.7844 0.1647  
 H 9.6616 0.5959 -1.6148  
 C -3.1860 1.1671 0.7887  
 C -1.9560 1.1065 0.1974  
 C -1.6581 2.1019 -0.7782  
 N -0.4376 2.1473 -1.3512  
 N -2.5898 3.0120 -1.1466  
 C -3.7820 2.9876 -0.5486  
 N -4.0887 2.1114 0.4229  
 S 1.5865 0.6577 -2.5033  
 C 0.6051 1.1357 -1.0344  
 C -4.8311 3.9583 -0.9896  
 N 0.0143 -0.0940 -0.5738  
 C -0.2352 -1.0022 -1.6396  
 C -1.2774 2.0563 -1.4574  
 C 0.5565 -0.8045 -2.7102  
 C 0.7325 -1.6341 -3.9387  
 C -0.9169 0.0763 0.5328  
 H 1.2757 1.5537 -0.2806  
 H -0.1911 2.9207 -1.9695  
 H -1.3728 -0.8777 0.7905  
 H -0.3416 0.3876 1.4074  
 H -5.0985 3.7450 -2.0294  
 H -5.7314 3.8666 -0.3811  
 H -4.4389 4.9780 -0.9555  
 H -3.5034 0.4585 1.5473  
 H -1.1664 -2.5673 -0.4982  
 H -1.2136 -2.8046 -2.2452  
 H -2.2828 -1.6264 -1.5020  
 H 0.0899 -2.5171 -3.8986  
 H 1.7704 -1.9804 -4.0341  
 C 2.5860 -2.0600 7.2031  
 C 1.9087 -0.7149 7.4919  
 C 2.4031 0.3488 6.5372  
 O 2.0764 0.0597 5.2707  
 O 3.0363 1.3365 6.8579  
 C -7.8262 3.0505 3.9920  
 C -8.2387 2.2321 2.7592  
 C -7.1946 2.3466 1.6526  
 O -7.4427 3.0353 0.6379  
 O -6.0860 1.7365 1.8685  
 H -8.5600 2.9453 4.7969  
 H -6.8556 2.7080 4.3612  
 H -9.2003 2.5745 2.3682  
 H -8.3332 1.1766 3.0390  
 C -0.2410 2.4498 4.9247  
 C -0.1460 1.9581 3.4756  
 C 1.1694 2.2812 2.8357  
 C 1.4577 3.0593 1.7398  
 N 2.3605 1.7854 3.3491  
 C 3.3385 2.2454 2.5915  
 N 2.8359 3.0181 1.5956  
 H 0.5788 2.0652 5.5304  
 H -0.3042 0.8742 3.4596  
 H -0.9508 2.3950 2.8753  
 H 0.8289 3.6263 1.0716  
 H 4.3914 2.0513 2.7187  
 H 3.3885 3.5215 0.9173  
 C 5.7894 7.2680 1.3936  
 C 6.6924 6.5541 2.4028  
 C 7.1076 5.1243 2.0115  
 C 7.9324 4.4841 3.1344  
 C 5.8869 4.2584 1.6829  
 H 4.8099 6.7869 1.3113  
 H 6.1820 6.5136 3.3756  
 H 7.6006 7.1489 2.5620  
 H 7.7362 5.1782 1.1115  
 H 7.3427 4.4244 4.0576  
 H 8.2404 3.4689 2.8757  
 H 8.8299 5.0739 3.3488

|   |          |         |         |   |          |         |         |   |          |         |         |
|---|----------|---------|---------|---|----------|---------|---------|---|----------|---------|---------|
| H | 5.1747   | 4.2946  | 2.5152  | N | 5.7478   | -0.1476 | 4.2621  | H | 10.7401  | 1.4887  | 1.5814  |
| H | 6.1675   | 3.2139  | 1.5245  | C | 6.1062   | 0.6085  | 5.4569  | H | 8.2657   | 1.9769  | 1.3822  |
| H | 5.3772   | 4.6194  | 0.7810  | H | -6.5459  | -2.4200 | 3.3024  | C | -9.5789  | 1.7387  | -4.3840 |
| H | 0.4878   | -1.0788 | -4.8519 | H | -5.4375  | -1.0263 | 3.3549  | C | -8.5383  | 2.5447  | -3.5861 |
| H | -7.7413  | 4.1139  | 3.7526  | H | -4.5050  | -3.9453 | 3.5421  | C | -7.4597  | 1.6611  | -3.0026 |
| H | 12.3455  | 4.6221  | -1.8223 | H | -0.1615  | -3.8056 | 5.9926  | C | -6.4492  | 1.1339  | -3.8204 |
| H | 11.8315  | 5.4255  | -3.3236 | H | 1.1006   | -3.7505 | 4.7482  | C | -7.4611  | 1.2905  | -1.6537 |
| H | -10.2412 | 2.2593  | -4.7279 | H | -0.5101  | -5.9411 | 4.7934  | C | -5.4942  | 0.2561  | -3.3193 |
| H | -9.4953  | 0.6665  | -4.9516 | H | -0.2168  | -5.1439 | 3.2361  | C | -6.5102  | 0.4118  | -1.1326 |
| H | -0.2017  | 3.5425  | 4.9701  | H | -2.7031  | -4.9620 | 4.9701  | C | -5.5226  | -0.1208 | -1.9704 |
| H | -1.1840  | 2.1223  | 5.3714  | H | -2.5667  | -4.9953 | 3.1996  | O | -4.5873  | -1.0145 | -1.5561 |
| H | 6.2406   | 7.2770  | 0.3943  | H | -0.7446  | -1.7237 | 4.9042  | H | -10.0690 | 0.9999  | -3.7418 |
| H | 5.6170   | 8.3080  | 1.6878  | H | 1.8229   | -0.1765 | 1.5559  | H | -9.0381  | 3.0954  | -2.7809 |
| H | 0.8237   | -0.8085 | 7.3645  | H | 1.7175   | -1.8820 | 1.1645  | H | -8.0871  | 3.2970  | -4.2453 |
| H | 2.1082   | -0.3766 | 8.5104  | H | 7.6000   | -0.7744 | 0.8974  | H | -6.4111  | 1.4155  | -4.8699 |
| H | 2.4647   | -2.3427 | 6.1551  | H | 6.3377   | -1.6950 | 0.0601  | H | -8.2135  | 1.7082  | -0.9890 |
| H | 2.1692   | -2.8513 | 7.8327  | H | 6.5636   | 0.3261  | -0.9042 | H | -4.7146  | -0.1499 | -3.9550 |
| H | 3.6600   | -2.0021 | 7.4069  | H | 5.8975   | -1.9043 | 2.3752  | H | -6.5222  | 0.1605  | -0.0795 |
| H | 9.0258   | -6.6273 | -1.0542 | H | 6.8123   | 1.3852  | 5.1618  | H | -4.5204  | -1.0947 | -0.5683 |
| H | 9.8296   | -5.5138 | -2.1757 | H | 2.2196   | 7.4653  | -3.9008 | C | -0.4729  | -7.1960 | -4.6371 |
| H | 4.6238   | -6.9604 | -1.8114 | H | -4.4455  | 4.3069  | -5.0534 | C | -0.4737  | -6.8707 | -3.1396 |
| H | 0.4390   | -7.6760 | -5.1956 | H | -2.7342  | -3.9694 | -2.8956 | C | -1.7332  | -6.2083 | -2.6075 |
| H | -0.6044  | -8.1086 | -3.8273 | H | -0.1446  | 7.4113  | -3.6439 | C | -1.9293  | -6.0999 | -1.2233 |
| H | 3.7934   | -5.5006 | -5.8894 | H | 6.5830   | -0.0485 | 6.1915  | C | -2.7254  | -5.6754 | -3.4412 |
| H | 2.3442   | 0.8028  | 4.6140  | H | 5.2217   | 1.0677  | 5.9071  | C | -3.0627  | -5.4942 | -0.6881 |
| H | -5.0865  | 2.0483  | 0.9911  | H | 5.0824   | -0.9140 | 4.3399  | C | -3.8691  | -5.0687 | -2.9229 |
| C | 2.0767   | 6.4017  | -4.1076 | H | 1.2635   | -1.0938 | 3.9655  | C | -4.0475  | -4.9838 | -1.5412 |
| C | 0.9863   | 5.7973  | -3.2335 | H | -6.9738  | -3.3561 | 1.2758  | O | -5.2029  | -4.4213 | -1.0829 |
| O | 1.0351   | 4.6480  | -2.7910 | H | -5.9658  | -3.0218 | -0.1217 | H | -0.5398  | -6.2902 | -5.2485 |
| N | -0.0616  | 6.6439  | -2.9875 | H | 4.0631   | -0.2132 | 0.8831  | H | -0.2998  | -7.7927 | -2.5711 |
| C | -1.3522  | 6.0791  | -2.6328 | H | -4.8613  | -2.9517 | 4.9462  | H | 0.3880   | -6.2248 | -2.9180 |
| C | -2.0423  | 5.5903  | -3.9158 | C | -10.4691 | -5.0421 | 2.8367  | H | -1.1815  | -6.5029 | -0.5461 |
| O | -1.8967  | 6.2154  | -4.9664 | C | -9.5808  | -4.4698 | 1.7520  | H | -2.6177  | -5.7365 | -4.5189 |
| N | -2.7801  | 4.4726  | -3.7809 | O | -8.3944  | -4.2079 | 1.9808  | H | -3.1841  | -5.4190 | 0.3897  |
| C | -3.4527  | 3.8576  | -4.9167 | C | -10.7128 | -3.9578 | 3.8925  | H | -4.6321  | -4.6590 | -3.5754 |
| C | -3.5949  | 2.3472  | -4.7258 | N | -10.1782 | -4.1971 | 0.5722  | H | -5.1724  | -4.3311 | -0.1197 |
| C | -2.2756  | 1.5854  | -4.5080 | C | -9.4846  | -3.5340 | -0.5182 | C | 4.7261   | -4.8981 | -5.6236 |
| C | -2.5592  | 0.0913  | -4.3359 | C | -8.4990  | 7.1674  | 2.6940  | C | 4.6605   | -4.6658 | -4.1270 |
| C | -1.2560  | 1.8357  | -5.6236 | C | -7.8828  | 6.1819  | 1.7062  | O | 5.1593   | -6.6773 | -3.5921 |
| H | 3.0113   | 5.8624  | -3.9517 | C | -8.1617  | 6.5616  | 0.2517  | C | 4.6482   | -3.5916 | -6.4138 |
| H | 1.7787   | 6.2916  | -5.1559 | N | -8.2397  | 5.4976  | -0.5921 | H | 5.6855   | -5.3952 | -5.8189 |
| H | -1.2103  | 5.2773  | -1.9090 | O | -8.2847  | 7.7255  | -0.1162 | H | 5.4008   | -2.8912 | -6.0467 |
| H | -1.9683  | 6.8557  | -2.1686 | H | -9.7590  | -3.5994 | 4.2862  | H | 3.6677   | -3.1192 | -6.2943 |
| H | -4.2671  | 2.1419  | -3.8822 | H | -11.3083 | -4.3462 | 4.7231  | H | 4.8140   | -3.7659 | -7.4799 |
| H | -4.1029  | 1.9438  | -5.6114 | H | -11.2459 | -3.1044 | 3.4621  | N | 4.0508   | -5.6598 | -3.4226 |
| H | -1.8269  | 1.9415  | -3.5745 | H | -11.4172 | -5.4092 | 2.4286  | C | 4.2784   | -5.8264 | -1.9976 |
| H | -0.3389  | 1.2684  | -5.4348 | H | -8.7192  | -4.1829 | -0.9574 | C | 3.0460   | -5.6494 | -1.1128 |
| H | -1.6531  | 1.5250  | -6.5981 | H | -6.7910  | 6.1569  | 1.8258  | C | 2.4816   | -4.2248 | -1.0547 |
| H | -0.9756  | 2.8909  | -5.6927 | H | -8.2258  | 5.1608  | 1.8854  | C | 1.2232   | -4.2121 | -0.1828 |
| H | -3.0370  | -0.3212 | -5.2331 | H | -8.1156  | 4.5475  | -0.2528 | C | 3.5210   | -3.2173 | -0.5464 |
| H | -3.2305  | -0.0921 | -3.4942 | H | -8.3709  | 5.6852  | -1.5738 | H | 3.7241   | -6.4620 | -3.9407 |
| H | -1.6374  | -0.4614 | -4.1531 | H | -9.5922  | 7.1302  | 2.6541  | H | 5.0506   | -5.1097 | -1.7188 |
| H | -2.8762  | 4.0999  | -5.8128 | H | -8.1887  | 6.9439  | 3.7196  | H | 3.3237   | -5.9616 | -0.0968 |
| C | -4.5264  | -2.9138 | 3.9026  | H | -8.1972  | 8.1874  | 2.4453  | H | 2.2592   | -6.3419 | -1.4420 |
| C | -3.1220  | -2.2843 | 3.9075  | H | -9.9451  | -5.8926 | 3.2821  | H | 2.2023   | -3.9402 | -2.0780 |
| O | -2.9507  | -1.0685 | 3.8271  | H | -8.9959  | -2.6224 | -0.1640 | H | 1.4585   | -4.5334 | 0.8385  |
| C | -5.5306  | -2.0802 | 3.0804  | H | -10.2066 | -3.2692 | -1.2908 | H | 0.7775   | -3.2212 | -0.1015 |
| C | -5.2792  | -2.1771 | 1.5836  | H | -11.1461 | -4.4500 | 0.4525  | H | 0.4526   | -4.8806 | -0.5785 |
| N | -6.1435  | -2.9199 | 0.8719  |   |          |         |         | H | 4.3851   | -3.1539 | -1.2122 |
| O | -4.3039  | -1.6129 | 1.0489  |   |          |         |         | H | 3.8618   | -3.4851 | 0.4604  |
| N | -2.0727  | -3.1340 | 4.0952  |   |          |         |         | H | 3.0942   | -2.2133 | -0.4850 |
| C | -0.7213  | -2.6130 | 4.2693  |   |          |         |         | C | 9.2782   | -5.5605 | -1.0628 |
| C | -0.0569  | -2.2725 | 2.9260  |   |          |         |         | C | 8.1134   | -4.5599 | -0.9587 |
| O | -0.4211  | -2.7918 | 1.8729  |   |          |         |         | C | 8.5092   | -3.1069 | -1.1411 |
| C | 0.0224   | -3.8013 | 4.9134  |   |          |         |         | C | 7.8913   | -2.3140 | -2.1168 |
| C | -0.6380  | -5.0107 | 4.2355  |   |          |         |         | C | 9.4903   | -2.5185 | -0.3284 |
| C | -2.1155  | -4.6022 | 4.1159  |   |          |         |         | C | 8.2472   | -0.9703 | -2.2744 |
| N | 0.9932   | -1.4215 | 3.0414  |   |          |         |         | C | 9.8520   | -1.1823 | -0.4909 |
| C | 1.9340   | -1.1822 | 1.9718  |   |          |         |         | C | 9.2305   | -0.3963 | -1.4666 |
| C | 3.3698   | -1.3696 | 2.4530  |   |          |         |         | H | 10.0393  | -5.3711 | -0.3003 |
| O | 3.6478   | -2.0196 | 3.4654  |   |          |         |         | H | 7.6294   | -4.6811 | 0.0205  |
| N | 4.3146   | -0.7695 | 1.6899  |   |          |         |         | H | 7.3544   | -4.8073 | -1.7081 |
| C | 5.7438   | -0.9026 | 1.9591  |   |          |         |         | H | 7.1267   | -2.7464 | -2.7561 |
| C | 6.2280   | 0.1129  | 3.0261  |   |          |         |         | H | 9.9768   | -3.1132 | 0.4402  |
| O | 6.9921   | 1.0448  | 2.7509  |   |          |         |         | H | 7.7607   | -0.3764 | -3.0437 |
| C | 6.5320   | -0.8024 | 0.6639  |   |          |         |         | H | 10.6185  | -0.7435 | 0.1388  |
| O | 6.1268   | 0.3727  | -0.0413 |   |          |         |         | H | 9.5252   | 0.6406  | -1.5940 |

**Crystallographic water  
Model C**

**AP**

|   |         |        |         |
|---|---------|--------|---------|
| C | 11.4992 | 5.0827 | -2.1138 |
| C | 10.3586 | 4.0471 | -2.2260 |
| C | 10.0056 | 3.3124 | -0.9564 |
| C | 8.7614  | 3.1269 | -0.3840 |
| N | 10.9605 | 2.6449 | -0.2080 |
| C | 10.3037 | 2.0831 | 0.7911  |
| N | 8.9664  | 2.3378 | 0.7354  |
| H | 11.2279 | 5.8935 | -1.4305 |
| H | 10.6449 | 3.3065 | -2.9857 |
| H | 9.4529  | 4.5354 | -2.6053 |
| H | 7.7823  | 3.4923 | -0.6475 |

C -2.5090 0.8338 0.3037  
 C -1.2950 1.0253 -0.3296  
 C -1.1891 2.1795 -1.1515  
 N -0.0251 2.5629 -1.7066  
 N -2.2840 2.9297 -1.4125  
 C -3.4301 2.6234 -0.7965  
 N -3.5742 1.6320 0.1005  
 S 1.8464 -1.2364 -3.2048  
 C 1.5309 -0.3016 -1.8293  
 C -4.6380 3.4383 -1.1402  
 N 0.3560 -0.5954 -1.2852  
 C -0.3568 -1.6151 -1.9335  
 C -1.6609 -2.1000 -1.4038  
 C 0.3224 -2.0711 -3.0295  
 C -0.0785 -3.1284 -4.0059  
 C -0.1358 0.1178 -0.0663  
 H 2.2574 0.3924 -1.3872  
 H 0.0439 3.4368 -2.2355  
 H -0.4018 -0.6505 0.6632  
 H 0.7181 0.6760 0.3210  
 H -5.2006 2.9353 -1.9342  
 H -5.2870 3.5252 -0.2702  
 H -4.3489 4.4270 -1.4975  
 H -2.6514 0.0161 1.0063  
 H -1.6164 -2.2520 -0.3218  
 H -1.9134 -3.0538 -1.8659  
 H -2.4707 -1.4018 -1.6274  
 H -0.8611 -3.7587 -3.5819  
 H 0.7700 -3.7697 -4.2634  
 C 2.3831 -2.0297 7.2426  
 C 1.6412 -0.6904 7.2453  
 C 2.3087 0.3021 6.2904  
 O 2.3434 -0.0838 5.0491  
 O 2.7759 1.3672 6.7073  
 C -7.9334 3.1954 3.9097  
 C -7.0569 2.0066 3.5304  
 C -6.2616 2.2395 2.2634  
 O -6.3310 3.2728 1.6078  
 O -5.4849 1.2135 1.9535  
 H -8.4755 2.9897 4.8374  
 H -7.3321 4.0943 4.0577  
 H -7.6507 1.0954 3.3857  
 H -6.3361 1.7639 4.3201  
 C -0.3692 2.5224 4.9566  
 C -0.3026 1.8797 3.5628  
 C 0.9599 2.2240 2.8416  
 C 1.2159 2.8947 1.6629  
 N 2.2009 1.9088 3.3563  
 C 3.1316 2.3754 2.4994  
 N 2.5828 2.9825 1.4497  
 H 0.4943 2.2451 5.5663  
 H -0.3942 0.7923 3.6630  
 H -1.1530 2.2021 2.9524  
 H 0.5075 3.3373 0.9773  
 H 4.1892 2.2346 2.6577  
 H 0.8438 2.2017 -1.3495  
 C 5.7566 7.3164 1.5598  
 C 5.6908 6.3223 2.7206  
 C 6.3716 4.9678 2.4547  
 C 6.2830 4.0826 3.7043  
 C 5.7696 4.2636 1.2299  
 H 5.2156 6.9480 0.6825  
 H 4.6395 6.1341 2.9790  
 H 6.1474 6.7754 3.6102  
 H 7.4363 5.1553 2.2483  
 H 5.2376 3.8804 3.9652  
 H 6.7850 3.1222 3.5555  
 H 6.7423 4.5758 4.5683  
 H 4.6773 4.2412 1.2846  
 H 6.1162 3.2267 1.1583  
 H 6.0407 4.7743 0.3000  
 H -0.4634 -2.6829 -4.9295  
 H -8.6627 3.4079 3.1270  
 H 12.4032 4.6061 -1.7261  
 H 11.7213 5.5152 -3.0939  
 H -10.3493 2.3926 -4.8049  
 H -9.1029 1.1976 -5.2080

H -0.3805 3.6139 4.8778  
 H -1.2779 2.2043 5.4766  
 H 6.7940 7.5004 1.2559  
 H 5.3160 8.2793 1.8381  
 H 0.6052 -0.8407 6.9120  
 H 1.6121 -0.2539 8.2467  
 H 2.4763 -2.4113 6.2221  
 H 1.8726 -2.7809 7.8552  
 H 3.3964 -1.9089 7.6409  
 H 8.9198 -6.5861 -0.9292  
 H 9.7642 -5.4903 -2.0408  
 H 4.6943 -6.8289 -1.8348  
 H 0.4504 -7.7128 -4.9152  
 H -1.3141 -7.8425 -4.9049  
 H 3.9432 -5.5978 -5.9401  
 H 2.3731 1.2285 4.1548  
 H -4.8531 1.4261 1.1789  
 C 2.1241 6.5259 -4.0059  
 C 0.9090 5.9250 -3.3480  
 O 0.7861 4.7028 -3.2303  
 N -0.0368 6.7982 -2.9136  
 C -1.3721 6.2993 -2.6401  
 C -2.0179 5.7983 -3.9433  
 O -1.8151 6.3865 -5.0030  
 N -2.8070 4.7131 -3.7860  
 C -3.4133 4.0359 -4.9223  
 C -3.0285 2.5521 -4.9545  
 C -1.5169 2.2768 -4.9502  
 C -1.2515 0.7742 -4.8032  
 C -0.8086 2.8629 -6.1757  
 H 2.9996 5.9245 -3.7588  
 H 1.9806 6.4898 -5.0910  
 H -1.3260 5.5119 -1.8852  
 H -1.9715 7.1191 -2.2360  
 H -3.4808 2.0548 -4.0887  
 H -3.4877 2.0972 -5.8436  
 H -1.0921 2.7666 -4.0704  
 H 0.2633 2.6421 -6.1433  
 H -1.2121 2.4421 -7.1054  
 H -0.9170 3.9502 -6.2162  
 H -1.6442 0.2151 -5.6621  
 H -1.7271 0.3752 -3.8999  
 H -0.1773 0.5720 -4.7360  
 H -3.0858 4.5630 -5.8200  
 C -4.6834 -2.7960 3.8241  
 C -3.2850 -2.1520 3.9114  
 O -3.1531 -0.9346 4.0099  
 C -5.6625 -1.9306 3.0178  
 C -5.3892 -1.9644 1.5284  
 N -6.3532 -2.4882 0.7434  
 O -4.3305 -1.5256 1.0452  
 N -2.2186 -2.9984 3.9715  
 C -0.8690 -2.5017 4.2308  
 C -0.1529 -2.0632 2.9418  
 O -0.6119 -2.3406 1.8222  
 C -0.1619 -3.7466 4.8038  
 C -0.7731 -4.8768 3.9623  
 C -2.2444 -4.4566 3.7977  
 N 1.0272 -1.4553 3.1475  
 C 1.9295 -1.1445 2.0663  
 C 3.3787 -1.4545 2.4270  
 O 3.7021 -2.3615 3.1915  
 N 4.2670 -0.6359 1.8079  
 C 5.7012 -0.7671 2.0060  
 C 6.2452 0.1310 3.1489  
 O 7.2673 0.8140 2.9975  
 C 6.4775 -0.6034 0.7124  
 O 6.2445 0.6894 0.1206  
 N 5.5509 0.0299 4.2998  
 C 5.9530 0.6223 5.5736  
 H -6.6889 -2.2505 3.2150  
 H -5.5349 -0.8888 3.3234  
 H -4.6464 -3.8108 3.4207  
 H -0.4220 -3.8592 5.8611  
 H 0.9238 -3.6813 4.7179  
 H -0.6747 -5.8621 4.4236  
 H -0.2895 -4.9067 2.9821

H -2.8798 -4.9267 4.5584  
 H -2.6333 -4.7283 2.8103  
 H -0.9072 -1.6644 4.9311  
 H 1.8613 -0.0908 1.7931  
 H 1.6499 -1.7483 1.2015  
 H 7.5404 -0.7159 0.9276  
 H 6.1758 -1.3914 0.0146  
 H 6.9742 0.8415 -0.4977  
 H 5.8623 -1.8004 2.3388  
 H 6.7561 1.3335 5.3833  
 H 2.2963 7.5643 -3.7124  
 H -4.5063 4.1229 -4.8681  
 H -2.6803 4.1704 -2.9297  
 H 0.0142 7.7331 -3.2921  
 H 6.3168 -0.1545 6.2557  
 H 5.0942 1.1270 6.0246  
 H 4.7186 -0.5504 4.3191  
 H 1.3483 -1.1228 4.0786  
 H -7.2127 -2.8961 1.1164  
 H -6.2025 -2.4792 -0.2575  
 H 3.9293 0.0781 1.1636  
 H -5.0506 -2.8804 4.8537  
 C -10.5336 -4.8627 2.6728  
 C -9.6757 -4.2335 1.5982  
 O -8.5279 -3.8495 1.8515  
 C -10.8773 -3.7867 3.7082  
 N -10.2534 -4.0459 0.3926  
 C -9.5761 -3.3385 -0.6791  
 C -8.5508 7.3282 2.6347  
 C -8.4158 5.9927 1.9116  
 C -8.3793 6.1100 0.3896  
 N -7.9816 4.9594 -0.2434  
 O -8.7237 7.1162 -0.2163  
 H -9.9604 -3.3505 4.1108  
 H -11.4537 -4.2090 4.5356  
 H -11.4688 -2.9831 3.2584  
 H -11.4417 -5.3100 2.2542  
 H -8.6696 -3.8698 -0.9873  
 H -7.5240 5.4511 2.2371  
 H -9.2663 5.3440 2.1587  
 H -7.4748 4.2506 0.2737  
 H -7.8232 5.0252 -1.2381  
 H -9.4276 7.8736 2.2777  
 H -8.6445 7.1745 3.7138  
 H -7.6783 7.9625 2.4533  
 H -9.9507 -5.6623 3.1388  
 H -9.2906 -2.3303 -0.3630  
 H -10.2465 -3.2626 -1.5353  
 H -11.1944 -4.3754 0.2467  
 O 3.5546 1.2559 -0.4252  
 H 3.3263 2.0699 0.0953  
 H 4.5270 1.1910 -0.4634

### APH<sup>+</sup>

C 11.4811 5.1447 -2.0499  
 C 10.3519 4.0984 -2.1775  
 C 10.0115 3.3378 -0.9201  
 C 8.7717 3.1334 -0.3442  
 N 10.9747 2.6596 -0.1929  
 C 10.3278 2.0733 0.7983  
 N 8.9886 2.3212 0.7564  
 H 11.2024 5.9403 -1.3519  
 H 10.6453 3.3741 -2.9498  
 H 9.4396 4.5825 -2.5462  
 H 7.7905 3.5030 -0.5943  
 H 10.7723 1.4622 1.5711  
 H 8.2970 1.9410 1.4008  
 C -9.5797 1.7299 -4.3741  
 C -8.5736 2.5669 -3.5651  
 C -7.4723 1.7104 -2.9852  
 C -6.4371 1.2327 -3.8021  
 C -7.4815 1.3081 -1.6449  
 C -5.4660 0.3679 -3.3092  
 C -6.5131 0.4447 -1.1299  
 C -5.5035 -0.0401 -1.9697  
 O -4.5387 -0.9061 -1.5627

|   |          |         |         |   |          |         |         |   |         |         |         |
|---|----------|---------|---------|---|----------|---------|---------|---|---------|---------|---------|
| H | -10.0459 | 0.9698  | -3.7390 | C | -0.3705  | -1.5311 | -1.8506 | H | 4.7307  | -6.8026 | -1.9285 |
| H | -9.0958  | 3.0939  | -2.7585 | C | -1.6814  | -2.0526 | -1.3814 | H | 0.4830  | -7.6895 | -5.0169 |
| H | -8.1438  | 3.3380  | -4.2166 | C | 0.3610   | -1.9570 | -2.9257 | H | -1.2838 | -7.7824 | -5.0196 |
| H | -6.3959  | 1.5382  | -4.8449 | C | 0.0166   | -3.0049 | -3.9340 | H | 3.9804  | -5.5205 | -6.0260 |
| H | -8.2482  | 1.6942  | -0.9782 | C | -0.2520  | 0.1708  | 0.0528  | H | 2.4153  | 1.1441  | 4.1494  |
| H | -4.6702  | -0.0061 | -3.9446 | H | 2.2012   | 0.5094  | -1.1854 | H | -4.5990 | 1.5425  | 0.8677  |
| H | -6.5171  | 0.1927  | -0.0765 | H | -0.0689  | 3.5215  | -2.0882 | C | 2.1001  | 6.5675  | -3.9281 |
| H | -4.5277  | -1.0773 | -0.5846 | H | -0.5209  | -0.6191 | 0.7576  | C | 0.8851  | 5.9809  | -3.2509 |
| C | -0.4311  | -7.1573 | -4.7376 | H | 0.5759   | 0.7417  | 0.4779  | O | 0.7658  | 4.7633  | -3.0790 |
| C | -0.4341  | -6.8514 | -3.2361 | H | -5.3340  | 3.0158  | -1.7890 | N | -0.0718 | 6.8655  | -2.8629 |
| C | -1.6823  | -6.1698 | -2.7010 | H | -5.4037  | 3.5954  | -0.1166 | C | -1.4128 | 6.3719  | -2.6102 |
| C | -1.8870  | -6.0836 | -1.3163 | H | -4.4726  | 4.5076  | -1.3578 | C | -2.0182 | 5.8257  | -3.9155 |
| C | -2.6547  | -5.5969 | -3.5314 | H | -2.8011  | 0.0578  | 1.1121  | O | -1.7456 | 6.3509  | -4.9919 |
| C | -3.0103  | -5.4623 | -0.7777 | H | -1.6764  | -2.2218 | -0.3015 | N | -2.8620 | 4.7830  | -3.7449 |
| C | -3.7879  | -4.9733 | -3.0096 | H | -1.8910  | -3.0057 | -1.8654 | C | -3.4249 | 4.0631  | -4.8794 |
| C | -3.9756  | -4.9112 | -1.6277 | H | -2.4966  | -1.3709 | -1.6317 | C | -2.9674 | 2.5992  | -4.8916 |
| O | -5.1203  | -4.3296 | -1.1667 | H | -0.7598  | -3.6657 | -3.5461 | C | -1.4449 | 2.3954  | -4.8775 |
| H | -0.4749  | -6.2419 | -5.3367 | H | 0.8889   | -3.6169 | -4.1817 | C | -1.1121 | 0.9144  | -4.6658 |
| H | -0.2819  | -7.7840 | -2.6788 | C | 2.3947   | -2.1312 | 7.2092  | C | -0.7642 | 2.9583  | -6.1296 |
| H | 0.4395   | -6.2261 | -3.0015 | C | 1.6661   | -0.7864 | 7.1782  | H | 2.9777  | 5.9724  | -3.6732 |
| H | -1.1536  | -6.5161 | -0.6415 | C | 2.3468   | 0.1870  | 6.2155  | H | 1.9470  | 6.5085  | -5.0109 |
| H | -2.5404  | -5.6407 | -4.6093 | O | 2.4293   | -0.2284 | 4.9839  | H | -1.3873 | 5.6107  | -1.8279 |
| H | -3.1391  | -5.4059 | 0.3003  | O | 2.7708   | 1.2775  | 6.6132  | H | -2.0271 | 7.2011  | -2.2497 |
| H | -4.5368  | -4.5344 | -3.6596 | C | -7.9451  | 3.0872  | 3.9387  | H | -3.4019 | 2.0945  | -4.0208 |
| H | -5.0954  | -4.2568 | -0.2018 | C | -7.0765  | 1.9160  | 3.4775  | H | -3.4014 | 2.1094  | -5.7745 |
| C | 4.7574   | -4.8222 | -5.6916 | C | -6.3050  | 2.1761  | 2.1828  | H | -1.0428 | 2.9459  | -4.0221 |
| C | 4.6619   | -4.6000 | -4.1936 | O | -6.4401  | 3.2671  | 1.5919  | H | 0.3153  | 2.7780  | -6.0950 |
| O | 5.1158   | -3.5990 | -3.6429 | O | -5.5364  | 1.2178  | 1.7996  | H | -1.1553 | 2.4863  | -7.0397 |
| C | 4.6960   | -3.5131 | -6.4778 | H | -8.4447  | 2.8494  | 4.8836  | H | -0.9132 | 4.0384  | -6.2098 |
| H | 5.7195   | -5.3209 | -5.8696 | H | -7.3423  | 3.9853  | 4.0879  | H | -1.4832 | 0.3015  | -5.4970 |
| H | 5.4389   | -2.8126 | -6.0916 | H | -7.6805  | 1.0124  | 3.3237  | H | -1.5675 | 0.5331  | -3.7447 |
| H | 3.7124   | -3.0425 | -6.3793 | H | -6.3369  | 1.6456  | 4.2402  | H | -0.0300 | 0.7625  | -4.5963 |
| H | 4.8864   | -3.6837 | -7.5404 | C | -0.3782  | 2.4368  | 4.9806  | H | -3.1137 | 4.5970  | -5.7784 |
| N | 4.0805   | -5.6206 | -3.5028 | C | -0.2754  | 1.8051  | 3.5840  | C | -4.6664 | -2.8870 | 3.7774  |
| C | 4.3124   | -5.7992 | -2.0782 | C | 0.9901   | 2.1843  | 2.8845  | C | -3.2493 | -2.2799 | 3.8569  |
| C | 3.0819   | -5.6328 | -1.1900 | C | 1.2468   | 2.9114  | 1.7388  | O | -3.0823 | -1.0665 | 3.9558  |
| C | 2.5169   | -4.2086 | -1.1190 | N | 2.2321   | 1.8587  | 3.3900  | C | -5.6212 | -1.9771 | 2.9856  |
| C | 1.2452   | -4.2105 | -0.2673 | C | 3.1633   | 2.3725  | 2.5598  | C | -5.3663 | -1.9985 | 1.4936  |
| C | 3.5505   | -3.2118 | -0.5796 | N | 2.6132   | 3.0200  | 1.5358  | N | -6.3507 | -2.4902 | 0.7143  |
| H | 3.7905   | -6.4300 | -4.0316 | H | 0.4803   | 2.1685  | 5.6021  | O | -4.3018 | -1.5841 | 0.9967  |
| H | 5.0847   | -5.0850 | -1.7927 | H | -0.3435  | 0.7150  | 3.6732  | N | -2.1993 | -3.1481 | 3.9042  |
| H | 3.3591   | -5.9544 | -0.1769 | H | -1.1240  | 2.1156  | 2.9649  | C | -0.8421 | -2.6690 | 4.1565  |
| H | 2.2966   | -6.3229 | -1.5274 | H | 0.5375   | 3.3928  | 1.0804  | C | -0.1562 | -2.1597 | 2.8787  |
| H | 2.2558   | -3.9097 | -2.1432 | H | 4.2215   | 2.2299  | 2.7150  | O | -0.6260 | -2.3947 | 1.7547  |
| H | 1.4691   | -4.5257 | 0.7585  | H | 0.7171   | 2.2355  | -1.2610 | C | -0.1223 | -3.9418 | 4.6481  |
| H | 0.7821   | -3.2267 | -0.1976 | C | 5.7263   | 7.3033  | 1.6493  | C | -0.7722 | -5.0327 | 3.7842  |
| H | 0.4917   | -4.8914 | -0.6745 | C | 5.7308   | 6.2978  | 2.8027  | C | -2.2462 | -4.6014 | 3.6990  |
| H | 4.4217   | -3.1388 | -1.2349 | C | 6.4135   | 4.9529  | 2.4940  | N | 1.0162  | -1.5363 | 3.0879  |
| H | 3.8760   | -3.4957 | 0.4269  | C | 6.3601   | 4.0455  | 3.7305  | C | 1.9043  | -1.1824 | 2.0068  |
| H | 3.1267   | -2.2067 | -0.5103 | C | 5.7821   | 4.2689  | 1.2725  | C | 3.3538  | -1.5315 | 2.3318  |
| C | 9.3104   | -5.5217 | -1.1375 | H | 5.1462   | 6.9353  | 0.7972  | O | 3.6706  | -2.5216 | 2.9837  |
| C | 8.1297   | -4.5408 | -1.0177 | H | 4.6952   | 6.0942  | 3.1086  | N | 4.2440  | -0.6447 | 1.8111  |
| C | 8.5000   | -3.0793 | -1.1883 | H | 6.2232   | 6.7488  | 3.6741  | C | 5.6770  | -0.7836 | 1.9973  |
| C | 7.8471   | -2.2812 | -2.1367 | H | 7.4715   | 5.1498  | 2.2642  | C | 6.2312  | 0.0945  | 3.1502  |
| C | 9.4917   | -2.4883 | -0.3905 | H | 5.3220   | 3.8465  | 4.0220  | O | 7.2972  | 0.7117  | 3.0240  |
| C | 8.1816   | -0.9309 | -2.2844 | H | 6.8515   | 3.0840  | 3.5532  | C | 6.4525  | -0.6041 | 0.7049  |
| C | 9.8310   | -1.1450 | -0.5422 | H | 6.8492   | 4.5224  | 4.5873  | O | 6.2358  | 0.7058  | 0.1490  |
| C | 9.1769   | -0.3549 | -1.4930 | H | 4.6910   | 4.2569  | 1.3487  | N | 5.5061  | 0.0407  | 4.2860  |
| H | 10.0711  | -5.3287 | -0.3755 | H | 6.1184   | 3.2305  | 1.1796  | C | 5.9527  | 0.5591  | 5.5764  |
| H | 7.6525   | -4.6793 | -0.0376 | H | 6.0390   | 4.7894  | 0.3437  | H | -6.6563 | -2.2644 | 3.1856  |
| H | 7.3711   | -4.7947 | -1.7656 | H | -0.3560  | -2.5499 | -4.8580 | H | -5.4638 | -0.9388 | 3.2923  |
| H | 7.0711   | -2.7126 | -2.7629 | H | -8.7100  | 3.3203  | 3.1968  | H | -4.6598 | -3.8986 | 3.3637  |
| H | 10.0052  | -3.0865 | 0.3572  | H | 12.3914  | 4.6715  | -1.6729 | H | -0.3422 | -4.0979 | 5.7089  |
| H | 7.6690   | -0.3338 | -3.0342 | H | 11.6958  | 5.5965  | -3.0229 | H | 0.9601  | -3.8773 | 4.5235  |
| H | 10.6067  | -0.7043 | 0.0745  | H | -10.3715 | 2.3574  | -4.7956 | H | -0.6589 | -6.0377 | 4.1973  |
| H | 9.4545   | 0.6876  | -1.6127 | H | -9.0791  | 1.2116  | -5.1981 | H | -0.3294 | -5.0205 | 2.7841  |
| C | -2.6236  | 0.8737  | 0.4162  | H | -0.4055  | 3.5284  | 4.9077  | H | -2.8495 | -5.0848 | 4.4778  |
| C | -1.4195  | 1.0708  | -0.2194 | H | -1.2906  | 2.1024  | 5.4835  | H | -2.6836 | -4.8477 | 2.7257  |
| C | -1.3125  | 2.2456  | -1.0263 | H | 6.7445   | 7.5042  | 1.2952  | H | -0.8600 | -1.8698 | 4.9013  |
| N | -0.1524  | 2.6497  | -1.5535 | H | 5.2879   | 8.2576  | 1.9591  | H | 1.8415  | -0.1160 | 1.7808  |
| N | -2.4086  | 3.0005  | -1.2882 | H | 0.6318   | -0.9328 | 6.8371  | H | 1.6095  | -1.7490 | 1.1221  |
| C | -3.5544  | 2.7111  | -0.6848 | H | 1.6283   | -0.3300 | 8.1703  | H | 7.5143  | -0.7390 | 0.9156  |
| N | -3.6712  | 1.7022  | 0.2072  | H | 2.4845   | -2.5405 | 6.1991  | H | 6.1365  | -1.3698 | -0.0111 |
| S | 1.8721   | -1.0906 | -3.0265 | H | 1.8749   | -2.8603 | 7.8400  | H | 6.9546  | 0.8569  | -0.4824 |
| C | 1.4844   | -0.1805 | -1.6543 | H | 3.4089   | -2.0120 | 7.6054  | H | 5.8311  | -1.8212 | 2.3192  |
| C | -4.7642  | 3.5200  | -1.0006 | H | 8.9698   | -6.5545 | -1.0141 | H | 6.7918  | 1.2338  | 5.4077  |
| N | 0.2929   | -0.5033 | -1.1626 | H | 9.7919   | -5.4326 | -2.1161 | H | 2.2702  | 7.6120  | -3.6567 |

H -4.5203 4.0988 -4.8310  
H -2.7947 4.2765 -2.8636  
H -0.0162 7.7858 -3.2756  
H 6.2789 -0.2629 6.2240  
H 5.1251 1.0889 6.0543  
H 4.6062 -0.4305 4.2894  
H 1.3629 -1.2561 4.0236  
H -7.2125 -2.8928 1.0895  
H -6.2203 -2.4563 -0.2888  
H 3.9054 0.1244 1.2383  
H -5.0284 -2.9685 4.8088  
C -10.4842 -4.9642 2.6021  
C -9.6409 -4.3021 1.5361  
O -8.5098 -3.8777 1.7993  
C -10.8555 -3.9056 3.6455  
N -10.2140 -4.1338 0.3257  
C -9.5544 -3.3946 -0.7349  
C -8.5816 7.2332 2.7167  
C -8.5127 5.8940 1.9920  
C -8.4948 6.0066 0.4696  
N -8.0962 4.8548 -0.1558  
O -8.8509 7.0092 -0.1388  
H -9.9501 -3.4505 4.0529  
H -11.4234 -4.3481 4.4683  
H -11.4651 -3.1129 3.2009  
H -11.3801 -5.4297 2.1774  
H -8.6212 -3.8853 -1.0303  
H -7.6407 5.3140 2.3018  
H -9.3861 5.2821 2.2529  
H -7.5789 4.1526 0.3705  
H -7.9630 4.9105 -1.1546  
H -9.4306 7.8223 2.3615  
H -8.6810 7.0826 3.7958  
H -7.6785 7.8243 2.5367  
H -9.8829 -5.7539 3.0621  
H -9.3187 -2.3751 -0.4141  
H -10.2148 -3.3480 -1.6010  
H -11.1458 -4.4860 0.1747  
O 3.5731 1.3596 -0.4056  
H 3.3688 2.1478 0.1585  
H 4.5447 1.2435 -0.4118

## IP

C 11.5691 5.1455 -2.1551  
C 10.4503 4.0929 -2.3140  
C 10.0162 3.3930 -1.0499  
C 8.7345 3.1729 -0.5819  
N 10.9254 2.7880 -0.1987  
C 10.2064 2.2285 0.7570  
N 8.8703 2.4278 0.5770  
H 11.2413 5.9751 -1.5209  
H 10.7988 3.3321 -3.0261  
H 9.5685 4.5553 -2.7733  
H 7.7678 3.4772 -0.9509  
H 10.5939 1.6741 1.6000  
H 8.1309 2.0341 1.1546  
C -9.5079 1.7869 -4.4140  
C -8.3774 2.4853 -3.6389  
C -7.3636 1.5094 -3.0845  
C -6.5255 0.7857 -3.9448  
C -7.2406 1.2758 -1.7106  
C -5.6106 -0.1414 -3.4573  
C -6.3294 0.3485 -1.2011  
C -5.5096 -0.3664 -2.0793  
O -4.6095 -1.3064 -1.6657  
H -10.0453 1.0877 -3.7651  
H -8.8043 3.0720 -2.8176  
H -7.8790 3.2014 -4.3055  
H -6.5835 0.9571 -5.0169  
H -7.8468 1.8453 -1.0111  
H -4.9583 -0.6926 -4.1259  
H -6.2363 0.2296 -0.1275  
H -4.4687 -1.3071 -0.6866  
C -0.4089 -7.1579 -4.5255  
C -0.4120 -6.8115 -3.0327  
C -1.7053 -6.2190 -2.4985

C -1.9424 -6.1905 -1.1172  
C -2.6901 -5.6696 -3.3314  
C -3.1073 -5.6443 -0.5842  
C -3.8626 -5.1205 -2.8154  
C -4.0808 -5.1124 -1.4366  
O -5.2675 -4.6149 -0.9849  
H -0.5177 -6.2650 -5.1492  
H -0.1773 -7.7127 -2.4528  
H 0.4117 -6.1112 -2.8313  
H -1.2048 -6.6130 -0.4404  
H -2.5523 -5.6717 -4.4075  
H -3.2671 -5.6413 0.4911  
H -4.6162 -4.6910 -3.4657  
H -5.2354 -4.4815 -0.0264  
C 4.7936 -4.8784 -5.5353  
C 4.8173 -4.6620 -4.0389  
O 5.4327 -3.7343 -3.5152  
C 4.7569 -3.5591 -6.3085  
H 5.7088 -5.4307 -5.7869  
H 5.5738 -2.9134 -5.9806  
H 3.8181 -3.0257 -6.1286  
H 4.8500 -3.7316 -7.3837  
N 4.1377 -5.5971 -3.3230  
C 4.3390 -5.7550 -1.8975  
C 3.0772 -5.6071 -1.0556  
C 2.4334 -4.2161 -1.0825  
C 1.1916 -4.2302 -0.1918  
C 3.4191 -3.1166 -0.6655  
H 3.7078 -6.3567 -3.8293  
H -5.0799 -5.0102 -1.6078  
H 3.3423 -5.8551 -0.0186  
H 2.3361 -6.3557 -1.3672  
H 2.1207 -4.0102 -2.1146  
H 1.4534 -4.5128 0.8347  
H 0.7049 -3.2596 -0.1357  
H 0.4482 -4.9450 -0.5554  
H 4.2528 -3.0282 -1.3674  
H 3.8242 -3.3152 0.3344  
H 2.9247 -2.1422 -0.6337  
C 9.3374 -5.4801 -0.9579  
C 8.1997 -4.4504 -0.8661  
C 8.6299 -3.0148 -1.0968  
C 8.0091 -2.2386 -2.0833  
C 9.6334 -2.4231 -0.3138  
C 8.3818 -0.9039 -2.2793  
C 10.0044 -1.0933 -0.5058  
C 9.3792 -0.3219 -1.4918  
H 10.1164 -5.2879 -0.2141  
H 7.7298 -4.5297 0.1246  
H 7.4224 -4.6996 -1.5953  
H 7.2300 -2.6814 -2.6960  
H 10.1241 -3.0078 0.4597  
H 7.8983 -0.3228 -3.0602  
H 10.7827 -0.6477 0.1047  
H 9.6778 0.7102 -1.6423  
C -2.6735 0.8380 0.3272  
C -1.4746 0.9581 -0.3005  
C -1.2274 2.1222 -1.1424  
N -0.0237 2.3593 -1.5653  
N -2.3299 2.9425 -1.4211  
C -3.4724 2.7420 -0.8058  
N -3.6641 1.7466 0.1024  
S 1.6618 -0.9861 -3.2514  
C 1.2562 -0.1234 -1.8480  
C -4.6510 3.6106 -1.1116  
N 0.1881 -0.6198 -1.2478  
C -0.4036 -1.7138 -1.8981  
C -1.6493 -2.3328 -1.3674  
C 0.2876 -2.0524 -3.0253  
C -0.0129 -3.1241 -4.0222  
C -0.3532 0.0225 -0.0142  
H 1.8235 0.7047 -1.4600  
H 0.0265 3.2113 -2.1287  
H -0.6381 -0.7762 0.6688  
H 0.4869 0.5722 0.4078  
H -5.2775 3.1090 -1.8579  
H -5.2639 3.7456 -0.2161

H -4.3210 4.5668 -1.5166  
H -2.9148 0.0424 1.0244  
H -1.6084 -2.4681 -0.2849  
H -1.8052 -3.3094 -1.8230  
H -2.5145 -1.7114 -1.6088  
H -0.7622 -3.8077 -3.6214  
H 0.8823 -3.7049 -4.2673  
C 2.4312 -1.8269 7.2851  
C 1.7631 -0.4468 7.3912  
C 2.3208 0.5700 6.4127  
O 2.1148 0.2072 5.1374  
O 2.8807 1.6005 6.7320  
C -7.8753 3.3591 3.8612  
C -7.1058 2.1109 3.4351  
C -6.3510 2.2574 2.1077  
O -6.4754 3.3211 1.4544  
O -5.6249 1.2634 1.7689  
H -8.3767 3.2009 4.8228  
H -7.2048 4.2150 3.9626  
H -7.7773 1.2476 3.3363  
H -6.3681 1.8210 4.1930  
C -0.3134 2.6948 4.9303  
C -0.3788 1.8456 3.6577  
C 0.7651 2.1724 2.7569  
C 0.7569 2.8426 1.5603  
N 2.0804 1.8823 3.1048  
C 2.8439 2.3536 2.1321  
N 2.0811 2.9476 1.1785  
H 0.6395 2.5672 5.4494  
H -0.3695 0.7813 3.9097  
H -1.3181 2.0219 3.1255  
H -0.0389 3.2245 0.9460  
H 3.9176 2.2918 2.0807  
H 2.3816 3.3170 0.2881  
C 5.8222 7.4354 1.4768  
C 5.5677 6.3780 2.5516  
C 6.1247 4.9770 2.2453  
C 5.8979 4.0490 3.4446  
C 5.5160 4.3832 0.9646  
H 5.3117 7.1968 0.5381  
H 4.4872 6.2912 2.7349  
H 6.0065 6.7188 3.4979  
H 7.2089 5.0666 2.0845  
H 4.8271 3.9169 3.6416  
H 6.3433 3.0646 3.2793  
H 6.3429 4.4700 4.3524  
H 4.4215 4.4201 1.0201  
H 5.8226 3.3377 0.8332  
H 5.8207 4.9370 0.0719  
H -0.4076 -2.6975 -4.9508  
H -8.6312 3.6196 3.1195  
H 12.4478 4.6936 -1.6881  
H 11.8563 5.5479 -3.1309  
H -10.2278 2.5127 -4.8060  
H -9.1099 1.2153 -5.2584  
H -0.4158 3.7573 4.6890  
H -1.1203 2.4251 5.6188  
H 6.8924 7.5256 1.2581  
H 5.4649 8.4177 1.8010  
H 0.6896 -0.5408 7.1858  
H 1.8797 -0.0312 8.3939  
H 2.3833 -2.2130 6.2632  
H 1.9430 -2.5410 7.9539  
H 3.4871 -1.7696 7.5674  
H 8.9583 -6.4927 -0.7886  
H 9.8083 -5.4511 -1.9453  
H 4.7836 -6.7425 -1.7131  
H 0.5330 -7.6398 -4.8051  
H -1.2251 -7.8420 -4.7766  
H 3.9533 -5.5229 -5.8193  
H 2.2993 0.9553 4.4621  
H -4.5597 1.6450 0.6911  
C 2.1984 6.5694 -4.0834  
C 1.0987 5.9086 -3.2826  
O 1.1144 4.7077 -3.0238  
N 0.0878 6.7466 -2.8898  
C -1.2103 6.1597 -2.6021

C -1.8752 5.7293 -3.9202  
O -1.6559 6.3578 -4.9567  
N -2.6921 4.6638 -3.8119  
C -3.3395 4.0712 -4.9740  
C -3.3136 2.5422 -4.8790  
C -1.9111 1.9257 -4.7502  
C -2.0174 0.4240 -4.4637  
C -1.0385 2.2013 -5.9791  
H 3.1051 5.9675 -4.0212  
H 1.8805 6.6167 -5.1309  
H -1.0936 5.3209 -1.9157  
H -1.8384 6.9117 -2.1147  
H -3.9185 2.2291 -4.0201  
H -3.8152 2.1318 -5.7660  
H -1.4141 2.3815 -3.8886  
H -0.0527 1.7372 -5.8649  
H -1.4976 1.7961 -6.8899  
H -0.8801 3.2735 -6.1276  
H -2.5302 -0.1011 -5.2800  
H -2.5767 0.2332 -3.5421  
H -1.0236 -0.0207 -4.3546  
H -2.8217 4.4375 -5.8639  
C -4.6301 -2.6356 3.8657  
C -3.1895 -2.1089 3.9055  
O -2.9397 -0.9073 3.9514  
C -5.5474 -1.7930 2.9650  
C -5.2787 -2.0010 1.4905  
N -6.2777 -2.5221 0.7515  
O -4.1848 -1.7036 0.9745  
N -2.1933 -3.0393 4.0036  
C -0.8202 -2.6186 4.2384  
C -0.1172 -2.1839 2.9460  
O -0.5132 -2.5537 1.8383  
C -0.1557 -3.9124 4.7551  
C -0.8587 -4.9947 3.9215  
C -2.3094 -4.4914 3.8166  
N 1.0156 -1.4752 3.1429  
C 1.9723 -1.2142 2.0954  
C 3.4011 -1.3848 2.5995  
O 3.6776 -2.0651 3.5911  
N 4.3411 -0.7383 1.8649  
C 5.7625 -0.8968 2.1625  
C 6.2712 0.1387 3.1980  
O 7.1549 0.9601 2.9305  
C 6.6173 -0.9594 0.9088  
O 6.4767 0.2206 0.1045  
N 5.6780 0.0049 4.4043  
C 6.0061 0.7985 5.5850  
H -6.5915 -2.0276 3.1872  
H -5.3776 -0.7258 3.1421  
H -4.6750 -3.6897 3.5815  
H -0.3789 -4.0324 5.8202  
H 0.9292 -3.9000 4.6286  
H -0.7979 -5.9899 4.3681  
H -0.4150 -5.0353 2.9236  
H -2.9423 -4.9350 4.5951  
H -2.7466 -4.7255 2.8408  
H -0.7991 -1.8013 4.9640  
H 1.8641 -0.2076 1.6865  
H 1.7920 -1.9246 1.2873  
H 7.6622 -1.0714 1.2065  
H 6.3252 -1.8408 0.3267  
H 7.1978 0.1897 -0.5473  
H 5.8528 -1.8771 2.6446  
H 6.8172 1.4764 5.3198  
H 2.4032 7.5886 -3.7438  
H -4.3799 4.4152 -5.0440  
H -2.6112 4.0960 -2.9605  
H 0.0210 7.5952 -3.4382  
H 6.3370 0.1434 6.3973  
H 5.1383 1.3732 5.9188  
H 4.9718 -0.7217 4.4882  
H 1.2604 -1.1391 4.0705  
H -7.1636 -2.8348 1.1516  
H -6.1387 -2.5835 -0.2498  
H 4.0612 -0.1105 1.1128  
H -4.9988 -2.5721 4.8965

C -10.5456 -4.7108 2.7120  
C -9.6604 -4.1177 1.6392  
O -8.5025 -3.7699 1.8974  
C -10.8247 -3.6228 3.7532  
N -10.2236 -3.9212 0.4287  
C -9.5157 -3.2376 -0.6378  
C -8.4871 7.4740 2.5270  
C -8.3987 6.1247 1.8235  
C -8.3341 6.2198 0.3009  
N -7.9460 5.0553 -0.3000  
O -8.6437 7.2292 -0.3239  
H -9.8828 -3.2374 4.1495  
H -11.4182 -4.0155 4.5833  
H -11.3743 -2.7869 3.3094  
H -11.4784 -5.1052 2.2945  
H -8.6282 -3.8020 -0.9425  
H -7.5377 5.5453 2.1654  
H -9.2789 5.5157 2.0677  
H -7.4852 4.3287 0.2480  
H -7.7804 5.0968 -1.2946  
H -9.3294 8.0550 2.1435  
H -8.6104 7.3396 3.6060  
H -7.5824 8.0657 2.3571  
H -10.0053 -5.5443 3.1705  
H -9.1946 -2.2410 -0.3198  
H -10.1780 -3.1359 -1.4977  
H -11.1779 -4.2088 0.2820  
O 3.9757 0.8941 -0.6246  
H 4.1469 1.8430 -0.5938  
H 4.8842 0.5161 -0.6157

## YI

C 11.4691 5.0975 -2.2313  
C 10.3472 4.0424 -2.3468  
C 9.9326 3.3739 -1.0591  
C 8.6576 3.1442 -0.5772  
N 10.8581 2.8099 -0.1971  
C 10.1535 2.2652 0.7787  
N 8.8134 2.4345 0.6004  
H 11.1514 5.9431 -1.6131  
H 10.6839 3.2649 -3.0466  
H 9.4586 4.4947 -2.8034  
H 7.6829 3.4230 -0.9451  
H 10.5553 1.7402 1.6337  
H 8.0831 2.0515 1.1980  
C -9.5977 1.6295 -4.4187  
C -8.5616 2.4539 -3.6315  
C -7.4755 1.5910 -3.0285  
C -6.4740 1.0358 -3.8383  
C -7.4569 1.2718 -1.6660  
C -5.5128 0.1761 -3.3184  
C -6.4983 0.4121 -1.1251  
C -5.5248 -0.1546 -1.9572  
O -4.5908 -1.0442 -1.5294  
H -10.0856 0.8986 -3.7657  
H -9.0664 3.0166 -2.8377  
H -8.1144 3.1973 -4.3035  
H -6.4472 1.2809 -4.8973  
H -8.2013 1.7138 -1.0078  
H -4.7402 -0.2515 -3.9485  
H -6.4948 0.1997 -0.0630  
H -4.4970 -1.0854 -0.5442  
C -0.4597 -7.2758 -4.4828  
C -0.4611 -6.9182 -2.9927  
C -1.7320 -6.2696 -2.4706  
C -1.8980 -6.0773 -1.0919  
C -2.7650 -5.8331 -3.3100  
C -3.0425 -5.4831 -0.5671  
C -3.9191 -5.2383 -2.8016  
C -4.0664 -5.0667 -1.4247  
O -5.2330 -4.5184 -0.9734  
H -0.5543 -6.3844 -5.1110  
H -0.2636 -7.8236 -2.4049  
H 0.3842 -6.2456 -2.7884  
H -1.1173 -6.4036 -0.4101  
H -2.6808 -5.9603 -4.3838

H -3.1415 -5.3422 0.5064  
H -4.7131 -4.9021 -3.4591  
H -5.1726 -4.3387 -0.0242  
C 4.7306 -4.9812 -5.5212  
C 4.8750 -4.8252 -4.0264  
O 5.6737 -4.0376 -3.5221  
C 4.7370 -3.6267 -6.2351  
H 5.5837 -5.5829 -5.8602  
H 5.6269 -3.0623 -5.9495  
H 3.8611 -3.0332 -5.9539  
H 4.7307 -3.7542 -7.3207  
N 4.0766 -5.6437 -3.2926  
C 4.2876 -5.8323 -1.8758  
C 3.0558 -5.5697 -1.0131  
C 2.5294 -4.1299 -1.0468  
C 1.2896 -4.0257 -0.1583  
C 3.5994 -3.1107 -0.6339  
H 3.4895 -6.3018 -3.7825  
H 5.1011 -5.1641 -1.5960  
H 3.3156 -5.8330 0.0215  
H 2.2497 -6.2572 -1.3068  
H 2.2345 -3.9030 -2.0784  
H 1.5315 -4.2780 0.8812  
H 0.8703 -3.0217 -0.1564  
H 0.4961 -4.7017 -0.4912  
H 4.4504 -3.1127 -1.3209  
H 3.9688 -3.3211 0.3776  
H 3.1903 -2.0972 -0.6339  
C 9.2868 -5.5284 -0.9493  
C 8.1488 -4.4970 -0.8571  
C 8.5906 -3.0576 -1.0391  
C 8.0314 -2.2650 -2.0496  
C 9.5480 -2.4797 -0.1910  
C 8.4207 -0.9301 -2.2061  
C 9.9370 -1.1500 -0.3461  
C 9.3747 -0.3636 -1.3571  
H 10.0516 -5.3539 -0.1863  
H 7.6575 -4.6000 0.1209  
H 7.3896 -4.7219 -1.6121  
H 7.2903 -2.6983 -2.7135  
H 9.9899 -3.0766 0.6028  
H 7.9869 -0.3367 -3.0069  
H 10.6804 -0.7168 3.3152  
H 9.6900 0.6669 -1.4810  
C -2.5077 0.7888 0.2169  
C -1.3274 0.9115 -0.4877  
C -1.2000 2.0758 -1.2961  
N -0.0321 2.4267 -1.8579  
N -2.2623 2.8967 -1.4782  
C -3.3902 2.6419 -0.8092  
N -3.5412 1.6493 0.0847  
S 1.7980 -1.2327 -3.4098  
C 1.5033 -0.2569 -2.0230  
C -4.5763 3.5102 -1.0950  
N 0.3377 -0.6806 -1.4988  
C -0.3432 -1.7481 -2.1233  
C -1.6312 -2.2631 -1.5726  
C 0.3387 -2.1885 -3.2154  
C -0.0038 -3.2998 -4.1549  
C -0.1800 -0.0294 -0.2698  
H 0.7411 1.7695 -1.8930  
H 0.0470 3.2773 -2.4178  
H -0.4551 -0.8057 0.4452  
H 0.6737 0.5154 0.1321  
H -5.2544 2.9765 -1.7704  
H -5.1208 3.7124 -0.1732  
H -4.2729 4.4419 -1.5717  
H -2.6527 -0.0217 0.9256  
H -1.5588 -2.4667 -0.5004  
H -1.9050 -3.1937 -2.0686  
H -2.4474 -1.5536 -1.7290  
H -0.8801 -3.8470 -3.8030  
H 0.8256 -4.0110 -4.2424  
C 2.3824 -1.8435 7.2811  
C 1.7994 -0.4652 7.6086  
C 2.2996 0.5890 6.6441  
O 1.9664 0.2994 5.3808



O 2.9325 1.5768 6.9656  
C -7.9542 3.2712 3.8408  
C -7.0406 2.0989 3.4868  
C -6.1873 2.3524 2.2582  
O -6.1979 3.4204 1.6537  
O -5.4378 1.3156 1.9300  
H -8.5212 3.0503 4.7500  
H -7.3762 4.1815 4.0083  
H -7.6122 1.1794 3.3106  
H -6.3527 1.8618 4.3077  
C -0.3872 2.6482 4.8983  
C -0.3719 2.0542 3.4875  
C 0.9445 2.2499 2.8031  
C 1.2232 2.6315 1.5127  
N 2.1451 2.0035 3.4580  
C 3.1119 2.2174 2.5807  
N 2.6022 2.6173 1.3928  
H 0.3801 2.1998 5.5273  
H -0.6052 0.9837 3.5434  
H -1.1615 2.4999 2.8733  
H 0.5884 2.9198 0.6906  
H 4.1665 2.0885 2.7615  
H 3.1100 2.5168 0.5137  
C 5.7199 7.3895 1.3959  
C 5.6605 6.4380 2.5915  
C 6.2805 5.0499 2.3538  
C 6.1829 4.2049 3.6299  
C 5.6245 4.3312 1.1658  
H 5.1327 7.0157 0.5511  
H 4.6131 6.3012 2.8964  
H 6.1663 6.9026 3.4478  
H 7.3462 5.1862 2.1174  
H 5.1346 4.0407 3.9086  
H 6.6554 3.2283 3.4969  
H 6.6670 4.7092 4.4735  
H 4.5347 4.3481 1.2687  
H 5.9385 3.2833 1.1059  
H 5.8730 4.8097 0.2135  
H -0.2220 -2.9190 -5.1587  
H -8.6623 3.4687 3.0352  
H 12.3538 4.6563 -1.7656  
H 11.7423 5.4751 -3.2211  
H -10.3702 2.2733 -4.8514  
H -9.1173 1.0778 -5.2328  
H -0.2039 3.7267 4.8707  
H -1.3588 2.4779 5.3722  
H 6.7510 7.5228 1.0481  
H 5.3270 8.3772 1.6575  
H 0.7055 -0.4958 7.5340  
H 2.0633 -0.1490 8.6197  
H 2.1861 -2.1202 6.2430  
H 1.9609 -2.6122 7.9356  
H 3.4684 -1.8473 7.4184  
H 8.9018 -6.5437 -0.8110  
H 9.7764 -5.4780 -1.9267  
H 4.6395 -6.8584 -1.6994  
H 0.4752 -7.7748 -4.7557  
H -1.2841 -7.9509 -4.7321  
H 3.8261 -5.5486 -5.7703  
H 2.1797 1.0757 4.7265  
H -4.7755 1.5152 1.1652  
C 2.0880 6.4657 -4.1497  
C 0.8943 5.8341 -3.4806  
O 0.7853 4.6098 -3.3881  
N -0.0480 6.6929 -3.0041  
C -1.3762 6.1760 -2.7266  
C -2.0325 5.6935 -4.0316  
O -1.8446 6.2988 -5.0846  
N -2.8139 4.6036 -3.8787  
C -3.4407 3.9366 -5.0094  
C -3.1041 2.4424 -5.0206  
C -1.6031 2.1196 -5.0597  
C -1.3791 0.6180 -4.8539  
C -0.9290 2.6271 -6.3385  
H 2.9686 5.8475 -3.9718  
H 1.9027 6.4931 -5.2289  
H -1.3167 5.3748 -1.9877

H -1.9794 6.9828 -2.3016  
H -3.5440 1.9796 -4.1294  
H -3.6056 1.9812 -5.8831  
H -1.1289 2.6371 -4.2210  
H 0.1345 2.3666 -6.3431  
H -1.3881 2.1831 -7.2310  
H -0.9999 3.7154 -6.4226  
H -1.8407 0.0334 -5.6601  
H -1.8137 0.2793 -3.9069  
H -0.3121 0.3770 -4.8361  
H -3.0967 4.4430 -5.9133  
C -4.6826 -2.7090 3.8833  
C -3.2812 -2.0836 3.9727  
O -3.1279 -0.8694 4.0762  
C -5.6505 -1.8536 3.0527  
C -5.3612 -1.9271 1.5677  
N -6.3175 -2.4653 0.7825  
O -4.2913 -1.5119 1.0915  
N -2.2271 -2.9465 4.0357  
C -0.8762 -2.4563 4.2761  
C -0.1866 -2.0105 2.9777  
O -0.5955 -2.3755 1.8722  
C -0.1566 -3.7115 4.8130  
C -0.7901 -4.8314 3.9731  
C -2.2616 -4.4013 3.8348  
N 0.9432 -1.2964 3.1723  
C 1.8956 -1.0336 2.1197  
C 3.3266 -1.2522 2.5963  
O 3.5909 -1.9127 3.6085  
N 4.2616 -0.6630 1.8204  
C 5.6882 -0.8209 2.0838  
C 6.2086 0.1877 3.1440  
O 7.0991 1.0081 2.8954  
C 6.5079 -0.8198 0.8037  
O 6.3098 0.3771 0.0408  
N 5.6115 0.0332 4.3469  
C 5.9420 0.7846 5.5534  
H -6.6800 -2.1633 3.2492  
H -5.5202 -0.8052 3.3342  
H -4.6535 -3.7322 3.5015  
H -0.3893 -3.8373 5.8753  
H 0.9277 -3.6480 4.7004  
H -0.6901 -5.8198 4.4274  
H -0.3239 -4.8572 2.9849  
H -2.8914 -4.8821 4.5932  
H -2.6605 -4.6511 2.8463  
H -0.8993 -1.6279 4.9881  
H 1.8028 -0.0148 1.7405  
H 1.6873 -1.7144 1.2928  
H 7.5618 -0.9151 1.0746  
H 6.2268 -1.6952 0.2071  
H 7.0436 0.4078 -0.5929  
H 5.8095 -1.8161 2.5293  
H 6.7447 1.4813 5.3120  
H 2.2759 7.4854 -3.8043  
H -4.5304 4.0611 -4.9578  
H -2.6764 4.0564 -3.0261  
H -0.0161 7.6307 -3.3785  
H 6.2849 0.1026 6.3385  
H 5.0718 1.3369 5.9180  
H 4.9070 -0.6995 4.4128  
H 1.2030 -0.9909 4.1073  
H -7.1913 -2.8444 1.1533  
H -6.1553 -2.4714 -0.2173  
H 3.9683 -0.0774 1.0296  
H -5.0581 -2.7685 4.9119  
C -10.4757 -4.8171 2.7943  
C -9.6433 -4.1841 1.7018  
O -8.5184 -3.7327 1.9470  
C -10.8731 -3.7242 3.7918  
N -10.2220 -4.0695 0.4881  
C -9.5752 -3.3663 -0.6047  
C -8.5871 7.3732 2.4770  
C -8.4256 6.0151 1.8045  
C -8.3850 6.0764 0.2797  
N -7.9078 4.9314 -0.3045  
O -8.7939 7.0324 -0.3666

H -9.9789 -3.2331 4.1820  
H -11.4341 -4.1440 4.6310  
H -11.4981 -2.9642 3.3126  
H -11.3606 -5.3189 2.3882  
H -8.6547 -3.8753 -0.9095  
H -7.5292 5.4988 2.1562  
H -9.2703 5.3658 2.0691  
H -7.3558 4.2801 0.2413  
H -7.7565 4.9623 -1.3020  
H -9.4613 7.8960 2.0823  
H -8.7013 7.2574 3.5589  
H -7.7167 8.0096 2.2915  
H -9.8592 -5.5738 3.2882  
H -9.3194 -2.3435 -0.3120  
H -10.2542 -3.3301 -1.4568  
H -11.1432 -4.4536 0.3498  
O 3.6419 0.9508 -0.4954  
H 4.5530 0.7227 -0.7513  
H 2.9817 0.5691 -1.1362

### YIH<sup>+</sup>

C 11.4657 5.1255 -2.2010  
C 10.3491 4.0661 -2.3266  
C 9.9325 3.3885 -1.0443  
C 8.6566 3.1467 -0.5707  
N 10.8574 2.8269 -0.1802  
C 10.1517 2.2716 0.7888  
N 8.8114 2.4321 0.6041  
H 11.1419 5.9664 -1.5797  
H 10.6921 3.2938 -3.0292  
H 9.4603 4.5168 -2.7843  
H 7.6819 3.4199 -0.9427  
H 10.5529 1.7449 1.6431  
H 8.0808 2.0384 1.1942  
C -9.5968 1.6464 -4.4115  
C -8.5638 2.4705 -3.6202  
C -7.4676 1.6109 -3.0305  
C -6.4681 1.0665 -3.8507  
C -7.4342 1.2887 -1.6689  
C -5.4952 0.2136 -3.3408  
C -6.4635 0.4367 -1.1360  
C -5.4935 -0.1182 -1.9794  
O -4.5346 -0.9862 -1.5594  
H -10.0764 0.9055 -3.7638  
H -9.0699 3.0195 -2.8180  
H -8.1262 3.2252 -4.2861  
H -6.4534 1.3131 -4.9097  
H -8.1712 1.7270 -1.0004  
H -4.7261 -0.2086 -3.9790  
H -6.4380 0.2460 -0.0697  
H -4.4958 -1.1079 -0.5769  
C -0.4459 -7.2447 -4.5578  
C -0.4473 -6.9003 -3.0645  
C -1.7108 -6.2435 -2.5354  
C -1.8790 -6.0768 -1.1534  
C -2.7327 -5.7720 -3.3696  
C -3.0143 -5.4727 -0.6207  
C -3.8775 -5.1662 -2.8531  
C -4.0263 -5.0187 -1.4734  
O -5.1813 -4.4530 -1.0151  
H -0.5286 -6.3468 -5.1786  
H -0.2595 -7.8129 -2.4850  
H 0.4052 -6.2388 -2.8533  
H -1.1064 -6.4305 -0.4759  
H -2.6466 -5.8795 -4.4454  
H -3.1139 -5.3492 0.4549  
H -4.6624 -4.8013 -3.5063  
H -5.1212 -4.2961 -0.0621  
C 4.7407 -4.9334 -5.5777  
C 4.8927 -4.7955 -4.0817  
O 5.7068 -4.0279 -3.5715  
C 4.7860 -3.5742 -6.2806  
H 5.5750 -5.5572 -5.9236  
H 5.6914 -3.0376 -5.9905  
H 3.9270 -2.9583 -5.9951  
H 4.7762 -3.6928 -7.3671

|   |         |         |         |   |          |         |         |   |          |         |         |
|---|---------|---------|---------|---|----------|---------|---------|---|----------|---------|---------|
| N | 4.0831  | -5.6082 | -3.3531 | C | -0.3588  | 2.0199  | 3.4932  | C | -4.6723  | -2.7584 | 3.8499  |
| C | 4.3003  | -5.8174 | -1.9398 | C | 0.9597   | 2.2360  | 2.8202  | C | -3.2579  | -2.1572 | 3.9273  |
| C | 3.0721  | -5.5639 | -1.0699 | C | 1.2457   | 2.6643  | 1.5461  | O | -3.0794  | -0.9441 | 4.0040  |
| C | 2.5491  | -4.1225 | -1.0838 | N | 2.1569   | 1.9681  | 3.4722  | C | -5.6210  | -1.8787 | 3.0183  |
| C | 1.3063  | -4.0298 | -0.1986 | C | 3.1284   | 2.2157  | 2.6097  | C | -5.3525  | -1.9609 | 1.5306  |
| C | 3.6195  | -3.1122 | -0.6509 | N | 2.6253   | 2.6589  | 1.4346  | N | -6.3430  | -2.4487 | 0.7577  |
| H | 3.4870  | -6.2549 | -3.8477 | H | 0.3855   | 2.1467  | 5.5364  | O | -4.2704  | -1.5954 | 1.0348  |
| H | 5.1164  | -5.1550 | -1.6541 | H | -0.5841  | 0.9468  | 3.5341  | N | -2.2144  | -3.0326 | 4.0066  |
| H | 3.3340  | -5.8410 | -0.0395 | H | -1.1490  | 2.4699  | 2.8827  | C | -0.8607  | -2.5478 | 4.2453  |
| H | 2.2634  | -6.2452 | -1.3701 | H | 0.6142   | 2.9868  | 0.7343  | C | -0.1799  | -2.0720 | 2.9536  |
| H | 2.2595  | -3.8803 | -2.1136 | H | 4.1823   | 2.0810  | 2.7910  | O | -0.5837  | -2.4267 | 1.8427  |
| H | 1.5435  | -4.3014 | 0.8370  | H | 3.1402   | 2.5877  | 0.5577  | C | -0.1362  | -3.8123 | 4.7540  |
| H | 0.8899  | -3.0248 | -0.1800 | C | 5.7146   | 7.3769  | 1.4484  | C | -0.7885  | -4.9212 | 3.9145  |
| H | 0.5117  | -4.6969 | -0.5465 | C | 5.6880   | 6.4194  | 2.6404  | C | -2.2615  | -4.4878 | 3.8157  |
| H | 4.4767  | -3.1098 | -1.3301 | C | 6.3119   | 5.0367  | 2.3820  | N | 0.9376   | -1.3390 | 3.1549  |
| H | 3.9791  | -3.3357 | 0.3612  | C | 6.2311   | 4.1787  | 3.6504  | C | 1.8891   | -1.0547 | 2.1062  |
| H | 3.2147  | -2.0967 | -0.6418 | C | 5.6450   | 4.3284  | 1.1938  | C | 3.3220   | -1.2811 | 2.5759  |
| C | 9.2994  | -5.5145 | -1.0125 | H | 5.1102   | 7.0037  | 0.6156  | O | 3.5889   | -1.9614 | 3.5737  |
| C | 8.1576  | -4.4872 | -0.9200 | H | 4.6481   | 6.2735  | 2.9661  | N | 4.2555   | -0.6770 | 1.8092  |
| C | 8.5978  | -3.0446 | -1.0798 | H | 6.2082   | 6.8831  | 3.4883  | C | 5.6824   | -0.8420 | 2.0666  |
| C | 8.0448  | -2.2393 | -2.0838 | H | 7.3742   | 5.1794  | 2.1351  | C | 6.2078   | 0.1562  | 3.1334  |
| C | 9.5485  | -2.4765 | -0.2177 | H | 5.1863   | 4.0105  | 3.9400  | O | 7.1011   | 0.9750  | 2.8905  |
| C | 8.4347  | -0.9024 | -2.2208 | H | 6.7026   | 3.2038  | 3.5021  | C | 6.5010   | -0.8361 | 0.7856  |
| C | 9.9377  | -1.1447 | -0.3532 | H | 6.7244   | 4.6753  | 4.4932  | O | 6.3090   | 0.3661  | 0.0293  |
| C | 9.3827  | -0.3461 | -1.3585 | H | 4.5562   | 4.3518  | 1.3048  | N | 5.6104   | -0.0044 | 4.3356  |
| H | 10.0555 | -5.3478 | -0.2391 | H | 5.9526   | 3.2792  | 1.1250  | C | 5.9478   | 0.7357  | 5.5472  |
| H | 7.6565  | -4.6030 | 0.0515  | H | 5.8895   | 4.8115  | 0.2430  | H | -6.6575  | -2.1574 | 3.2232  |
| H | 7.4073  | -4.7048 | -1.6859 | H | -0.1721  | -2.8424 | -5.1010 | H | -5.4666  | -0.8282 | 3.2839  |
| H | 7.3093  | -2.6645 | -2.7591 | H | -8.6908  | 3.4375  | 3.0896  | H | -4.6640  | -3.7838 | 3.4725  |
| H | 9.9854  | -3.0830 | 0.5716  | H | 12.3506  | 4.6859  | -1.7340 | H | -0.3499  | -3.9492 | 5.8189  |
| H | 8.0069  | -0.2992 | -3.0177 | H | 11.7412  | 5.5095  | -3.1877 | H | 0.9463   | -3.7499 | 4.6237  |
| H | 10.6762 | -0.7197 | 0.3190  | H | -10.3759 | 2.2890  | -4.8339 | H | -0.6787  | -5.9156 | 4.3533  |
| H | 9.6989  | 0.6856  | -1.4684 | H | -9.1163  | 1.1065  | -5.2336 | H | -0.3451  | -4.9336 | 2.9154  |
| C | -2.5934 | 0.8020  | 0.2967  | H | -0.2111  | 3.6762  | 4.8968  | H | -2.8716  | -4.9624 | 4.5944  |
| C | -1.4206 | 0.9353  | -0.4050 | H | -1.3559  | 2.4111  | 5.3789  | H | -2.6901  | -4.7422 | 2.8411  |
| C | -1.2931 | 2.1125  | -1.2074 | H | 6.7367   | 7.5179  | 1.0777  | H | -0.8768  | -1.7341 | 4.9745  |
| N | -0.1316 | 2.4643  | -1.7650 | H | 5.3224   | 8.3611  | 1.7239  | H | 1.7970   | -0.0280 | 1.7477  |
| N | -2.3566 | 2.9373  | -1.3921 | H | 0.7174   | -0.5678 | 7.5311  | H | 1.6804   | -1.7193 | 1.2662  |
| C | -3.4860 | 2.6978  | -0.7384 | H | 2.0838   | -0.2296 | 8.6082  | H | 7.5545   | -0.2976 | 1.0558  |
| N | -3.6106 | 1.6869  | 0.1496  | H | 2.1830   | -2.1838 | 6.2157  | H | 6.2159   | -1.7067 | 0.1840  |
| S | 1.7772  | -1.1102 | -3.3158 | H | 1.9812   | -2.6862 | 7.9081  | H | 7.0433   | 0.3964  | -0.6040 |
| C | 1.4378  | -0.1555 | -1.9267 | H | 3.4804   | -1.9159 | 7.3757  | H | 5.8000   | -1.8409 | 2.5045  |
| C | -4.6754 | 3.5541  | -1.0050 | H | 8.9155   | -6.5323 | -0.8910 | H | 6.7428   | 1.4409  | 5.3051  |
| N | 0.2803  | -0.6207 | -1.4172 | H | 9.7994   | -5.4509 | -1.9838 | H | 2.2782   | 7.5212  | -3.7766 |
| C | -0.3598 | -1.7046 | -2.0576 | H | 4.6508   | -6.8465 | -1.7787 | H | -4.5347  | 4.0750  | -4.9382 |
| C | -1.6340 | -2.2663 | -1.5243 | H | 0.4839   | -7.7520 | -4.8325 | H | -2.7540  | 4.1344  | -2.9778 |
| C | 0.3472  | -2.1123 | -3.1466 | H | -1.2776  | -7.9077 | -4.8152 | H | -0.0384  | 7.6603  | -3.4129 |
| C | 0.0510  | -3.2257 | -4.0993 | H | 3.8195   | -5.4722 | -5.8294 | H | 6.3041   | 0.0482  | 6.3214  |
| C | -0.2668 | -0.0013 | -0.1869 | H | 2.1857   | 1.0182  | 4.7253  | H | 5.0771   | 1.2774  | 5.9259  |
| H | 0.6552  | 1.8179  | -1.7780 | H | -4.5183  | 1.5769  | 0.8304  | H | 4.9066   | -0.7376 | 4.3989  |
| H | -0.0356 | 3.3302  | -2.3020 | C | 2.0820   | 6.4970  | -4.1038 | H | 1.1964   | -1.0450 | 4.0940  |
| H | -0.5442 | -0.7944 | 0.5084  | C | 0.9026   | 5.8795  | -3.3918 | H | -7.2129  | -2.8249 | 1.1402  |
| H | 0.5679  | 0.5507  | 0.2442  | O | 0.8167   | 4.6616  | -3.2162 | H | -6.1976  | -2.4615 | -0.2440 |
| H | -5.3336 | 3.0315  | -1.7090 | N | -0.0599  | 6.7493  | -2.9759 | H | 3.9632   | -0.0663 | 1.0373  |
| H | -5.2417 | 3.7098  | -0.0816 | C | -1.3886  | 6.2302  | -2.7078 | H | -5.0448  | -2.8039 | 4.8800  |
| H | -4.3683 | 4.5013  | -1.4473 | C | -2.0141  | 5.7115  | -4.0142 | C | -10.4732 | -4.8656 | 2.7409  |
| H | -2.7723 | -0.0046 | 1.0016  | O | -1.7688  | 6.2678  | -5.0823 | C | -9.6383  | -4.2245 | 1.6552  |
| H | -1.5663 | -2.4748 | -0.4529 | N | -2.8370  | 4.6532  | -3.8518 | O | -8.5117  | -3.7804 | 1.9050  |
| H | -1.8693 | -3.2023 | -2.0291 | C | -3.4433  | 3.9677  | -4.9839 | C | -10.8613 | -3.7817 | 3.7517  |
| H | -2.4713 | -1.5844 | -1.6900 | C | -3.0829  | 2.4795  | -4.9901 | N | -10.2155 | -4.0969 | 0.4419  |
| H | -0.8087 | -3.8060 | -3.7600 | C | -1.5775  | 2.1792  | -5.0245 | C | -9.5656  | -3.3830 | -0.6420 |
| H | 0.9055  | -3.9063 | -4.1861 | C | -1.3345  | 0.6797  | -4.8258 | C | -8.5919  | 7.3302  | 2.5345  |
| C | 2.3927  | -1.9128 | 7.2527  | C | -0.9053  | 2.7012  | -6.2988 | C | -8.4790  | 5.9641  | 1.8699  |
| C | 1.8119  | -0.5379 | 7.5968  | H | 2.9662   | 5.8802  | -3.9417 | C | -8.4592  | 6.0084  | 0.3446  |
| C | 2.3046  | 0.5232  | 6.6369  | H | 1.8631   | 6.5120  | -5.1770 | N | -8.0164  | 4.8445  | -0.2264 |
| O | 1.9721  | 0.2373  | 5.3720  | H | -1.3361  | 5.4488  | -1.9476 | O | -8.8506  | 6.9682  | -0.3095 |
| O | 2.9328  | 1.5131  | 6.9609  | H | -2.0065  | 7.0413  | -2.3128 | H | -9.9632  | -3.3007 | 4.1453  |
| C | -7.9526 | 3.2172  | 3.8617  | H | -3.5210  | 2.0103  | -4.1011 | H | -11.4234 | -4.2075 | 4.5873  |
| C | -7.0632 | 2.0432  | 3.4455  | H | -3.5741  | 2.0097  | -5.8537 | H | -11.4822 | -3.0120 | 3.2828  |
| C | -6.2282 | 2.2935  | 2.1860  | H | -1.1141  | 2.7013  | -4.1818 | H | -11.3620 | -5.3568 | 2.3300  |
| O | -6.2849 | 3.4096  | 1.6258  | H | 0.1605   | 2.4503  | -6.3027 | H | -8.6348  | -3.8799 | -0.9345 |
| O | -5.4978 | 1.3082  | 1.8021  | H | -1.3580  | 2.2574  | -7.1945 | H | -7.5926  | 5.4233  | 2.2087  |
| H | -8.4864 | 2.9861  | 4.7897  | H | -0.9869  | 3.7891  | -6.3766 | H | -9.3364  | 5.3403  | 2.1541  |
| H | -7.3590 | 4.1190  | 4.0217  | H | -1.7865  | 0.0950  | -5.6371 | H | -7.4683  | 4.1922  | 0.3308  |
| H | -7.6575 | 1.1370  | 3.2724  | H | -1.7680  | 0.3274  | -3.8832 | H | -7.8796  | 4.8595  | -1.2263 |
| H | -6.3578 | 1.7799  | 4.2436  | H | -0.2648  | 0.4525  | -4.8073 | H | -9.4568  | 7.8766  | 2.1504  |
| C | -0.3844 | 2.5959  | 4.9109  | H | -3.1002  | 4.4774  | -5.8856 | H | -8.6923  | 7.2245  | 3.6190  |

H -7.7066 7.9409 2.3322  
H -9.8610 -5.6322 3.2247  
H -9.3278 -2.3564 -0.3468  
H -10.2341 -3.3565 -1.5028  
H -11.1420 -4.4671 0.3019  
O 3.6578 1.0075 -0.4575  
H 4.5557 0.7523 -0.7341  
H 2.9708 0.6444 -1.0756

## TC

C 11.4885 4.9675 -2.4192  
C 10.4480 3.8356 -2.5445  
C 10.0338 3.1938 -1.2453  
C 8.7609 2.9422 -0.7705  
N 10.9649 2.6968 -0.3494  
C 10.2646 2.1707 0.6399  
N 8.9232 2.2903 0.4382  
H 11.0876 5.8068 -1.8421  
H 10.8645 3.0579 -3.1993  
H 9.5500 4.2096 -3.0505  
H 7.7832 3.1712 -1.1641  
H 10.6724 1.6959 1.5211  
H 8.1910 1.9133 1.0365  
C -9.6046 1.4625 -4.2684  
C -8.1490 1.9430 -4.1269  
C -7.2485 0.9602 -3.4085  
C -6.8114 -0.2126 -4.0415  
C -6.8337 1.1809 -2.0910  
C -5.9868 -1.1254 -3.3920  
C -6.0048 0.2764 -1.4235  
C -5.5672 -0.8763 -2.0801  
O -4.7370 -1.7965 -1.4962  
H -10.0527 1.2929 -3.2841  
H -8.1363 2.8983 -3.5897  
H -7.7432 2.1467 -5.1261  
H -7.1123 -0.4093 -5.0678  
H -7.1574 2.0679 -1.5571  
H -5.6340 -2.0220 -3.8906  
H -5.6955 0.4736 -0.4040  
H -4.4432 -1.5017 -0.5985  
C -0.4581 -7.4334 -4.4098  
C -0.4376 -7.0657 -2.9222  
C -1.7340 -6.5329 -2.3372  
C -1.7104 -5.5544 -1.3344  
C -2.9860 -7.0307 -2.7218  
C -2.8776 -5.0911 -0.7245  
C -4.1603 -6.5853 -2.1233  
C -4.1136 -5.6186 -1.1136  
O -5.3000 -5.2500 -0.5483  
H -0.7626 -6.5797 -5.0235  
H -0.1233 -7.9502 -2.3487  
H 0.3447 -6.3153 -2.7529  
H -0.7593 -5.1440 -1.0076  
H -3.0527 -7.7870 -3.4980  
H -2.8214 -4.3141 0.0353  
H -5.1259 -6.9804 -2.4209  
H -5.1522 -4.6008 0.1575  
C 4.7134 -5.1400 -5.5408  
C 5.0141 -5.1088 -4.0666  
O 5.8796 -4.3744 -3.5885  
C 4.3938 -3.7329 -6.0626  
H 5.6066 -5.5214 -6.0495  
H 5.2085 -3.0514 -5.8088  
H 3.4749 -3.3461 -5.6090  
H 4.2611 -3.7369 -7.1476  
N 4.2544 -5.9469 -3.3230  
C 4.3261 -5.9674 -1.8837  
C 3.1384 -5.2865 -1.2114  
C 3.0048 -3.7880 -1.5051  
C 1.6628 -3.2984 -0.9711  
C 4.1713 -2.9781 -0.9298  
H 3.5136 -6.4582 -3.7777  
H 5.2616 -5.4794 -1.6104  
H 3.2233 -5.4319 -0.1259  
H 2.2152 -5.7994 -1.5147  
H 3.0080 -3.6497 -2.5954

H 1.5214 -3.5649 0.0812  
H 1.5696 -2.2166 -1.0641  
H 0.8363 -3.7435 -1.5315  
H 5.1185 -3.2453 -1.4045  
H 4.2593 -3.1385 0.1513  
H 4.0113 -1.9066 -1.0891  
C 9.3379 -5.6519 -1.0340  
C 8.1990 -4.6215 -0.9469  
C 8.6430 -3.1834 -1.1313  
C 8.1085 -2.4000 -2.1624  
C 9.5873 -2.5998 -0.2718  
C 8.5142 -1.0711 -2.3319  
C 9.9918 -1.2766 -0.4387  
C 9.4590 -0.5013 -1.4744  
H 10.1016 -5.4773 -0.2696  
H 7.7042 -4.7211 0.0297  
H 7.4460 -4.8483 -1.7065  
H 7.3813 -2.8397 -2.8380  
H 10.0099 -3.1901 0.5373  
H 8.1032 -0.4863 -3.1509  
H 10.7281 -0.8406 0.2289  
H 9.7905 0.5225 -1.6111  
C -3.0508 1.3326 0.6719  
C -1.8435 1.2576 0.0241  
C -1.5629 2.2779 -0.9208  
N -0.3791 2.3059 -1.5808  
N -2.4725 3.2366 -1.1858  
C -3.6301 3.2208 -0.5081  
N -3.9516 2.3125 0.4208  
S 1.5374 0.8218 -2.8848  
C 0.6485 1.2806 -1.3453  
C -4.6162 4.3111 -0.8089  
N 0.0655 0.0433 -0.8799  
C -0.2507 -0.8314 -1.9500  
C -1.2575 -1.9094 -1.7148  
C 0.4848 -0.6273 -3.0597  
C 0.6362 -1.4723 -4.2803  
C -0.8086 0.2024 0.2792  
H 1.3817 1.6479 -0.6280  
H -0.1250 3.1272 -2.1364  
H -1.2574 -0.7539 0.5404  
H -0.1882 0.4919 1.1316  
H -4.7180 4.4411 -1.8893  
H -5.5877 4.0832 -0.3740  
H -4.2535 5.2633 -0.4058  
H -3.3335 0.5851 1.4086  
H -1.0451 -2.4421 -0.7842  
H -1.2570 -2.6332 -2.5292  
H -2.2709 -1.5019 -1.6477  
H -0.0450 -2.3254 -4.2448  
H 1.6589 -1.8671 -4.3587  
C 2.5529 -1.9196 7.2739  
C 1.9167 -0.5481 7.5282  
C 2.4256 0.4805 6.5415  
O 2.0747 0.1825 5.2832  
O 3.0868 1.4568 6.8415  
C -7.8397 3.1609 3.9545  
C -8.2272 2.3433 2.7119  
C -7.1710 2.4604 1.6346  
O -7.3647 3.0286 0.5619  
O -6.0173 1.9254 1.9828  
H -8.6066 3.0683 4.7286  
H -6.8902 2.8062 4.3618  
H -9.1767 2.6826 2.2924  
H -8.3261 1.2865 2.9845  
C -0.2572 2.5531 4.9030  
C -0.2237 2.0830 3.4479  
C 1.0967 2.3175 2.7835  
C 1.3777 2.8544 1.5512  
N 2.2911 1.9273 3.3783  
C 3.2573 2.2120 2.5236  
N 2.7553 2.7912 1.4051  
H 0.5079 2.0568 5.4979  
H -0.4600 1.0112 3.4143  
H -1.0044 2.5822 2.8644  
H 0.7406 3.2963 0.8013  
H 4.3082 2.0255 2.6679

H 3.2602 2.7986 0.5246  
C 5.7915 7.2775 1.2782  
C 5.4773 6.4124 2.5003  
C 6.2558 5.0876 2.5684  
C 5.9066 4.3246 3.8520  
C 6.0167 4.2190 1.3243  
H 5.4987 6.7827 0.3467  
H 4.4018 6.1847 2.5203  
H 5.6826 6.9868 3.4128  
H 7.3291 5.3263 2.6019  
H 4.8339 4.1036 3.9001  
H 6.4495 3.3766 3.8988  
H 6.1566 4.9118 4.7422  
H 4.9468 4.1523 1.1019  
H 6.3920 3.2040 1.4802  
H 6.5111 4.6338 0.4420  
H 4.4286 -0.9168 -5.2012  
H -7.7334 4.2209 3.7111  
H 12.3798 4.6024 -1.9024  
H 11.7802 5.3351 -3.4074  
H -10.2134 2.2006 -4.8003  
H -9.6526 0.5192 -4.8223  
H -0.0837 3.6318 4.9728  
H -1.2317 2.3328 5.3483  
H 6.8638 7.4942 1.2140  
H 5.2604 8.2337 1.3231  
H 0.8281 -0.6168 7.4186  
H 2.1399 -0.1869 8.5339  
H 2.3784 -2.2469 6.2458  
H 2.1461 -2.6723 7.9555  
H 3.6360 -1.8789 7.4286  
H 8.9521 -6.6667 -0.8959  
H 9.8290 -5.6032 -2.0106  
H 4.3939 -7.0094 -1.5466  
H 0.5348 -7.7560 -4.7405  
H -1.1500 -8.2548 -4.6174  
H 3.8951 -5.8322 -5.7682  
H 2.3153 0.9458 4.6305  
H -5.2747 2.1469 1.2961  
C 2.0782 6.3128 -4.2063  
C 0.9413 5.7662 -3.3589  
O 0.9603 4.6303 -2.8763  
N -0.0978 6.6324 -3.1856  
C -1.4033 6.1306 -2.7888  
C -2.1178 5.5887 -4.0347  
O -2.0669 6.2176 -5.0920  
N -2.7520 4.4127 -3.8693  
C -3.4597 3.7722 -4.9664  
C -3.6654 2.2792 -4.7257  
C -2.3808 1.4463 -4.5661  
C -2.7458 -0.0395 -4.5180  
C -1.3521 1.7334 -5.6645  
H 3.0139 5.8402 -3.9056  
H 1.8848 6.0568 -5.2535  
H -1.2835 5.3756 -2.0133  
H -1.9897 6.9581 -2.3781  
H -4.3057 2.1247 -3.8473  
H -4.2357 1.8902 -5.5796  
H -1.9126 1.7059 -3.6095  
H -0.4686 1.1028 -5.5340  
H -1.7685 1.5339 -6.6599  
H -1.0106 2.7720 -5.6399  
H -3.2263 -0.3516 -5.4535  
H -3.4452 -0.2492 -3.7060  
H -1.8601 -0.6573 -4.3682  
H -2.8933 3.9529 -5.8836  
C -4.5610 -2.8153 3.9879  
C -3.1495 -2.1985 3.9720  
O -2.9921 -0.9838 4.0856  
C -5.5398 -1.9808 3.1359  
C -5.2436 -2.0599 1.6470  
N -6.0845 -2.8098 0.8980  
O -4.2612 -1.4842 1.1448  
N -2.0890 -3.0521 3.8980  
C -0.7275 -2.5605 4.0935  
C -0.0490 -2.1453 2.7793  
O -0.3780 -2.6297 1.6951

C 0.0043 -3.8040 4.6431  
 C -0.6630 -4.9474 3.8633  
 C -2.1374 -4.5173 3.7665  
 N 0.9874 -1.2863 2.9476  
 C 1.9573 -1.0202 1.9096  
 C 3.3829 -1.2429 2.4131  
 O 3.6325 -1.9207 3.4155  
 N 4.3431 -0.6453 1.6685  
 C 5.7611 -0.8151 1.9725  
 C 6.2605 0.1894 3.0464  
 O 7.0812 1.0799 2.7961  
 C 6.6364 -0.8416 0.7308  
 O 6.5324 0.3637 -0.0445  
 N 5.7284 -0.0396 4.2674  
 C 6.0833 0.7007 5.4758  
 H -6.5626 -2.3154 3.3258  
 H -5.4398 -0.9302 3.4217  
 H -4.5666 -3.8569 3.6604  
 H -0.1912 -3.8928 5.7167  
 H 1.0850 -3.7475 4.4923  
 H -0.5502 -5.9208 4.3460  
 H -0.2354 -5.0058 2.8600  
 H -2.7329 -4.9564 4.5759  
 H -2.5803 -4.8132 2.8106  
 H -0.7390 -1.7186 4.7892  
 H 1.8694 0.0004 1.5264  
 H 1.7499 -1.6872 1.0724  
 H 7.6734 -0.9735 1.0488  
 H 6.3547 -1.7013 0.1162  
 H 7.2524 0.3107 -0.6944  
 H 5.8539 -1.8118 2.4196  
 H 6.9249 1.3513 5.2391  
 H 2.1675 7.3987 -4.1255  
 H -4.4353 4.2565 -5.1099  
 H -2.6723 3.9449 -2.9642  
 H -0.1474 7.3907 -3.8545  
 H 6.3780 -0.0001 6.2622  
 H 5.2400 1.2990 5.8315  
 H 5.0343 -0.7818 4.3316  
 H 1.2334 -0.9810 3.8860  
 H -6.9622 -3.1711 1.2799  
 H -5.9688 -2.7540 -0.1104  
 H 4.0751 -0.0267 0.9004  
 H -4.9006 -2.7982 5.0293  
 C -10.3179 -4.9341 3.0159  
 C -9.5161 -4.2983 1.9008  
 O -8.3958 -3.8234 2.1213  
 C -10.7509 -3.8377 3.9957  
 N -10.1238 -4.2055 0.6991  
 C -9.5192 -3.5078 -0.4221  
 C -8.4977 7.2531 2.5730  
 C -8.0717 6.1403 1.6213  
 C -8.1124 6.5727 0.1550  
 N -8.1474 5.5364 -0.7292  
 O -8.1035 7.7483 -0.1896  
 H -9.8740 -3.3044 4.3700  
 H -11.2888 -4.2633 4.8470  
 H -11.4084 -3.1123 3.5065  
 H -11.1869 -5.4766 2.6277  
 H -8.6705 -4.0671 -0.8312  
 H -7.0424 5.8227 1.8358  
 H -8.6918 5.2472 1.7470  
 H -8.0388 4.5796 -0.4141  
 H -8.0671 5.7581 -1.7096  
 H -9.5475 7.5188 2.4190  
 H -8.3707 6.9465 3.6159  
 H -7.9056 8.1527 2.3930  
 H -9.6701 -5.6568 3.5201  
 H -9.1600 -2.5256 -0.1042  
 H -10.2656 -3.3759 -1.2059  
 H -11.0276 -4.6346 0.5797  
 O 3.9972 1.1646 -0.6035  
 H 3.5737 0.8047 -1.4030  
 H 4.9523 0.9332 -0.6486

TCH<sup>+</sup>

C 11.5128 4.9718 -2.3944  
 C 10.4155 3.8896 -2.4819  
 C 10.0312 3.2388 -1.1768  
 C 8.7685 3.0112 -0.6636  
 N 10.9781 2.6968 -0.3245  
 C 10.2983 2.1672 0.6767  
 N 8.9537 2.3263 0.5248  
 H 11.1804 5.8202 -1.7878  
 H 10.7639 3.1062 -3.1691  
 H 9.5122 4.3124 -2.9377  
 H 7.7852 3.2792 -1.0159  
 H 10.7225 1.6607 1.5321  
 H 8.2362 1.9503 1.1421  
 C -9.5877 1.5266 -4.2708  
 C -8.1465 2.0278 -4.0690  
 C -7.2481 1.0318 -3.3661  
 C -6.7704 -0.1039 -4.0356  
 C -6.8814 1.2014 -2.0266  
 C -5.9479 -1.0288 -3.4001  
 C -6.0545 0.2842 -1.3728  
 C -5.5716 -0.8285 -2.0670  
 O -4.7394 -1.7594 -1.5006  
 H -10.0590 1.3092 -3.3070  
 H -8.1667 2.9596 -3.4925  
 H -7.7174 2.2793 -5.0474  
 H -7.0377 -0.2622 -0.5778  
 H -7.2424 2.0510 -1.4564  
 H -5.5650 -1.8979 -3.9245  
 H -5.7991 0.4384 -0.3297  
 H -4.4546 -1.4853 -0.5923  
 C -0.4624 -7.3902 -4.4535  
 C -0.4417 -7.0302 -2.9641  
 C -1.7409 -6.5048 -2.3767  
 C -1.7183 -5.5730 -1.3301  
 C -2.9947 -6.9588 -2.8063  
 C -2.8876 -5.1138 -0.7217  
 C -4.1717 -6.5172 -2.2094  
 C -4.1263 -5.5980 -1.1564  
 O -5.3155 -5.2334 -0.5953  
 H -0.7796 -6.5374 -5.0619  
 H -0.1227 -7.9154 -2.3945  
 H 0.3376 -6.2768 -2.7923  
 H -0.7661 -5.1973 -0.9677  
 H -3.0619 -7.6761 -3.6184  
 H -2.8306 -4.3713 0.0719  
 H -5.1388 -6.8785 -2.5427  
 H -5.1715 -4.6075 0.1320  
 C 4.7150 -5.1035 -5.5706  
 C 4.9965 -5.0592 -4.0928  
 O 5.8433 -4.3083 -3.6071  
 C 4.4366 -3.6988 -6.1198  
 H 5.6061 -5.5146 -6.0600  
 H 5.2605 -3.0311 -5.8594  
 H 3.5174 -3.2854 -5.6908  
 H 4.3255 -3.7167 -7.2070  
 N 4.2466 -5.9113 -3.3556  
 C 4.3241 -5.9486 -1.9178  
 C 3.1271 -5.2975 -1.2313  
 C 2.9620 -3.7984 -1.5070  
 C 1.6176 -3.3411 -0.9512  
 C 4.1190 -2.9722 -0.9345  
 H 3.5238 -6.4426 -3.8163  
 H 5.2512 -5.4460 -1.6413  
 H 3.2214 -5.4535 -0.1481  
 H 2.2120 -5.8243 -1.5350  
 H 2.9503 -3.6479 -2.5956  
 H 1.4989 -3.6159 0.1017  
 H 1.4987 -2.2610 -1.0345  
 H 0.7919 -3.8031 -1.4982  
 H 5.0647 -3.2115 -1.4269  
 H 4.2266 -3.1487 0.1425  
 H 3.9334 -1.9018 -1.0734  
 C 9.3363 -5.6494 -1.0643  
 C 8.1975 -4.6185 -0.9724  
 C 8.6416 -3.1776 -1.1372  
 C 8.1059 -2.3796 -2.1568  
 C 9.5842 -2.6047 -0.2690

C 8.5056 -1.0465 -2.3039  
 C 9.9855 -1.2779 -0.4162  
 C 9.4488 -0.4872 -1.4381  
 H 10.0955 -5.4831 -0.2937  
 H 7.6979 -4.7296 0.0005  
 H 7.4478 -4.8363 -1.7382  
 H 7.3807 -2.8109 -2.8398  
 H 10.0084 -3.2058 0.5314  
 H 8.0925 -0.4503 -3.1135  
 H 10.7204 -0.8508 0.2587  
 H 9.7788 0.5391 -1.5598  
 C -3.0776 1.2962 0.7532  
 C -1.8881 1.2205 0.0841  
 C -1.6092 2.2551 -0.8547  
 N -0.4331 2.2845 -1.5137  
 N -2.5160 3.2289 -1.1040  
 C -3.6569 3.2369 -0.4161  
 N -3.9501 2.3067 0.5108  
 S 1.4714 0.8055 -2.8519  
 C 0.5938 1.2378 -1.3032  
 C -4.6452 4.3322 -0.6562  
 N 0.0001 0.0032 -0.8568  
 C -0.3067 -0.8688 -1.9328  
 C -1.3092 -1.9523 -1.7064  
 C 0.4307 -0.6505 -3.0382  
 C 0.5918 -1.4819 -4.2672  
 C -0.8619 0.1484 0.3107  
 H 1.3264 1.5965 -0.5809  
 H -0.1907 3.0878 -2.1002  
 H -1.3205 -0.8064 0.5600  
 H -0.2306 0.4174 1.1616  
 H -4.5771 4.6765 -1.6892  
 H -5.6569 3.9946 -0.4179  
 H -4.4085 5.1831 -0.0061  
 H -3.3853 0.5537 1.4835  
 H -1.1078 -2.4783 -0.7697  
 H -1.2889 -2.6822 -2.5151  
 H -2.3275 -1.5541 -1.6605  
 H -0.0653 -2.3535 -4.2296  
 H 1.6240 -1.8475 -4.3579  
 C 2.5565 -1.9433 7.2595  
 C 1.8989 -0.5795 7.4992  
 C 2.4013 0.4521 6.5131  
 O 2.0738 0.1406 5.2513  
 O 3.0383 1.4440 6.8139  
 C -7.8226 3.1788 3.9614  
 C -8.1822 2.4068 2.6829  
 C -7.0737 2.4861 1.6349  
 O -7.2934 3.0521 0.5390  
 O -5.9512 1.9649 1.9707  
 H -8.6125 3.0828 4.7127  
 H -6.8914 2.7903 4.3819  
 H -9.1073 2.7857 2.2405  
 H -8.3337 1.3494 2.9314  
 C -0.2419 2.5481 4.9102  
 C -0.2255 2.0200 3.4743  
 C 1.0749 2.2804 2.7823  
 C 1.3263 2.8640 1.5641  
 N 2.2847 1.8940 3.3445  
 C 3.2330 2.2233 2.4859  
 N 2.7003 2.8226 1.3945  
 H 0.5786 2.1363 5.4957  
 H -0.4256 0.9414 3.4834  
 H -1.0347 2.4732 2.8921  
 H 0.6722 3.3171 0.8364  
 H 4.2887 2.0478 2.6104  
 H 3.2035 2.9429 0.5240  
 C 5.8196 7.2764 1.3122  
 C 5.8164 6.3537 2.5314  
 C 6.4728 4.9797 2.3104  
 C 6.3779 4.1377 3.5883  
 C 5.8442 4.2452 1.1173  
 H 5.2214 6.8676 0.4919  
 H 4.7799 6.1912 2.8605  
 H 6.3239 6.8529 3.3665  
 H 7.5373 5.1378 2.0846  
 H 5.3299 3.9486 3.8527

H 6.8740 3.1717 3.4655  
H 6.8366 4.6571 4.4367  
H 4.7534 4.2925 1.1916  
H 6.1385 3.1910 1.0887  
H 6.1271 4.7005 0.1639  
H 0.3594 -0.9265 -5.1823  
H -7.6826 4.2434 3.7555  
H 12.4115 4.5593 -1.9291  
H 11.7691 5.3389 -3.3925  
H -10.1966 2.2739 -4.7895  
H -9.6019 0.6056 -4.8630  
H -0.1430 3.6379 4.9259  
H -1.1824 2.2830 5.4018  
H 6.8373 7.4295 0.9346  
H 5.4067 8.2592 1.5607  
H 0.8123 -0.6632 7.3795  
H 2.1067 -0.2094 8.5050  
H 2.3995 -2.2784 6.2310  
H 2.1505 -2.6971 7.9402  
H 3.6367 -1.8873 7.4278  
H 8.9486 -6.6651 -0.9390  
H 9.8330 -5.5907 -2.0375  
H 4.4125 -6.9929 -1.5931  
H 0.5335 -7.6982 -4.7888  
H -1.1440 -8.2198 -4.6632  
H 3.8845 -5.7806 -5.7992  
H 2.3132 0.9013 4.6009  
H -4.9213 2.2540 1.1054  
C 2.1065 6.3486 -4.1787  
C 0.9812 5.7629 -3.3391  
O 0.9774 4.5951 -2.9405  
N -0.0347 6.6373 -3.0719  
C -1.3433 6.1100 -2.7244  
C -2.0135 5.5674 -3.9961  
O -1.8583 6.1527 -5.0670  
N -2.7492 4.4496 -3.8326  
C -3.4371 3.8251 -4.9542  
C -3.6589 2.3313 -4.7356  
C -2.3838 1.4871 -4.5611  
C -2.7602 0.0036 -4.5458  
C -1.3277 1.7881 -5.6293  
H 3.0246 5.7887 -3.9997  
H 1.8355 6.2470 -5.2351  
H -1.2416 5.3497 -1.9510  
H -1.9550 6.9230 -2.3219  
H -4.3197 2.1714 -3.8733  
H -4.2144 1.9572 -5.6056  
H -1.9370 1.7269 -3.5888  
H -0.4542 1.1445 -5.4945  
H -1.7247 1.6155 -6.6374  
H -0.9753 2.8220 -5.5741  
H -3.2231 -0.2889 -5.4963  
H -3.4789 -0.2133 -3.7528  
H -1.8835 -0.6241 -4.3871  
H -2.8440 4.0148 -5.8518  
C -4.5581 -2.8052 3.9658  
C -3.1365 -2.2132 3.9336  
O -2.9515 -0.9986 4.0009  
C -5.5337 -1.9633 3.1175  
C -5.2395 -2.0504 1.6300  
N -6.0782 -2.8026 0.8829  
O -4.2534 -1.4800 1.1251  
N -2.0921 -3.0891 3.9010  
C -0.7243 -2.6135 4.0886  
C -0.0528 -2.1902 2.7735  
O -0.3914 -2.6607 1.6862  
C -0.0004 -3.8671 4.6250  
C -0.6934 -5.0008 3.8541  
C -2.1639 -4.5548 3.7897  
N 0.9880 -1.3372 2.9457  
C 1.9545 -1.0575 1.9074  
C 3.3815 -1.2630 2.4133  
O 3.6340 -1.9435 3.4133  
N 4.3358 -0.6423 1.6809  
C 5.7577 -0.8263 1.9635  
C 6.2985 0.1413 3.0522  
O 7.2218 0.9317 2.8258

C 6.6097 -0.8158 0.7049  
O 6.4881 0.4177 -0.0226  
N 5.6959 -0.0143 4.2516  
C 6.0939 0.6777 5.4763  
H -6.5578 -2.2927 3.3095  
H -5.4324 -0.9110 3.3969  
H -4.5804 -3.8489 3.6452  
H -0.1810 -3.9560 5.7012  
H 1.0786 -3.8233 4.4592  
H -0.5802 -5.9777 4.3295  
H -0.2871 -5.0577 2.8417  
H -2.7442 -4.9767 4.6194  
H -2.6353 -4.8568 2.8496  
H -0.7205 -1.7767 4.7909  
H 1.8533 -0.0375 1.5263  
H 1.7581 -1.7290 1.0711  
H 7.6514 -0.9571 0.9988  
H 6.3158 -1.6536 0.0666  
H 7.2180 0.4189 -0.6627  
H 5.8516 -1.8339 2.3871  
H 6.8930 1.3752 5.2272  
H 2.2671 7.4079 -3.9635  
H -4.4056 4.3176 -5.1141  
H -2.7239 3.9848 -2.9265  
H -0.0791 7.4372 -3.6907  
H 6.4643 -0.0431 6.2128  
H 5.2456 1.2203 5.9007  
H 4.9699 -0.7260 4.3076  
H 1.2385 -1.0433 3.8865  
H -6.9595 -3.1593 1.2628  
H -5.9637 -2.7454 -0.1258  
H 4.0613 -0.0460 0.8970  
H -4.8867 -2.7793 5.0108  
C -10.3342 -4.9077 2.9765  
C -9.5214 -4.2780 1.8654  
O -8.3874 -3.8362 2.0850  
C -10.7504 -3.8130 3.9657  
N -10.1319 -4.1576 0.6676  
C -9.5160 -3.4634 -0.4498  
C -8.4701 7.2795 2.6006  
C -8.0881 6.1403 1.6625  
C -8.2709 6.5018 0.1876  
N -8.3402 5.4219 -0.6372  
O -8.3413 7.6611 -0.2074  
H -9.8658 -3.2961 4.3447  
H -11.2950 -4.2377 4.8132  
H -11.3963 -3.0730 3.4830  
H -11.2119 -5.4327 2.5837  
H -8.6678 -4.0289 -0.8512  
H -7.0350 5.8613 1.8009  
H -8.6623 5.2351 1.8800  
H -8.1497 4.4861 -0.2821  
H -8.3605 5.5988 -1.6298  
H -9.5384 7.5040 2.5282  
H -8.2437 7.0232 3.6402  
H -7.9297 8.1901 2.3330  
H -9.6987 -5.6453 3.4746  
H -9.1539 -2.4816 -0.1332  
H -10.2560 -3.3302 -1.2392  
H -11.0513 -4.5531 0.5518  
O 3.9279 1.1219 -0.6092  
H 3.5198 0.7394 -1.4042  
H 4.8912 0.9348 -0.6509

### Benzoylformate Model D

#### AP

C 11.4501 5.3380 -0.0942  
C 11.1173 4.0900 -0.9240  
C 9.8670 3.4215 -0.4453  
C 8.6116 3.4387 -1.0112  
N 9.8340 2.7294 0.7517  
C 8.5778 2.3359 0.8968  
N 7.7980 2.7489 -0.1399

H 10.6513 6.0821 -0.1793  
H 11.9523 3.3813 -0.8618  
H 11.0066 4.3616 -1.9811  
H 8.2344 3.8788 -1.9219  
H 8.1738 1.7314 1.6981  
H 6.8270 2.4659 -0.2890  
C -9.3408 2.3192 -4.4820  
C -8.4081 2.9808 -3.4546  
C -7.3974 1.9927 -2.9258  
C -6.3840 1.5117 -3.7661  
C -7.4764 1.4717 -1.6303  
C -5.4983 0.5297 -3.3423  
C -6.5941 0.4861 -1.1864  
C -5.6054 0.0018 -2.0509  
O -4.7445 -0.9936 -1.7135  
H -9.8803 1.4819 -4.0274  
H -8.9968 3.3916 -2.6265  
H -7.8961 3.8290 -3.9271  
H -6.2860 1.9167 -4.7702  
H -8.2329 1.8523 -0.9485  
H -4.7092 0.1622 -3.9887  
H -6.6541 0.1142 -0.1708  
H -4.6454 -1.1049 -0.7273  
C -0.1297 -6.4752 -5.2736  
C -0.3086 -6.3219 -3.7596  
C -1.6894 -5.9042 -6.2798  
C -1.9291 -5.7738 -1.9040  
C -2.7532 -5.6226 -4.1458  
C -3.1695 -5.3839 -1.4072  
C -4.0033 -5.2318 -3.6656  
C -4.2203 -5.1137 -2.2916  
O -5.4692 -4.7516 -1.8686  
H -0.3234 -5.5342 -5.7997  
H -0.0424 -7.2694 -3.2734  
H 0.4247 -5.5945 -3.3857  
H -1.1262 -5.9751 -1.2017  
H -2.6132 -5.7050 -5.2184  
H -3.3151 -5.2719 -0.3355  
H -4.8202 -5.0128 -4.3452  
H -5.4598 -4.5889 -0.9123  
C 5.1010 -4.0526 -5.5087  
C 5.2908 -4.8912 -4.2668  
O 6.3433 -5.4781 -4.0257  
C 5.8464 -2.7168 -5.3898  
H 5.4992 -4.6234 -6.3531  
H 6.9097 -2.8873 -5.2073  
H 5.4532 -2.1290 -4.5556  
H 5.7391 -2.1278 -6.3056  
N 4.2287 -4.9122 -3.4197  
C 4.3820 -5.4878 -2.0980  
C 3.0783 -5.4977 -1.3136  
C 2.4196 -4.1217 -1.1056  
C 1.2493 -4.2789 -0.1303  
C 3.4245 -3.0657 -0.6234  
H 3.4683 -4.2685 -3.5765  
H 5.1466 -4.9355 -1.5420  
H 3.2955 -5.9276 -0.3281  
H 2.3570 -6.1707 -1.7964  
H 2.0022 -3.7873 -2.0703  
H 1.6189 -4.4233 0.8909  
H 0.5880 -3.4131 -0.1159  
H 0.6366 -5.1474 -0.3946  
H 4.2180 -2.8795 -1.3538  
H 3.8970 -3.3904 0.3088  
H 2.9473 -2.1037 -0.4237  
C 9.2896 -5.3498 -0.7407  
C 7.9342 -4.6318 -0.7399  
C 8.0280 -3.1473 -1.0242  
C 7.3961 -2.6018 -2.1475  
C 8.7397 -2.2843 -0.1798  
C 7.4604 -1.2320 -2.4120  
C 8.8081 -0.9161 -0.4406  
C 8.1617 -0.3825 -1.5574  
H 9.9657 -4.9327 0.0125  
H 7.4471 -4.7845 0.2330  
H 7.2956 -5.0973 -1.4959  
H 6.8742 -3.2699 -2.8222

H 9.2318 -2.6842 0.7029  
H 6.9744 -0.8285 -3.2964  
H 9.3505 -0.2564 0.2283  
H 8.2108 0.6829 -1.7508  
C -2.6500 0.7384 0.5010  
C -1.4008 0.9913 -0.0291  
C -1.2191 2.2515 -0.6641  
N 0.0041 2.7011 -1.0291  
N -2.3010 3.0234 -0.9193  
C -3.4892 2.6602 -0.4238  
N -3.6969 1.5764 0.3437  
S 1.6072 -0.8906 -3.2029  
C 1.3112 -0.1499 -1.7068  
C -4.6730 3.5228 -0.7398  
N 0.1739 -0.5522 -1.1662  
C -0.5380 -1.5015 -1.9160  
C -1.8383 -2.0389 -1.4375  
C 0.1134 -1.7963 -3.0794  
C -0.3333 -2.6796 -4.1987  
C -0.2812 0.0128 0.1414  
H 2.0293 0.4579 -1.1478  
H 0.0481 3.6244 -1.4623  
H -0.5892 -0.8308 0.7588  
H 0.5977 0.4770 0.5853  
H -5.3424 3.5587 0.1198  
H -4.3580 4.5266 -1.0237  
H -5.2292 3.0853 -1.5755  
H -2.8404 -0.1583 1.0834  
H -1.8019 -2.2888 -0.3747  
H -2.0895 -2.9448 -1.9875  
H -2.6388 -1.3183 -1.6097  
H -1.1080 -3.3683 -3.8600  
H 0.4940 -3.2751 -4.5965  
C 1.7199 -3.0460 7.4069  
C 0.8596 -1.8066 7.1048  
C 1.6791 -0.6703 6.4605  
O 1.7980 -0.7174 5.1682  
O 2.1842 0.1855 7.1950  
C -8.3697 2.5845 4.0389  
C -7.3961 1.5088 3.5584  
C -6.5261 1.9382 2.3896  
O -6.5851 3.0554 1.8846  
O -5.7079 0.9813 1.9956  
H -8.9581 2.2132 4.8833  
H -7.8361 3.4805 4.3615  
H -7.9246 0.5967 3.2544  
H -6.7157 1.1958 4.3592  
C -0.9026 1.7807 5.5771  
C -1.0469 1.2731 4.1436  
C 0.0510 1.7800 3.2771  
C 0.0493 2.6407 2.2064  
N 1.3762 1.4308 3.4564  
C 2.0967 2.0472 2.4785  
N 1.3238 2.7835 1.6895  
H 0.0472 1.4696 6.0199  
H -1.0648 0.1784 4.1313  
H -2.0026 1.5948 3.7159  
H -0.7978 3.1626 1.7857  
H 3.1612 1.9211 2.3708  
C 5.4090 7.0180 3.3908  
C 5.1126 5.6500 4.0170  
C 5.5774 4.4342 3.1929  
C 5.3347 3.1365 3.9781  
C 4.9019 4.3728 1.8177  
H 4.8726 7.1540 2.4466  
H 4.0315 5.5570 4.1927  
H 5.5857 5.6019 5.0071  
H 6.6619 4.5318 3.0306  
H 4.2698 3.0205 4.2124  
H 5.6548 2.2526 3.4170  
H 5.8766 3.1404 4.9307  
H 3.8108 4.3294 1.9033  
H 5.2238 3.4839 1.2713  
H 5.1506 5.2395 1.1971  
H -0.7460 -2.0851 -5.0215  
H -9.0565 2.8746 3.2421  
H 11.5411 5.0679 0.9615

H 12.3894 5.8018 -0.4179  
H -10.0770 3.0300 -4.8726  
H -8.7695 1.9236 -5.3273  
H -0.9386 2.8747 5.6027  
H -1.7095 1.3981 6.2121  
H 6.4794 7.1307 3.1814  
H 5.1120 7.8325 4.0609  
H 0.0348 -2.0868 6.4402  
H 0.4288 -1.4197 8.0331  
H 2.1757 -3.4281 6.4874  
H 1.1236 -3.8465 7.8583  
H 2.5278 -2.7862 8.0976  
H 9.1665 -6.4170 -0.5282  
H 9.7758 -5.2507 -1.7163  
H 4.7661 -6.5051 -2.2168  
H 0.8948 -6.7807 -5.5034  
H -0.8069 -7.2314 -5.6835  
H 4.0361 -3.8765 -5.7045  
H -5.0172 1.2868 1.2952  
C 2.2345 7.0214 -2.5014  
C 0.9204 6.3397 -2.1945  
O 0.7077 5.1595 -2.4926  
N -0.0198 7.0889 -1.5652  
C -1.3702 6.5713 -1.4382  
C -1.9898 6.3266 -2.8262  
O -1.9143 7.1748 -3.7113  
N -2.6141 5.1360 -2.9416  
C -3.1820 4.6787 -4.1980  
C -3.1085 3.1555 -4.3031  
C -1.6864 2.5736 -4.3379  
C -1.7297 1.0585 -4.1218  
C -0.9559 2.9221 -5.6384  
C 3.6383 2.1782 -2.8320  
C 2.8332 2.9152 -3.7134  
C 2.8203 2.5882 -5.0667  
C 3.6074 1.5363 -5.5457  
C 4.4132 0.8074 -4.6691  
C 4.4260 1.1195 -3.3098  
C 3.6466 2.5468 -1.3835  
O 3.2414 3.6293 -0.9884  
C 4.1583 1.4679 -0.4188  
O 5.4059 1.4289 -0.2595  
O 3.3039 0.6999 0.0879  
H 3.0357 6.3896 -2.1088  
H 2.3534 7.0815 -3.5870  
H -1.3606 5.6590 -0.8369  
H -1.9722 7.3175 -0.9138  
H -3.6566 2.7193 -3.4616  
H -3.6490 2.8438 -5.2075  
H -1.1128 3.0101 -3.5136  
H 0.0409 2.4724 -5.6490  
H -1.5058 2.5459 -6.5108  
H -0.8329 4.0030 -5.7545  
H -2.3085 0.5627 -4.9123  
H -2.1929 0.8057 -3.1631  
H -0.7217 0.6368 -4.1343  
H -2.6436 5.1728 -5.0125  
H 2.2242 3.7251 -3.3210  
H 2.2004 3.1578 -5.7516  
H 3.5979 1.2901 -6.6037  
H 5.0372 0.0044 -5.0452  
H 5.0660 0.5715 -2.6249  
C -5.0462 -3.3290 3.3639  
C -3.6732 -2.6913 3.6269  
O -3.5712 -1.4902 3.8684  
C -5.9752 -2.3924 2.5759  
C -5.5545 -2.2457 1.1299  
N -6.3348 -2.8290 0.1877  
O -4.5281 -1.6235 0.8158  
N -2.6075 -3.5331 3.6634  
C -1.2788 -3.0384 4.0057  
C -0.5483 -2.4699 2.7820  
O -0.9405 -2.7223 1.6299  
C -0.5460 -4.3163 4.4613  
C -1.1178 -5.3718 3.5017  
C -2.5921 -4.9621 3.3247  
N 0.5633 -1.7921 3.0856

C 1.6364 -1.5526 2.1461  
C 2.9220 -2.2054 2.6552  
O 2.9387 -3.3698 3.0586  
C 3.9993 -1.3929 2.5952  
N 5.3449 -1.8016 2.9490  
C 5.8101 -1.3750 4.3558  
O 6.9638 -1.6387 4.6985  
C 6.3267 -1.2050 1.9337  
O 6.2293 0.2085 1.9678  
N 4.9430 -0.6924 5.1282  
C 5.3754 -0.1783 6.4191  
H -7.0037 -2.7595 2.6296  
H -5.9087 -1.3924 3.0120  
H -4.9626 -4.2943 2.8588  
H -0.8109 -4.5389 5.5000  
H 0.5385 -4.2150 4.3867  
H -1.0172 -6.3941 3.8742  
H -0.6024 -5.3048 2.5405  
H -3.2494 -5.5253 3.9994  
H -2.9329 -5.1280 2.2968  
H -1.3535 -2.2790 4.7857  
H 1.7933 -0.4872 1.9905  
H 1.3751 -2.0100 1.1947  
H 7.3334 -1.5193 2.2194  
H 6.1063 -1.5942 0.9327  
H 5.9337 0.5435 1.0925  
H 5.3866 -2.8944 2.9165  
H 6.1841 0.5474 6.2842  
H 2.3122 8.0233 -2.0736  
H -4.2307 4.9977 -4.2777  
H -2.4585 4.4380 -2.2095  
H 0.1061 8.0887 -1.5495  
H 5.7552 -0.9864 7.0538  
H 4.5147 0.2924 6.8947  
H 3.9609 -0.6159 4.8797  
H 0.8342 -1.5598 4.0650  
H -7.2390 -3.2471 0.4146  
H -6.1165 -2.6177 -0.7803  
H 3.9135 -0.4917 2.1362  
H -5.4956 -3.5253 4.3448  
C -10.7836 -5.2204 1.4624  
C -9.8369 -4.4602 0.5582  
O -8.7013 -4.1599 0.9415  
C -11.1991 -4.3026 2.6174  
N -10.3286 -4.0693 -0.6372  
C -9.5637 -3.2332 -1.5449  
C -8.9377 6.8555 3.3167  
C -8.7683 5.6314 2.4237  
C -8.6670 5.9616 0.9361  
N -8.1245 4.9544 0.1848  
O -9.0846 7.0064 0.4508  
H -10.3128 -3.9479 3.1483  
H -11.8415 -4.8309 3.3270  
H -11.7468 -3.4301 2.2476  
H -11.6607 -5.5815 0.9141  
H -8.6662 -3.7529 -1.8969  
H -7.8950 5.0422 2.7125  
H -9.6325 4.9637 2.5385  
H -7.5922 4.2172 0.6334  
H -7.9340 5.1617 -0.7844  
H -9.7825 7.4614 2.9805  
H -9.1058 6.5562 4.3557  
H -8.0477 7.4912 3.2850  
H -10.2467 -6.0922 1.8470  
H -9.2497 -2.3082 -1.0519  
H -10.1841 -2.9811 -2.4053  
H -11.2620 -4.3484 -0.8933  
H 0.7676 2.5542 -0.3585  
H 1.7116 0.7594 1.7162

### APH<sup>+</sup>

C 11.4421 5.3589 -0.2237  
C 11.1018 4.1171 -1.0592  
C 9.8580 3.4467 -0.5679  
C 8.6037 3.4416 -1.1348  
N 9.8298 2.7800 0.6436

|   |         |         |         |   |         |         |         |   |          |         |         |
|---|---------|---------|---------|---|---------|---------|---------|---|----------|---------|---------|
| C | 8.5765  | 2.3808  | 0.7976  | H | 7.2775  | -5.0831 | -1.4405 | H | -9.1415  | 2.5111  | 3.2786  |
| N | 7.7954  | 2.7641  | -0.2496 | H | 6.8558  | -3.2629 | -2.7839 | H | 11.5417  | 5.0807  | 0.8291  |
| H | 10.6425 | 6.1034  | -0.2966 | H | 9.2511  | -2.6616 | 0.7133  | H | 12.3785  | 5.8250  | -0.5522 |
| H | 11.9389 | 3.4094  | -1.0143 | H | 6.9578  | -0.8237 | -3.2735 | H | -10.0738 | 3.0118  | -4.8767 |
| H | 10.9762 | 4.3967  | -2.1124 | H | 9.3731  | -0.2371 | 0.2215  | H | -8.9091  | 1.7585  | -5.3369 |
| H | 8.2246  | 3.8576  | -2.0560 | H | 8.2154  | 0.6930  | -1.7512 | H | -0.9507  | 2.9621  | 5.5007  |
| H | 8.1770  | 1.7898  | 1.6112  | C | -2.6883 | 0.7720  | 0.6015  | H | -1.6805  | 1.5077  | 6.2054  |
| H | 6.8221  | 2.4886  | -0.3839 | C | -1.4525 | 1.0202  | 0.0560  | H | 6.4853   | 7.1896  | 3.0539  |
| C | -9.3651 | 2.2738  | -4.4858 | C | -1.2767 | 2.2811  | -0.5990 | H | 5.1185   | 7.9043  | 3.9241  |
| C | -8.2926 | 2.9357  | -3.6053 | N | -0.0674 | 2.7315  | -0.9699 | H | 0.0462   | -1.9502 | 6.5101  |
| C | -7.3209 | 1.9146  | -3.0636 | N | -2.3623 | 3.0530  | -0.8635 | H | 0.5157   | -1.2666 | 8.0751  |
| C | -6.4382 | 1.2588  | -3.9333 | C | -3.5402 | 2.7274  | -0.3438 | H | 2.1653   | -3.3326 | 6.4970  |
| C | -7.3095 | 1.5441  | -1.7145 | N | -3.7151 | 1.6419  | 0.4388  | H | 1.1493   | -3.7133 | 7.9062  |
| C | -5.5895 | 0.2562  | -3.4821 | S | 1.5542  | -0.9187 | -3.0937 | H | 2.5829   | -2.6827 | 8.0876  |
| C | -6.4635 | 0.5391  | -1.2409 | C | 1.2585  | -0.1498 | -1.6131 | H | 9.1621   | -6.4023 | -0.4980 |
| C | -5.6065 | -0.1150 | -2.1330 | C | -4.7235 | 3.5955  | -0.6234 | H | 9.7511   | -5.2483 | -1.7081 |
| O | -4.7773 | -1.1277 | -1.7554 | N | 0.1219  | -0.5470 | -1.0614 | H | 4.7863   | -6.5020 | -2.1596 |
| H | -9.9273 | 1.5303  | -3.9116 | C | -0.5823 | -1.5186 | -1.7891 | H | 0.8810   | -6.8052 | -5.4223 |
| H | -8.7702 | 3.4676  | -2.7744 | C | -1.8847 | -2.0529 | -1.3169 | H | -0.8063  | -7.2733 | -5.6619 |
| H | -7.7584 | 3.6921  | -4.1950 | C | 0.0728  | -1.8371 | -2.9447 | H | 4.0163   | -3.8701 | -5.6519 |
| H | -6.4132 | 1.5432  | -4.9826 | C | -0.3705 | -2.7597 | -4.0338 | H | -4.6909  | 1.4485  | 1.0275  |
| H | -7.9492 | 2.0598  | -1.0036 | C | -0.3324 | 0.0387  | 0.2346  | C | 2.2159   | 7.0067  | -2.6145 |
| H | -4.8994 | -0.2457 | -4.1513 | H | 1.9874  | 0.4567  | -1.0663 | C | 0.9072   | 6.3294  | -2.2685 |
| H | -6.4425 | 0.3058  | -0.1813 | H | -0.0128 | 3.6426  | -1.4311 | O | 0.7025   | 5.1331  | -2.4985 |
| H | -4.6658 | -1.1752 | -0.7660 | H | -0.6466 | -0.7884 | 0.6700  | N | -0.0348  | 7.1007  | -1.6672 |
| C | -0.1529 | -6.5259 | -5.2009 | H | 0.5435  | 0.5119  | 0.8753  | C | -1.3848  | 6.5839  | -1.5346 |
| C | -0.3668 | -6.4464 | -3.6853 | H | -5.4249 | 3.5852  | 0.2153  | C | -1.9868  | 6.2955  | -2.9224 |
| C | -1.7468 | -6.0121 | -3.2170 | H | -4.3985 | 4.6091  | -0.8556 | O | -1.8448  | 7.0886  | -3.8483 |
| C | -1.9621 | -5.7559 | -1.8549 | H | -5.2609 | 3.1945  | -1.4897 | N | -2.6663  | 5.1302  | -2.9994 |
| C | -2.8384 | -5.8521 | -4.0794 | H | -2.9082 | -0.1068 | 1.1982  | C | -3.2064  | 4.6396  | -4.2580 |
| C | -3.2060 | -5.3637 | -1.3670 | H | -1.9031 | -2.1873 | -0.2347 | C | -3.1978  | 3.1112  | -4.2970 |
| C | -4.0919 | -5.4610 | -3.6081 | H | -2.0631 | -3.0271 | -1.7705 | C | -1.8035  | 2.4683  | -4.2446 |
| C | -4.2847 | -5.2167 | -2.2469 | H | -2.7033 | -1.4004 | -1.6260 | C | -1.9206  | 0.9625  | -3.9971 |
| O | -5.5346 | -4.8533 | -1.8311 | H | -1.1022 | -3.4756 | -3.6565 | C | -0.9915  | 2.7511  | -5.5127 |
| H | -0.3539 | -5.5643 | -5.6855 | H | 0.4693  | -3.3259 | -4.4473 | C | 3.6332   | 2.6686  | -2.8636 |
| H | -0.1391 | -7.4270 | -3.2461 | C | 1.7473  | -2.9312 | 7.4261  | C | 2.8397   | 2.7857  | -3.7718 |
| H | 0.3765  | -5.7622 | -3.2549 | C | 0.9026  | -1.6773 | 7.1379  | C | 2.8445   | 2.4280  | -5.1173 |
| H | -1.1370 | -5.8531 | -1.1567 | C | 1.7111  | -0.5661 | 6.4385  | C | 3.6373   | 1.3646  | -5.5616 |
| H | -2.7184 | -6.0314 | -5.1427 | O | 1.8276  | -0.6790 | 5.1491  | C | 4.4333   | 0.6574  | -4.6590 |
| H | -3.3300 | -5.1467 | -0.3088 | O | 2.2042  | 0.3364  | 7.1224  | C | 4.4296   | 1.0015  | -3.3075 |
| H | -4.9298 | -5.3374 | -4.2856 | C | -8.3590 | 2.6504  | 4.0269  | C | 3.6098   | 2.4577  | -1.4219 |
| H | -5.5146 | -4.6220 | -0.8889 | C | -7.1276 | 1.8007  | 3.7087  | O | 3.1555   | 3.5275  | -1.0440 |
| C | 5.0755  | -4.1042 | -5.4891 | C | -6.4709 | 2.0830  | 2.3440  | C | 4.1575   | 1.4190  | -0.4342 |
| C | 5.2670  | -4.9199 | -4.2325 | O | -6.9091 | 3.0153  | 1.6323  | O | 5.4055   | 1.4297  | -0.2911 |
| O | 6.3303  | -5.4791 | -3.9742 | O | -5.6899 | 1.1433  | 1.9278  | O | 3.3315   | 0.6456  | 0.1151  |
| C | 5.9044  | -2.8146 | -5.4339 | H | -8.7607 | 2.3695  | 5.0055  | H | 3.0229   | 6.4286  | -2.1563 |
| H | 5.4066  | -4.7185 | -6.3327 | H | -8.1108 | 3.7076  | 4.0533  | H | 2.3526   | 6.2969  | 3.6987  |
| H | 6.9593  | -3.0476 | -5.2743 | H | -7.3404 | 0.7299  | 3.7458  | H | -1.3789  | 5.6910  | -0.9049 |
| H | 5.5728  | -2.1805 | -4.6068 | H | -6.3594 | 1.9729  | 4.4748  | H | -1.9942  | 7.3429  | -1.0373 |
| H | 5.8064  | -2.2465 | -6.3637 | C | -0.8852 | 1.8702  | 5.5446  | H | -3.8044  | 2.7320  | -3.4666 |
| N | 4.1993  | -4.9528 | -3.3915 | C | -1.0163 | 1.2700  | 4.1470  | H | -3.7125  | 2.7855  | -5.2107 |
| C | 4.3713  | -5.4952 | -2.0571 | C | 0.0616  | 1.7769  | 3.2572  | H | -1.2525  | 2.9047  | -3.4054 |
| C | 3.0740  | -5.5354 | -1.2662 | C | 0.0415  | 2.6634  | 2.2084  | H | -0.0139  | 2.2646  | -5.4576 |
| C | 2.3797  | -4.1772 | -1.0622 | N | 1.3895  | 1.4251  | 3.4064  | H | -1.5098  | 2.3710  | -6.4024 |
| C | 1.2350  | -4.3582 | -0.0602 | C | 2.0937  | 2.0634  | 2.4314  | H | -0.8201  | 3.8224  | -5.6516 |
| C | 3.3659  | -3.0894 | -0.6132 | N | 1.3069  | 2.8168  | 1.6717  | H | -2.4759  | 0.4719  | -4.8064 |
| H | 3.4340  | -4.3163 | -3.5550 | H | 0.0738  | 1.6109  | 6.0017  | H | -2.4490  | 0.7482  | -3.0628 |
| H | 5.1222  | -4.9104 | -1.5156 | H | -0.9829 | 0.1777  | 4.1988  | H | -0.9313  | 0.5015  | -3.9463 |
| H | 3.3095  | -5.9529 | -0.2795 | H | -1.9866 | 1.5248  | 3.7074  | H | -2.6171  | 5.0770  | -5.0689 |
| H | 2.3688  | -6.2319 | -1.7394 | H | -0.8103 | 3.2042  | 1.8222  | H | 2.2296   | 3.6066  | -3.4046 |
| H | 1.9359  | -3.8676 | -2.0235 | H | 3.1554  | 1.9377  | 2.3001  | H | 2.2346   | 2.9818  | -5.8237 |
| H | 1.6304  | -4.4481 | 0.9577  | C | 5.4146  | 7.0814  | 3.2642  | H | 3.6405   | 1.0937  | -6.6136 |
| H | 0.5281  | -3.5288 | -0.0623 | C | 5.1150  | 5.7212  | 3.9072  | H | 5.0630   | -0.1534 | -5.0091 |
| H | 0.6685  | -5.2701 | -0.2794 | C | 5.5628  | 4.4878  | 3.0983  | H | 5.0641   | 0.4719  | -2.6032 |
| H | 4.1394  | -2.8922 | -1.3618 | C | 5.3256  | 3.2071  | 3.9137  | C | -5.0353  | -3.2698 | 3.4151  |
| H | 3.8655  | -3.3899 | 0.3128  | C | 4.8703  | 4.3990  | 1.7322  | C | -3.6380  | -2.6676 | 3.6410  |
| H | 2.8696  | -2.1374 | -0.4151 | H | 4.8789  | 7.2066  | 2.3180  | O | -3.4911  | -1.4597 | 3.8190  |
| C | 9.2845  | -5.3374 | -0.7220 | H | 4.0349  | 5.6384  | 4.0945  | C | -5.9349  | -2.3200 | 2.6037  |
| C | 7.9315  | -4.6141 | -0.7001 | H | 5.5968  | 5.6827  | 4.8935  | C | -5.5283  | -2.2240 | 1.1494  |
| C | 8.0255  | -3.1317 | -0.9966 | H | 6.6454  | 4.5761  | 2.9190  | N | -6.2995  | -2.8633 | 0.2351  |
| C | 7.3846  | -2.5917 | -2.1176 | H | 4.2667  | 3.1085  | 4.1824  | O | -4.5187  | -1.5900 | 0.7987  |
| C | 8.7503  | -2.2655 | -0.1662 | H | 5.6220  | 2.3084  | 3.3628  | N | -2.5952  | -3.5356 | 3.7183  |
| C | 7.4508  | -1.2236 | -2.3913 | H | 5.8941  | 3.2228  | 4.8505  | C | -1.2588  | -3.0516 | 4.0483  |
| C | 8.8212  | -0.8995 | -0.4369 | H | 3.7801  | 4.3630  | 1.8322  | C | -0.5277  | -2.5003 | 2.8170  |
| C | 8.1637  | -0.3708 | -1.5496 | H | 5.1821  | 3.4945  | 1.2037  | O | -0.9245  | -2.7556 | 1.6671  |
| H | 9.9770  | -4.9163 | 0.0137  | H | 5.1167  | 5.2507  | 1.0900  | C | -0.5363  | -4.3291 | 4.5218  |
| H | 7.4620  | -4.7572 | 0.2828  | H | -0.8361 | -2.2002 | -4.8528 | C | -1.1406  | -5.4003 | 3.6008  |

C -2.6143 -4.9800 3.4558  
N 0.5907 -1.8281 3.1098  
C 1.6510 -1.5868 2.1563  
C 2.9530 -2.2057 2.6690  
O 2.9884 -3.3586 3.1024  
N 4.0188 -1.3794 2.5809  
C 5.3696 -1.7634 2.9466  
C 5.8319 -1.3028 4.3438  
O 6.9890 -1.5486 4.6878  
C 6.3517 -1.1842 1.9223  
O 6.2729 0.2307 1.9427  
N 4.9617 -0.6118 5.1052  
C 5.3972 -0.0749 6.3860  
H -6.9747 -2.6503 2.6738  
H -5.8335 -1.3071 3.0050  
H -4.9903 -4.2544 2.9430  
H -0.7844 -4.5228 5.5704  
H 0.5480 -4.2433 4.4264  
H -1.0383 -6.4157 3.9911  
H -0.6511 -5.3568 2.6244  
H -3.2533 -5.4972 4.1833  
H -2.9969 -5.1956 2.4524  
H -1.3215 -2.2804 4.8181  
H 1.7874 -0.5226 1.9751  
H 1.3856 -2.0675 1.2175  
H 7.3562 -1.5057 2.2074  
H 6.1243 -1.5796 0.9252  
H 5.9602 0.5560 1.0716  
H 5.4222 -2.8562 2.9401  
H 6.3052 0.5176 6.2460  
H 2.2679 8.0438 -2.2770  
H -4.2357 4.9994 -4.3914  
H -2.5558 4.4621 -2.2372  
H 0.0803 8.1011 -1.7129  
H 5.6260 -0.8761 7.0992  
H 4.5873 0.5366 6.7834  
H 3.9725 -0.5727 4.8741  
H 0.8656 -1.5801 4.0832  
H -7.2075 -3.2613 0.4820  
H -6.1086 -2.6538 -0.7394  
H 3.9183 -0.4961 2.0902  
H -5.4814 -3.4134 4.4063  
C -10.7717 -5.1899 1.5659  
C -9.8286 -4.4440 0.6453  
O -8.6862 -4.1498 1.0126  
C -11.1907 -4.2558 2.7069  
N -10.3306 -4.0639 -0.5501  
C -9.5731 -3.2400 -1.4758  
C -8.9321 6.9114 3.2515  
C -8.6378 5.7674 2.2878  
C -8.4220 6.2142 0.8418  
N -7.9726 5.2079 0.0323  
O -8.6510 7.3568 0.4425  
H -10.3061 -3.8866 3.2307  
H -11.8285 -4.7771 3.4258  
H -11.7443 -3.3926 2.3245  
H -11.6481 -5.5640 1.0249  
H -8.6795 -3.7663 -1.8279  
H -7.7530 5.2027 2.5927  
H -9.4569 5.0392 2.2925  
H -7.6493 4.3406 0.4477  
H -7.7012 5.4539 -0.9052  
H -9.8010 7.4842 2.9185  
H -9.1257 6.5272 4.2570  
H -8.0891 7.6051 3.3053  
H -10.2310 -6.0532 1.9640  
H -9.2543 -2.3085 -0.9983  
H -10.2006 -3.0000 -2.3344  
H -11.2733 -4.3287 -0.7862  
H 0.7223 2.5657 -0.3328  
H 1.7355 0.7478 4.1193

## IP

C 11.4745 5.2491 -0.5542  
C 11.0395 4.0006 -1.3344  
C 9.8386 3.3377 -0.7329

C 8.5601 3.2468 -1.2379  
N 9.8973 2.7288 0.5079  
C 8.6748 2.2766 0.7369  
N 7.8264 2.5719 -0.2867  
H 10.6853 6.0081 -0.5662  
H 11.8711 3.2848 -1.3558  
H 10.8232 4.2650 -2.3767  
H 8.1194 3.5988 -2.1583  
H 8.3461 1.7067 1.5959  
H 6.8681 2.2259 -0.3663  
C -9.4427 2.3967 -4.4220  
C -8.1971 2.9033 -3.6769  
C -7.3096 1.7810 -3.1866  
C -6.5489 1.0241 -4.0890  
C -7.2356 1.4477 -1.8297  
C -5.7469 -0.0276 -3.6558  
C -6.4280 0.4038 -1.3749  
C -5.6787 -0.3384 -2.2924  
O -4.8784 -1.3845 -1.9250  
H -10.0514 1.7651 -3.7667  
H -8.5097 3.5168 -2.8241  
H -7.6268 3.5636 -4.3437  
H -6.5751 1.2683 -5.1488  
H -7.7895 2.0069 -1.0796  
H -5.1498 -0.6060 -4.3531  
H -6.3695 0.2212 -0.3056  
H -4.7177 -1.3988 -0.9464  
C -0.3575 -6.5269 -5.2229  
C -0.4230 -6.2001 -3.7256  
C -1.7849 -5.7848 -3.1975  
C -2.0821 -5.9352 -1.8363  
C -2.7758 -5.2193 -4.0127  
C -3.3120 -5.5513 -1.3064  
C -4.0117 -4.8299 -3.4998  
C -4.2911 -5.0046 -2.1426  
O -5.5381 -4.6682 -1.7023  
H -0.5612 -5.6459 -5.8400  
H -0.0831 -7.0718 -3.1537  
H 0.3063 -5.4080 -3.5026  
H -1.3384 -6.3686 -1.1735  
H -2.5896 -5.0808 -5.0728  
H -3.5133 -5.6805 -0.2460  
H -4.7696 -4.3852 -4.1348  
H -5.5543 -4.6280 -0.7342  
C 4.8954 -4.1754 -5.6242  
C 5.1305 -4.9627 -4.3577  
O 6.2075 -5.4991 -4.1016  
C 5.4985 -2.7664 -5.5227  
H 5.3683 -4.7215 -6.4455  
H 6.5784 -2.8249 -5.3688  
H 5.0664 -2.2150 -4.6823  
H 5.3097 -2.1971 -6.4377  
N 4.0793 -4.9866 -3.5023  
C 4.2344 -5.5279 -2.1683  
C 2.9337 -5.4678 -1.3796  
C 2.3362 -4.0617 -1.1943  
C 1.1097 -4.1618 -0.2876  
C 3.3610 -3.0570 -0.6516  
H 3.2662 -4.4261 -3.7041  
H 5.0212 -4.9810 -1.6402  
H 3.1313 -5.8919 -0.3874  
H 2.1845 -6.1169 -1.8522  
H 1.9860 -3.6922 -2.1727  
H 1.3990 -4.4649 0.7248  
H 0.5827 -3.2147 -0.1977  
H 0.3892 -4.8933 -0.6669  
H 4.1979 -2.9035 -1.3403  
H 3.7751 -3.4051 0.3012  
H 2.9131 -2.0767 -0.4723  
C 9.1723 -5.4223 -0.9215  
C 7.8212 -4.6960 -0.9311  
C 7.9374 -3.2218 -1.2532  
C 7.4288 -2.7150 -2.4543  
C 8.5689 -2.3342 -0.3712  
C 7.5358 -1.3561 -2.7589  
C 8.6781 -0.9774 -0.6710  
C 8.1563 -0.4811 -1.8679

H 9.8551 -4.9883 -0.1837  
H 7.3394 -4.8181 0.0484  
H 7.1760 -5.1733 -1.6732  
H 6.9750 -3.4066 -3.1543  
H 8.9692 -2.7085 0.5673  
H 7.1461 -0.9835 -3.7024  
H 9.1617 -0.3004 0.0246  
H 8.2421 0.5758 -2.0948  
C -2.8677 0.7102 0.6451  
C -1.6629 0.9257 0.0604  
C -1.4285 2.1780 -0.6552  
N -0.2425 2.4519 -1.0994  
N -2.5298 3.0398 -0.8064  
C -3.6660 2.7580 -0.2186  
N -3.8666 1.6338 0.5216  
S 1.4900 -0.5505 -3.0829  
C 1.0811 0.0603 -1.5547  
C -4.8245 3.7032 -0.3201  
N 0.0080 -0.5193 -1.0511  
C -0.5853 -1.4879 -1.8734  
C -1.8313 -2.1825 -1.4499  
C 0.1081 -1.6341 -3.0395  
C -0.2092 -2.5053 -4.2113  
C -0.5446 -0.0438 0.2482  
H 1.6482 0.7823 -0.9976  
H -0.2038 3.3568 -1.5736  
H -0.8546 -0.9223 0.8123  
H 0.2925 0.4327 0.7575  
H -5.7300 3.1665 -0.6075  
H -5.0263 4.1651 0.6513  
H -4.6037 4.4890 -1.0418  
H -3.1131 -0.1737 1.2224  
H -1.7942 -2.4735 -0.3980  
H -1.9805 -3.0820 -2.0448  
H -2.6971 -1.5367 -1.6051  
H -1.0124 -3.1981 -3.9582  
H 0.6601 -3.0917 -4.5277  
C 1.8120 -2.8502 7.3370  
C 1.1039 -1.5210 7.5807  
C 1.6969 -0.3649 6.8122  
O 1.5731 -0.5206 5.4892  
O 2.2260 0.6001 7.3314  
C -8.2808 2.8322 4.0679  
C -6.8917 2.5654 3.4812  
C -6.9157 2.0067 2.0455  
O -7.6721 2.5667 1.2127  
O -6.1259 1.0373 1.7983  
H -8.2293 3.4437 4.9749  
H -8.9071 3.3394 3.3346  
H -6.3120 1.8888 4.1147  
H -6.3287 3.5088 3.4306  
C -0.7921 1.9686 5.4605  
C -0.7288 1.4445 4.0214  
C 0.5391 1.8252 3.3241  
C 0.7150 2.5660 2.1808  
N 1.7894 1.4315 3.7910  
C 2.6834 1.9162 2.9378  
N 2.0739 2.6181 1.9554  
H 0.0776 1.6573 6.0419  
H -0.8397 0.3554 4.0188  
H -1.5747 1.8288 3.4419  
H 0.0161 3.0284 1.5046  
H 3.7499 1.7584 2.9796  
H 2.5132 2.9733 1.1013  
C 5.5323 7.0787 3.0243  
C 5.6074 5.7767 3.8291  
C 6.0687 4.5368 3.0395  
C 6.0756 3.3035 3.9549  
C 5.1967 4.2933 1.8025  
H 4.7780 7.0210 2.2339  
H 4.6177 5.5623 4.2573  
H 6.2823 5.9180 4.6836  
H 7.0993 4.7093 2.6962  
H 5.0770 3.1299 4.3747  
H 6.3764 2.3962 3.4208  
H 6.7605 3.4408 4.7991  
H 4.1377 4.2750 2.0798



H 5.4420 3.3393 1.3305  
H 5.3234 5.0732 1.0463  
H -0.5402 -1.9062 -5.0667  
H -8.7763 1.8899 4.3285  
H 11.6671 4.9862 0.4895  
H 12.3840 5.6914 -0.9766  
H -10.0650 3.2275 -4.7720  
H -9.1591 1.7943 -5.2914  
H -0.8150 3.0633 5.4725  
H -1.6932 1.6044 5.9641  
H 6.4936 7.3054 2.5484  
H 5.2714 7.9246 3.6691  
H 0.0373 -1.6083 7.2632  
H 1.0959 -1.2532 8.6395  
H 1.8835 -3.0719 6.2685  
H 1.2903 -3.6734 7.8344  
H 2.8328 -2.8089 7.7283  
H 9.0456 -6.4832 -0.6816  
H 9.6524 -5.3499 -1.9024  
H 4.5833 -6.5622 -2.2530  
H 0.6394 -6.8897 -5.4898  
H -1.0863 -7.2979 -5.4914  
H 3.8234 -4.1097 -5.8469  
H 1.8167 0.3273 4.9448  
H -4.7931 1.4379 0.9868  
C 2.2289 6.9954 -2.7962  
C 0.9785 6.2413 -2.3846  
O 0.8112 5.0523 -2.6579  
N 0.0482 6.9506 -1.6841  
C -1.2819 6.3816 -1.5397  
C -1.9260 6.1847 -2.9236  
O -1.7353 7.0014 -3.8229  
N -2.6928 5.0798 -3.0360  
C -3.2511 4.6847 -4.3233  
C -3.3314 3.1606 -4.4405  
C -1.9940 2.4217 -4.2628  
C -2.2141 0.9081 -4.3404  
C -0.9217 2.8852 -5.2546  
C 3.7606 2.0362 -6.2029  
C 2.9341 2.7946 -3.4484  
C 2.9701 2.5696 -4.8215  
C 3.8317 1.6059 -5.3536  
C 4.6611 0.8593 -4.5127  
C 4.6228 1.0620 -3.1352  
C 3.6576 2.2441 -1.1396  
O 3.1034 3.2297 -0.6533  
C 4.2136 1.1544 -0.2181  
O 5.4703 1.1535 -0.1006  
O 3.3851 0.4016 0.3395  
H 3.1010 6.4024 -2.5112  
H 2.2293 7.0961 -3.8853  
H -1.2270 5.4405 -0.9896  
H -1.8907 7.0786 -0.9571  
H -4.0486 2.7769 -3.7040  
H -3.7535 2.9186 -5.4258  
H -1.6133 2.6384 -3.2622  
H -0.0097 2.2919 -5.1292  
H -1.2603 2.7711 -6.2929  
H -0.6508 3.9320 -5.0902  
H -2.6067 0.6135 -5.3226  
H -2.9286 0.5693 -3.5840  
H -1.2733 0.3744 -4.1798  
H -2.6218 5.1201 -5.1040  
H 2.2628 3.5347 -3.0229  
H 2.3206 3.1444 -5.4738  
H 3.8580 1.4365 -6.4265  
H 5.3373 0.1214 -4.9307  
H 5.2678 0.4888 -2.4773  
C -5.0447 -3.1354 3.4494  
C -3.6208 -2.6093 3.6442  
O -3.3805 -1.4086 3.7536  
C -5.9259 -2.1889 2.6154  
C -5.5922 -2.2256 1.1392  
N -6.5014 -2.7813 0.3088  
O -4.5180 -1.7781 0.7014  
N -2.6439 -3.5454 3.8057  
C -1.2881 -3.1194 4.1174

C -0.5709 -2.5592 2.8868  
O -0.9003 -2.8861 1.7421  
C -0.5933 -4.4321 4.5340  
C -1.2678 -5.4634 3.6163  
C -2.7277 -4.9848 3.5265  
N 0.4825 -1.7779 3.1882  
C 1.5847 -1.5421 2.2843  
C 2.8611 -2.1727 2.8515  
O 2.8326 -3.2006 3.5280  
N 3.9887 -1.4914 2.5406  
C 5.3066 -1.9696 2.9230  
C 5.7198 -1.6349 4.3645  
O 6.6999 -2.1880 4.8576  
C 6.3666 -1.3514 2.0002  
O 6.3847 0.0585 2.1383  
N 5.0049 -0.6692 4.9847  
C 5.4790 -0.0501 6.2079  
H -6.9776 -2.4507 2.7605  
H -5.7719 -1.1523 2.9311  
H -5.0513 -4.1411 3.0213  
H -0.8103 -4.6411 5.5868  
H 0.4898 -4.3766 4.4022  
H -1.1909 -6.4879 3.9886  
H -0.8113 -5.4196 2.6246  
H -3.3634 -5.4880 4.2670  
H -3.1487 -5.1686 2.5330  
H -1.3024 -2.3683 4.9113  
H 1.7358 -0.4787 2.1073  
H 1.3509 -2.0181 1.3331  
H 7.3356 -1.7664 2.2938  
H 6.1664 -1.6426 0.9625  
H 6.0576 0.4434 1.2939  
H 5.3379 -3.0605 2.8418  
H 6.2370 0.7157 5.9997  
H 2.3015 7.9875 -2.3445  
H -4.2535 5.1153 -4.4510  
H -2.6497 4.3853 -2.2835  
H 0.0965 7.9553 -1.7659  
H 5.9348 -0.8196 6.8330  
H 4.6369 0.4048 6.7323  
H 4.2601 -0.2342 4.4635  
H 0.6808 -1.5762 4.1651  
H -7.4003 -3.1444 0.6227  
H -6.3308 -2.6933 -0.6871  
H 3.9228 -0.7308 1.8603  
H -5.4770 -3.2233 4.4537  
C -11.0188 -4.9732 1.6547  
C -10.0143 -4.3290 0.7225  
O -8.8317 -4.2061 1.0567  
C -11.2236 -4.0478 2.8582  
N -10.4984 -3.8461 -0.4422  
C -9.6675 -3.0883 -1.3609  
C -8.8135 7.0937 3.2660  
C -8.5852 5.8894 2.3628  
C -8.2244 6.2596 0.9241  
N -7.8512 5.1942 0.1697  
O -8.2834 7.4111 0.4989  
H -10.2649 -3.8527 3.3439  
H -11.9006 -4.4969 3.5903  
H -11.6474 -3.0876 2.5478  
H -11.9690 -5.1755 1.1478  
H -8.7939 -3.6758 -1.6587  
H -7.7950 5.2462 2.7601  
H -9.4826 5.2598 2.3251  
H -7.8062 4.2433 0.5506  
H -7.6100 5.3667 -0.7940  
H -9.5924 7.7425 2.8574  
H -9.1098 6.7737 4.2699  
H -7.9055 7.6977 3.3501  
H -10.6031 -5.9310 1.9809  
H -9.3140 -2.1562 -0.9082  
H -10.2487 -2.8482 -2.2516  
H -11.4833 -3.9374 -0.6329

C 10.8238 4.1850 -1.2800  
C 9.6300 3.5032 -0.6792  
C 8.3667 3.3498 -1.2093  
N 9.6946 2.8912 0.5596  
C 8.4918 2.3773 0.7636  
N 7.6494 2.6324 -0.2758  
H 10.6640 6.1077 -0.2634  
H 11.6109 3.4387 -1.4546  
H 10.5505 4.5826 -2.2651  
H 7.9266 3.6793 -2.1382  
H 8.1734 1.7925 1.6165  
H 6.7066 2.2469 -0.3702  
C -9.4414 2.2637 -4.5413  
C -8.2642 2.8843 -3.7671  
C -7.2985 1.8573 -3.2142  
C -6.5306 1.0608 -4.0765  
C -7.1451 1.6578 -1.8380  
C -5.6577 0.0952 -3.5878  
C -6.2676 0.6991 -1.3261  
C -5.5223 -0.0932 -2.2059  
O -4.6688 -1.0736 -1.7920  
H -10.0220 1.5995 -3.8929  
H -8.6521 3.4931 -2.9425  
H -7.7291 3.5737 -4.4341  
H -6.6120 1.2024 -5.1519  
H -7.7086 2.2516 -1.1250  
H -5.0617 -0.5170 -4.2562  
H -6.1684 0.5944 -0.2505  
H -4.5582 -1.0880 -0.8050  
C -0.2757 -6.5913 -5.1643  
C -0.4241 -6.4318 -3.6477  
C -1.7792 -5.9562 -3.1521  
C -2.0635 -5.9843 -1.7792  
C -2.7725 -5.4549 -4.0029  
C -3.2788 -5.5327 -1.2717  
C -3.9952 -4.9983 -3.5117  
C -4.2566 -5.0360 -2.1413  
O -5.4845 -4.6146 -1.7138  
H -0.3950 -5.6357 -5.6845  
H -0.1928 -7.3888 -3.1632  
H 0.3444 -5.7339 -3.2885  
H -1.3169 -6.3669 -1.0888  
H -2.5967 -5.4122 -0.0726  
H -3.4687 -5.5642 -0.2017  
H -4.7539 -4.6016 -4.1774  
H -5.4741 -4.4652 -0.7554  
C 4.9635 -4.2003 -5.5057  
C 5.1833 -4.9893 -4.2352  
O 6.2496 -5.5410 -3.9671  
C 5.1404 -2.6873 -5.2906  
H 5.6835 -4.5630 -6.2430  
H 6.1672 -2.4591 -4.9964  
H 4.4756 -2.3044 -4.5102  
H 4.9216 -2.1394 -6.2119  
N 4.1150 -5.0162 -3.3964  
C 4.2649 -5.5386 -2.0517  
C 2.9608 -5.4911 -1.2683  
C 2.3165 -4.0996 -1.1306  
C 1.1173 -4.2028 -0.1875  
C 3.3057 -3.0235 -0.6638  
H 3.3356 -4.4030 -3.5838  
H 5.0395 -4.9733 -1.5230  
H 3.1720 -5.8772 -0.2631  
H 2.2320 -6.1788 -1.7185  
H 1.9249 -3.7893 -2.1121  
H 1.4455 -4.4477 0.8297  
H 0.5578 -3.2717 -0.1344  
H 0.4183 -4.9800 -0.5140  
H 4.1387 -2.8950 -1.3625  
H 3.7312 -3.2827 0.3124  
H 2.8205 -2.0491 -0.5649  
C 9.1837 -5.3867 -0.7367  
C 7.8266 -4.6780 -0.8406  
C 7.9463 -3.2016 -1.1523  
C 7.4927 -2.6914 -2.3739  
C 8.5239 -2.3140 -0.2341  
C 7.6001 -1.3288 -2.6611

## YI

C 11.3963 5.3047 -0.3983

|   |         |         |         |   |          |         |         |   |          |         |         |
|---|---------|---------|---------|---|----------|---------|---------|---|----------|---------|---------|
| C | 8.6331  | -0.9538 | -0.5174 | H | 6.5090   | 3.4179  | 4.7902  | N | -2.7046  | -3.6533 | 3.6976  |
| C | 8.1657  | -0.4536 | -1.7347 | H | 3.9226   | 4.3146  | 2.0606  | C | -1.3430  | -3.2611 | 4.0225  |
| H | 9.8074  | -4.9440 | 0.0468  | H | 5.2289   | 3.3940  | 1.2964  | C | -0.6639  | -2.5460 | 2.8501  |
| H | 7.2825  | -4.8062 | 0.1051  | H | 5.1209   | 5.1355  | 1.0563  | O | -1.0406  | -2.7178 | 1.6854  |
| H | 7.2357  | -5.1620 | -1.6228 | H | -0.2722  | -2.4114 | -5.3177 | C | -0.6353  | -4.6134 | 4.2422  |
| H | 7.0777  | -3.3806 | -3.1012 | H | -8.8633  | 1.7763  | 4.1286  | C | -1.3165  | -5.5100 | 3.1959  |
| H | 8.8791  | -2.6918 | 0.7212  | H | 11.6401  | 4.9087  | 0.5910  | C | -2.7795  | -5.0262 | 3.1806  |
| H | 7.2483  | -0.9485 | -3.6161 | H | 12.3028  | 5.7353  | -0.8381 | N | 0.4215   | -1.8422 | 3.2112  |
| H | 9.0702  | -0.2767 | 0.2083  | H | -10.1122 | 3.0378  | -4.9288 | C | 1.5282   | -1.5584 | 2.3250  |
| H | 8.2457  | 0.6062  | -1.9496 | H | -9.0845  | 1.6697  | -5.3888 | C | 2.8088   | -2.1583 | 2.9165  |
| C | -2.5483 | 0.6801  | 0.5488  | H | -0.9745  | 3.0540  | 5.4376  | O | 2.7886   | -3.1819 | 3.6019  |
| C | -1.3902 | 0.9125  | -0.1405 | H | -1.8119  | 1.5941  | 5.9937  | N | 3.9242   | -1.4554 | 2.6177  |
| C | -1.2505 | 2.2064  | -0.7477 | H | 6.3738   | 7.3218  | 2.6523  | C | 5.2492   | -1.9056 | 3.0069  |
| N | -0.1099 | 2.5990  | -1.2994 | H | 5.1282   | 7.9391  | 3.7484  | C | 5.6524   | -1.5558 | 4.4471  |
| N | -2.2915 | 3.0907  | -0.7339 | H | -0.0776  | -1.5719 | 7.3717  | O | 6.6445   | -2.0838 | 4.9450  |
| C | -3.3941 | 2.7784  | -0.0719 | H | 1.0326   | -1.2002 | 8.7006  | C | 6.2966   | -1.2769 | 2.0759  |
| N | -3.5419 | 1.6107  | 0.5864  | H | 1.7089   | -3.0777 | 6.3391  | O | 6.2730   | 0.1361  | 2.1746  |
| S | 1.5518  | -0.6626 | -3.5086 | H | 1.1860   | -0.6334 | 7.9463  | N | 4.9116   | -0.6095 | 5.0666  |
| C | 1.2174  | 0.1440  | -2.0220 | H | 2.7274   | -2.7842 | 7.7435  | C | 5.3487   | -0.0042 | 6.3096  |
| C | -4.5162 | 3.7642  | -0.0101 | H | 9.0547   | -6.4494 | -0.5059 | H | -6.9963  | -2.3897 | 2.7178  |
| N | 0.1855  | -0.5153 | -1.4630 | H | 9.7303   | -5.3073 | -1.6817 | H | -5.7543  | -1.1510 | 3.0701  |
| C | -0.3949 | -1.6092 | -2.1469 | H | 4.6320   | -6.5672 | -2.1238 | H | -5.1348  | -4.1544 | 2.9112  |
| C | -1.6201 | -2.2845 | -1.6248 | H | 0.7181   | -6.9775 | -5.4083 | H | -0.8418  | -4.9691 | 5.2572  |
| C | 0.2615  | -1.8445 | -3.3145 | H | -1.0191  | -7.2868 | -5.5671 | H | 0.4464   | -4.5304 | 4.1124  |
| C | -0.0221 | -2.8762 | -4.3574 | H | 3.9571   | -4.4006 | -5.8944 | H | -1.2379  | -6.5755 | 3.4256  |
| C | -0.2585 | -0.0765 | -0.1209 | H | 1.6773   | 0.2855  | 4.9562  | H | -0.8662  | -5.3332 | 2.2166  |
| H | 0.6542  | 1.9213  | -1.4630 | H | -4.4453  | 1.4421  | 1.1887  | H | -3.4173  | -5.6477 | 3.8222  |
| H | -0.0083 | 3.5325  | -1.7005 | C | 2.1695   | 6.9646  | -2.7791 | H | -3.1931  | -5.0397 | 2.1671  |
| H | -0.5423 | -0.9520 | 0.4633  | C | 0.9036   | 6.2450  | -2.3661 | H | -1.3359  | -2.6191 | 4.9067  |
| H | 0.6268  | 0.3723  | 0.3340  | O | 0.7450   | 5.0386  | -2.5753 | H | 1.6481   | -0.4921 | 2.1524  |
| H | -5.4814 | 3.2616  | 0.0631  | N | -0.0490  | 6.9936  | -1.7494 | H | 1.3307   | -2.0331 | 1.3652  |
| H | -4.4049 | 4.3879  | 0.8843  | C | -1.3878  | 6.4442  | -1.6098 | H | 7.2756   | -1.6545 | 2.3859  |
| H | -4.4837 | 4.4184  | -0.8819 | C | -1.9996  | 6.1851  | -2.9983 | H | 6.1120   | -1.6010 | 1.0454  |
| H | -2.7414 | -0.2345 | 1.0972  | O | -1.8189  | 6.9797  | -3.9170 | H | 5.9238   | 0.4887  | 1.3219  |
| H | -1.5418 | -2.5374 | -0.5655 | N | -2.7336  | 5.0539  | -3.0893 | H | 5.3027   | -2.9965 | 2.9349  |
| H | -1.8047 | -3.2078 | -2.1727 | C | -3.2702  | 4.6017  | -4.3694 | H | 6.0916   | 0.7838  | 6.1314  |
| H | -2.4951 | -1.6427 | -1.7609 | C | -3.2945  | 3.0736  | -4.4464 | H | 2.2299   | 7.9845  | -2.3931 |
| H | -0.8620 | -3.5062 | -4.0617 | C | -1.9272  | 2.3929  | -4.2707 | H | -4.2865  | 4.9931  | -4.5082 |
| H | 0.8440  | -3.5274 | -4.5274 | C | -2.0905  | 0.8715  | -4.2130 | H | -2.6551  | 4.3823  | -2.3268 |
| C | 1.6884  | -2.8271 | 7.4034  | C | -0.9082  | 2.8118  | -5.3359 | H | 0.0174   | 7.9939  | -1.8647 |
| C | 0.9812  | -1.4875 | 7.6481  | C | 3.7716   | 1.9974  | -2.6011 | H | 5.8123   | -0.7750 | 6.9276  |
| C | 1.5652  | -0.3442 | 6.8385  | C | 3.0913   | 2.8447  | -3.4900 | H | 4.4873   | 0.4220  | 6.8268  |
| O | 1.4528  | -0.5506 | 5.5224  | C | 3.3046   | 2.7256  | -4.8591 | H | 4.1527   | -0.1963 | 4.5478  |
| O | 2.0572  | 0.6571  | 7.3259  | C | 4.2049   | 1.7742  | -5.3490 | H | 0.6292   | -1.7331 | 4.1993  |
| C | -8.4021 | 2.7562  | 3.9612  | C | 4.8931   | 0.9417  | -4.4652 | H | -7.2596  | -3.0240 | 0.5357  |
| C | -6.9022 | 2.6065  | 3.6835  | C | 4.6761   | 1.0441  | -3.0923 | H | -6.1365  | -2.4882 | -0.6980 |
| C | -6.5436 | 2.1203  | 2.2677  | C | 3.4689   | 2.1020  | -1.1531 | H | 3.8455   | -0.7127 | 1.9146  |
| O | -7.2082 | 2.5590  | 1.2950  | O | 2.8185   | 3.0459  | -0.6950 | H | -5.5780  | -3.3388 | 4.4025  |
| O | -5.5407 | 1.3369  | 2.1877  | C | 4.0502   | 1.0688  | -0.1834 | C | -10.7555 | -5.1021 | 1.6624  |
| H | -8.5894 | 3.3699  | 4.8480  | O | 5.3136   | 1.1369  | -0.0883 | C | -9.8578  | -4.3240 | 0.7221  |
| H | -8.9007 | 3.2090  | 3.1053  | O | 3.2739   | 0.3363  | 0.4583  | O | -8.7547  | -3.9129 | 1.0945  |
| H | -6.4196 | 1.9481  | 4.4104  | H | 3.0275   | 6.3885  | -2.4251 | C | -11.2732 | -4.1537 | 2.7499  |
| H | -6.4119 | 3.5859  | 3.7844  | H | 2.2107   | 6.9909  | -3.8718 | N | -10.3663 | -4.0480 | -0.4989 |
| C | -0.9271 | 1.9602  | 5.4632  | H | -1.3578  | 5.5343  | -1.0076 | C | -9.6658  | -3.2055 | -1.4525 |
| C | -0.8725 | 1.3880  | 4.0434  | H | -2.0039  | 7.1775  | -1.0827 | C | -8.9572  | 7.0087  | 3.1276  |
| C | 0.3815  | 1.7743  | 3.3277  | H | -3.9873  | 2.6848  | -3.6892 | C | -8.6496  | 5.7965  | 2.2596  |
| C | 0.5449  | 2.5191  | 2.1864  | H | -3.7241  | 2.7888  | -5.4161 | C | -8.2570  | 6.1500  | 0.8250  |
| N | 1.6369  | 1.3860  | 3.7825  | H | -1.5176  | 2.7096  | -3.3099 | N | -7.7537  | 5.0973  | 0.1286  |
| C | 2.5200  | 1.8738  | 2.9198  | H | 0.0402   | 2.2865  | -5.1819 | O | -8.4066  | 7.2729  | 0.3508  |
| N | 1.9022  | 2.5795  | 1.9460  | H | -1.2676  | 2.5746  | -6.3454 | H | -10.4323 | -3.6891 | 3.3268  |
| H | -0.0411 | 1.6887  | 6.0402  | H | -0.6975  | 3.8845  | -5.2891 | H | -11.8818 | -4.6912 | 3.4823  |
| H | -0.9537 | 0.2969  | 4.0804  | H | -2.5250  | 0.4857  | -5.1440 | H | -11.8861 | -3.3573 | 2.3165  |
| H | -1.7362 | 1.7335  | 3.4648  | H | -2.7507  | 0.5704  | -3.3937 | H | -11.5873 | -5.5721 | 1.1257  |
| H | -0.1666 | 3.0181  | 1.5513  | H | -1.1251  | 0.3815  | -4.0686 | H | -8.7506  | -3.6890 | -1.8113 |
| H | 3.5858  | 1.7099  | 2.9439  | H | -2.6529  | 5.0406  | -5.1573 | H | -7.8523  | 5.1902  | 2.6985  |
| H | 2.3273  | 2.8841  | 1.0615  | H | 2.3882   | 3.5729  | -3.0988 | H | -9.5243  | 5.1368  | 2.2034  |
| C | 5.3902  | 7.1069  | 3.0864  | H | 2.7625   | 3.3692  | -5.5455 | H | -7.5991  | 4.1836  | 0.5626  |
| C | 5.4027  | 5.7784  | 3.8508  | H | 4.3686   | 1.6821  | -6.4190 | H | -7.4803  | 5.2552  | -0.8289 |
| C | 5.8503  | 4.5467  | 3.0403  | H | 5.5970   | 0.2085  | -4.8449 | H | -9.7340  | 7.6243  | 2.6677  |
| C | 5.8332  | 3.2989  | 3.9358  | H | 5.2145   | 0.4012  | -2.4056 | H | -9.2923  | 6.6982  | 4.1221  |
| C | 4.9841  | 4.3370  | 1.7916  | C | -5.1106  | -3.1887 | 3.4220  | H | -8.0729  | 7.6420  | 3.2447  |
| H | 4.6641  | 7.0944  | 2.2677  | C | -3.6838  | -2.7077 | 3.6924  | H | -10.1545 | -5.8985 | 2.1107  |
| H | 4.3958  | 5.5818  | 4.2463  | O | -3.4477  | -1.5368 | 3.9814  | H | -9.3892  | -2.2527 | -0.9924 |
| H | 6.0574  | 5.8749  | 4.7270  | C | -5.9339  | -2.1422 | 2.6439  | H | -10.3190 | -3.0115 | -2.3037 |
| H | 6.8857  | 4.7099  | 2.7069  | C | -5.5348  | -2.0533 | 1.1853  | H | -11.2711 | -4.4178 | -0.7419 |
| H | 4.8277  | 3.1299  | 4.3406  | N | -6.3409  | -2.6602 | 0.2810  |   |          |         |         |
| H | 6.1330  | 2.3961  | 3.3941  | O | -4.4969  | -1.4730 | 0.8290  |   |          |         |         |

YIH<sup>+</sup>

|   |         |         |         |   |         |         |         |   |          |         |         |
|---|---------|---------|---------|---|---------|---------|---------|---|----------|---------|---------|
| C | 11.3077 | 5.4480  | -0.2887 | C | 8.1034  | -2.3003 | -0.4242 | H | 4.7682   | 3.1966  | 4.3566  |
| C | 10.7816 | 4.3223  | -1.1906 | C | 7.8109  | -1.5079 | -3.0669 | H | 6.1013   | 2.4941  | 3.4265  |
| C | 9.6087  | 3.5901  | -0.6069 | C | 8.1241  | -0.9446 | -0.7450 | H | 6.4366   | 3.5266  | 4.8251  |
| C | 8.3828  | 3.3267  | -1.1802 | C | 7.9767  | -0.5419 | -2.0741 | H | 3.8689   | 4.3335  | 2.0519  |
| N | 9.6632  | 3.0325  | 0.6572  | H | 9.6381  | -4.7174 | 0.2713  | H | 5.2229   | 3.4628  | 1.3113  |
| C | 8.4919  | 2.4434  | 0.8349  | H | 7.1728  | -4.8872 | -0.2054 | H | 5.0525   | 5.1996  | 1.0689  |
| N | 7.6789  | 2.5947  | -0.2484 | H | 7.5113  | -5.3340 | -1.8728 | H | -0.2605  | -2.4808 | -5.3018 |
| H | 10.5485 | 6.2252  | -0.1512 | H | 7.6340  | -3.6251 | -3.5035 | H | -8.8479  | 1.6052  | 3.9408  |
| H | 11.5970 | 3.6078  | -1.3707 | H | 8.2225  | -2.6064 | 0.6107  | H | 11.5530  | 5.0470  | 0.6980  |
| H | 10.5009 | 4.7228  | -2.1724 | H | 7.7077  | -1.2023 | -4.1061 | H | 12.2042  | 5.9132  | -0.7135 |
| H | 7.9595  | 3.5889  | -2.1380 | H | 8.2393  | -0.2026 | 0.0365  | H | -10.1059 | 2.7709  | -5.2003 |
| H | 8.1761  | 1.8810  | 1.7038  | H | 7.9951  | 0.5142  | -2.3224 | H | -9.1756  | 1.2712  | -5.3785 |
| H | 6.7458  | 2.1840  | -0.3436 | C | -2.5131 | 0.7599  | 0.5131  | H | -1.0856  | 3.0554  | 5.4347  |
| C | -9.4275 | 2.0813  | -4.6861 | C | -1.3496 | 0.9320  | -0.2002 | H | -1.9366  | 1.5849  | 5.9393  |
| C | -8.1568 | 2.7997  | -4.2022 | C | -1.1875 | 2.1955  | -0.8465 | H | 6.2161   | 7.4305  | 2.6926  |
| C | -7.1979 | 1.8694  | -3.4949 | N | -0.0406 | 2.5573  | -1.4218 | H | 4.9296   | 8.0057  | 3.7640  |
| C | -6.3964 | 0.9779  | -4.2216 | N | -2.2083 | 3.0954  | -0.8458 | H | -0.1762  | -1.5628 | 7.3205  |
| C | -7.1129 | 1.8311  | -2.0990 | C | -3.3029 | 2.8126  | -0.1368 | H | 0.8612   | -1.1684 | 8.7016  |
| C | -5.5485 | 0.0786  | -3.5838 | N | -3.4970 | 1.6903  | 0.5707  | H | 1.7019   | -3.0168 | 6.3716  |
| C | -6.2658 | 0.9410  | -1.4391 | S | 1.6191  | -0.7836 | -3.4825 | H | 1.1002   | -3.5973 | 7.9428  |
| C | -5.4796 | 0.0566  | -2.1857 | C | 1.2984  | 0.0482  | -2.0045 | H | 2.6317   | -2.7132 | 7.8353  |
| O | -4.6495 | -0.8557 | -1.6063 | C | -4.3854 | 3.8528  | -0.0964 | H | 9.1944   | -6.3330 | -0.3065 |
| H | -9.9643 | 1.6387  | -3.8408 | N | 0.2286  | -0.5602 | -1.4607 | H | 9.9853   | -5.1809 | -1.3982 |
| H | -8.4382 | 3.6171  | -3.5283 | C | -0.3864 | -1.6337 | -2.1461 | H | 4.6792   | -6.5459 | -2.0801 |
| H | -7.6577 | 3.2642  | -5.0621 | C | -1.6288 | -2.2724 | -1.6187 | H | 0.8739   | -7.0063 | -5.3806 |
| H | -6.4317 | 0.9937  | -5.3086 | C | 0.2769  | -1.9088 | -3.3008 | H | -0.8552  | -7.3492 | -5.5495 |
| H | -7.7246 | 2.5055  | -1.5051 | C | -0.0229 | -2.9426 | -4.3367 | H | 4.2409   | -4.5942 | -5.9982 |
| H | -4.9207 | -0.6032 | -4.1470 | C | -0.2383 | -0.0766 | -0.1392 | H | 1.5881   | 0.3692  | 4.9859  |
| H | -6.2115 | 0.9514  | -0.3569 | H | 0.7181  | 1.8769  | -1.5505 | H | -4.6381  | 1.6389  | 1.7466  |
| H | -4.6336 | -0.7490 | -0.6192 | H | 0.0615  | 3.4834  | -1.8329 | C | 2.0903   | 6.9600  | -2.8007 |
| C | -0.1280 | -6.6439 | -5.1338 | H | -0.5495 | -0.9343 | 0.4581  | C | 0.8175   | 6.2333  | -2.4380 |
| C | -0.2815 | -6.5095 | -3.6155 | H | 0.6495  | 0.3623  | 0.3207  | O | 0.6777   | 5.0298  | -2.6717 |
| C | -1.6352 | -6.0380 | -3.1114 | H | -5.3628 | 3.3757  | -0.0698 | N | -0.1495  | 6.9682  | -1.8307 |
| C | -1.8787 | -5.9878 | -1.7311 | H | -4.2857 | 4.4560  | 0.8139  | C | -1.4811  | 6.4034  | -1.6836 |
| C | -2.6640 | -5.6112 | -3.9597 | H | -4.3123 | 4.5213  | -0.9550 | C | -2.1068  | 6.1518  | -3.0668 |
| C | -3.0834 | -5.5203 | -1.2135 | H | -2.6861 | -0.1449 | 1.0868  | O | -2.0023  | 6.9843  | -3.9646 |
| C | -3.8784 | -5.1417 | -3.4585 | H | -1.5160 | -2.5969 | -0.5809 | N | -2.7597  | 4.9752  | -3.1726 |
| C | -4.0939 | -5.0876 | -2.0804 | H | -1.8817 | -3.1485 | -2.2147 | C | -3.2933  | 4.5092  | -4.4477 |
| O | -5.3062 | -4.6348 | -1.6398 | H | -2.4770 | -1.5832 | -1.6695 | C | -3.2804  | 2.9806  | -4.5022 |
| H | -0.2666 | -5.6830 | -5.6392 | H | -0.8737 | -3.5572 | -4.0396 | C | -1.8858  | 2.3434  | -4.3885 |
| H | -0.0498 | -7.4745 | -3.1462 | H | 0.8325  | -3.6097 | -4.4965 | C | -2.0019  | 0.8299  | -4.1899 |
| H | 0.4858  | -5.8171 | -3.2440 | C | 1.6155  | -2.7763 | 7.4350  | C | -0.9798  | 2.6808  | -5.5775 |
| H | -1.1044 | -6.3146 | -1.0427 | C | 0.8657  | -1.4534 | 7.6471  | C | 3.8163   | 1.9784  | -2.5518 |
| H | -2.5208 | -5.6315 | -5.0349 | C | 1.4619  | -0.2942 | 6.8677  | C | 3.1434   | 2.8234  | -3.4488 |
| H | -3.2341 | -5.4767 | -0.1378 | O | 1.3678  | -0.4762 | 5.5470  | C | 3.3665   | 2.6988  | -4.8158 |
| H | -4.6638 | -4.7994 | -4.1237 | O | 1.9480  | 0.6964  | 7.3819  | C | 4.2717   | 1.7467  | -5.2956 |
| H | -5.2533 | -4.3879 | -0.7023 | C | -8.5078 | 2.6397  | 3.8261  | C | 4.9532   | 0.9167  | -4.4040 |
| C | 5.0800  | -4.1794 | -5.4216 | C | -6.9792 | 2.7047  | 3.8062  | C | 4.7227   | 1.0221  | -3.0336 |
| C | 5.2581  | -5.0083 | -4.1709 | C | -6.3597 | 2.2689  | 2.4860  | C | 3.5078   | 2.0936  | -1.1061 |
| O | 6.2466  | -5.7153 | -3.9781 | O | -6.9332 | 2.4275  | 1.4059  | O | 2.8521   | 3.0394  | -0.6607 |
| C | 4.8375  | -2.6840 | -5.1640 | O | -5.1574 | 1.7674  | 2.6309  | C | 4.0816   | 1.0707  | -0.1197 |
| H | 5.9821  | -4.3219 | -6.0197 | H | -8.9167 | 3.2230  | 4.6556  | O | 5.3479   | 1.1054  | -0.0340 |
| H | 5.6652  | -2.2614 | -4.5947 | H | -8.9208 | 3.0173  | 2.8919  | O | 3.2934   | 0.3751  | 0.5476  |
| H | 3.9175  | -2.4855 | -4.6053 | H | -6.5305 | 2.1204  | 4.6134  | H | 2.9324   | 6.4247  | -2.3544 |
| H | 4.7560  | -2.1388 | -6.1091 | H | -6.6399 | 3.7387  | 3.9602  | H | 2.2135   | 6.9253  | -3.8866 |
| N | 4.2278  | -4.9320 | -3.2917 | C | -1.0427 | 1.9609  | 5.4310  | H | -1.4320  | 5.4854  | -1.0950 |
| C | 4.3554  | -5.5069 | -1.9684 | C | -0.9716 | 1.4274  | 3.9978  | H | -2.0983  | 7.1254  | -1.1423 |
| C | 3.0472  | -5.4319 | -1.1926 | C | 0.2980  | 1.8179  | 3.3123  | H | -3.9182  | 2.5939  | -3.6979 |
| C | 2.4397  | -4.0246 | -1.0541 | C | 0.4836  | 2.5375  | 2.1584  | H | -3.7562  | 2.6614  | -5.4390 |
| C | 1.1994  | -4.1031 | -0.1646 | N | 1.5453  | 1.4528  | 3.8090  | H | -1.3994  | 2.7502  | -3.4987 |
| C | 3.4414  | -2.9884 | -0.5284 | C | 2.4453  | 1.9290  | 2.9569  | H | 0.0019   | 2.2115  | -5.4529 |
| H | 3.5460  | -4.1989 | -3.4153 | N | 1.8457  | 2.6052  | 1.9514  | H | -1.4111  | 2.3194  | -6.5201 |
| H | 5.1513  | -4.9940 | -1.4174 | H | -0.1672 | 1.6719  | 6.0145  | H | -0.8175  | 3.7591  | -5.6681 |
| H | 3.2361  | -5.8317 | -0.1882 | H | -1.0642 | 0.3364  | 4.0048  | H | -2.5054  | 0.3570  | -5.0430 |
| H | 2.3054  | -6.0944 | -1.6586 | H | -1.8225 | 1.7951  | 3.4143  | H | -2.5786  | 0.5879  | -3.2919 |
| H | 2.0965  | -3.6872 | -2.0446 | H | -0.2178 | 3.0037  | 1.4879  | H | -1.0144  | 0.3739  | -4.0910 |
| H | 1.4718  | -4.3744 | 0.8620  | H | 3.5114  | 1.7758  | 3.0102  | H | -2.6944  | 4.9564  | -5.2462 |
| H | 0.6715  | -3.1532 | -0.1247 | H | 2.2919  | 2.8914  | 1.0707  | H | 2.4369   | 3.5538  | -3.0673 |
| H | 0.4877  | -4.8473 | -0.5352 | C | 5.2308  | 7.1840  | 3.1056  | H | 2.8293   | 3.3399  | -5.5084 |
| H | 4.3134  | -2.8860 | -1.1823 | C | 5.2680  | 5.8541  | 3.8674  | H | 4.4443   | 1.6521  | -6.3641 |
| H | 3.8042  | -3.2714 | 0.4663  | C | 5.7690  | 4.6366  | 3.0655  | H | 5.6616   | 0.1824  | -4.7729 |
| H | 2.9857  | -1.9985 | -0.4469 | C | 5.7738  | 3.3902  | 3.9633  | H | 5.2527   | 0.3784  | -2.3418 |
| C | 9.2543  | -5.2762 | -0.5894 | C | 4.9333  | 4.3960  | 1.8017  | C | -5.1244  | -3.2601 | 3.3670  |
| C | 7.8847  | -4.7459 | -1.0298 | H | 4.5225  | 7.1514  | 2.2719  | C | -3.7356  | -2.7100 | 3.6917  |
| C | 7.9153  | -3.2806 | -1.4071 | H | 4.2597  | 5.6267  | 4.2419  | O | -3.5544  | -1.5212 | 3.9443  |
| C | 7.7754  | -2.8693 | -2.7361 | H | 5.9016  | 5.9683  | 4.7569  | C | -6.0402  | -2.1987 | 2.7282  |
|   |         |         |         | H | 6.8049  | 4.8321  | 2.7517  | C | -5.6405  | -1.8990 | 1.2958  |

N -6.1923 -2.6760 0.3219  
O -4.8068 -1.0252 1.0320  
N -2.7303 -3.6227 3.7719  
C -1.3874 -3.1759 4.1046  
C -0.6994 -2.5242 2.8995  
O -1.0460 -2.7800 1.7415  
C -0.6531 -4.4908 4.4345  
C -1.2904 -5.4774 3.4429  
C -2.7623 -5.0309 3.3578  
N 0.3553 -1.7671 3.2433  
C 1.4781 -1.5077 2.3719  
C 2.7426 -2.1126 2.9899  
O 2.7056 -3.1332 3.6801  
N 3.8674 -1.4188 2.7066  
C 5.1802 -1.8788 3.1202  
C 5.5666 -1.5094 4.5581  
O 6.5471 -2.0354 5.0806  
C 6.2460 -1.2784 2.1929  
O 6.2567 0.1354 2.2679  
N 4.8229 -0.5449 5.1439  
C 5.2489 0.0925 6.3720  
H -7.0749 -2.5526 2.7536  
H -5.9413 -1.2667 3.2875  
H -5.0692 -4.1437 2.7261  
H -0.8700 -4.7786 5.4688  
H 0.4283 -4.3906 4.3152  
H -1.1942 -6.5212 3.7515  
H -0.8205 -5.3618 2.4635  
H -3.4041 -5.6163 4.0295  
H -3.1510 -5.1347 2.3395  
H -1.4194 -2.4750 4.9422  
H 1.6096 -0.4445 2.1888  
H 1.2907 -1.9927 1.4166  
H 7.2153 -1.6722 2.5176  
H 6.0553 -1.6128 1.1675  
H 5.9097 0.4824 1.4113  
H 5.2217 -2.9712 3.0647  
H 5.9720 0.8952 6.1767  
H 2.1068 8.0010 -2.4699  
H -4.3202 4.8745 -4.5806  
H -2.6126 4.2943 -2.4242  
H -0.0875 7.9704 -1.9259  
H 5.7336 -0.6566 7.0002  
H 4.3805 0.5073 6.8872  
H 4.0763 -0.1398 4.6014  
H 0.5402 -1.6068 4.2295  
H -7.0767 -3.1560 0.4926  
H -5.9831 -2.3914 -0.6312  
H 3.8070 -0.6787 1.9978  
H -5.5696 -3.5922 4.3133  
C -10.6014 -5.2530 1.5987  
C -9.7437 -4.4416 0.6455  
O -8.6664 -3.9618 1.0104  
C -11.2631 -4.3181 2.6199  
N -10.2653 -4.2219 -0.5826  
C -9.6141 -3.3720 -1.5667  
C -9.1130 6.8787 2.9589  
C -8.7493 5.6530 2.1316  
C -8.3153 5.9826 0.7034  
N -7.7835 4.9216 0.0332  
O -8.4657 7.0909 0.2022  
H -10.5001 -3.7453 3.1525  
H -11.8436 -4.8870 3.3515  
H -11.9365 -3.6105 2.1262  
H -11.3584 -5.8322 1.0577  
H -8.6934 -3.8312 -1.9429  
H -7.9481 5.0836 2.6116  
H -9.6047 4.9694 2.0656  
H -7.5547 4.0500 0.5033  
H -7.4106 5.0887 -0.8889  
H -9.8925 7.4607 2.4617  
H -9.4684 6.5847 3.9512  
H -8.2489 7.5374 3.0828  
H -9.9421 -5.9608 2.1087  
H -9.3542 -2.4082 -1.1210  
H -10.2960 -3.2070 -2.4012  
H -11.1392 -4.6628 -0.8208

## TC

C 11.4860 5.3364 -0.4198  
C 11.0226 4.1700 -1.3046  
C 9.8486 3.4330 -0.7327  
C 8.6108 3.2072 -1.2956  
N 9.9058 2.8543 0.5220  
C 8.7237 2.2900 0.7048  
N 7.9024 2.4764 -0.3668  
H 10.7001 6.0938 -0.3312  
H 11.8598 3.4704 -1.4326  
H 10.7654 4.5337 -2.3070  
H 8.1821 3.4953 -2.2434  
H 8.4046 1.7220 1.5690  
H 6.9525 2.1045 -0.4426  
C -9.3717 2.2975 -4.4629  
C -7.9296 2.6260 -4.0433  
C -7.1922 1.4359 -3.4699  
C -6.9370 0.3088 -4.2647  
C -6.7559 1.4092 -2.1405  
C -6.2716 -0.8008 -3.7590  
C -6.0785 0.3063 -1.6170  
C -5.8222 -0.8035 -2.4319  
O -5.1372 -1.8948 -2.0013  
H -9.9521 1.9446 -3.6042  
H -7.9393 3.4345 -3.3034  
H -7.3845 3.0145 -4.9139  
H -7.2539 0.3060 -5.3051  
H -6.9486 2.2551 -1.4865  
H -6.0519 -1.6602 -4.3841  
H -5.7373 0.3125 -0.5882  
H -4.8205 -1.7539 -1.0712  
C -0.1893 -6.5264 -5.2599  
C -0.2046 -5.4041 -4.2114  
C -1.5312 -5.2908 -3.4960  
C -1.7073 -5.7973 -2.2056  
C -2.6383 -4.6950 -4.1196  
C -2.9392 -5.7194 -1.5561  
C -3.8743 -4.6076 -3.4873  
C -4.0273 -5.1297 -2.2005  
O -5.2712 -5.0590 -1.6258  
H -0.9582 -6.3602 -6.0216  
H 0.5914 -5.5764 -3.4786  
H 0.0296 -4.4518 -4.7000  
H -0.8681 -6.2578 -1.6931  
H -2.5256 -4.2787 -5.1175  
H -3.0497 -6.1110 -0.5476  
H -4.7190 -4.1171 -3.9558  
H -5.1987 -5.2758 -0.6864  
C 5.0419 -4.1184 -5.6054  
C 5.2500 -4.9964 -4.3899  
O 6.2482 -5.6992 -4.2351  
C 4.7402 -2.6489 -5.2665  
H 5.9561 -4.1925 -6.1990  
H 5.4866 -2.2474 -4.5769  
H 3.7579 -2.5158 -4.8000  
H 4.7447 -2.0356 -6.1723  
N 4.2360 -4.9438 -3.4934  
C 4.3695 -5.5024 -2.1645  
C 3.0643 -5.3569 -1.3872  
C 2.5102 -3.9223 -1.2947  
C 1.2333 -3.9237 -0.4569  
C 3.5357 -2.9235 -0.7436  
H 3.5302 -4.2351 -3.6188  
H 5.1833 -5.0001 -1.6315  
H 3.2336 -5.7298 -0.3693  
H 2.2997 -6.0067 -1.8348  
H 2.2197 -3.5836 -2.3029  
H 1.4333 -4.2537 0.5677  
H 0.7979 -2.9270 -0.4084  
H 0.4742 -4.5899 -0.8774  
H 4.4326 -2.8597 -1.3688  
H 3.8541 -3.2157 0.2637  
H 3.1094 -1.9191 -0.6790  
C 9.2966 -5.3552 -0.8802  
C 7.9206 -4.8513 -1.3408

C 7.9440 -3.3921 -1.7403  
C 7.9096 -2.9999 -3.0841  
C 8.0458 -2.3975 -0.7594  
C 7.9792 -1.6468 -3.4296  
C 8.1010 -1.0467 -1.0968  
C 8.0729 -0.6660 -2.4403  
H 9.6635 -4.7765 -0.0264  
H 7.2064 -4.9872 -0.5179  
H 7.5599 -5.4553 -2.1779  
H 7.8226 -3.7622 -3.8521  
H 8.0830 -2.6900 0.2852  
H 7.9695 -1.3607 -4.4786  
H 8.1626 -0.2940 -0.3198  
H 8.1306 0.3855 -2.7037  
C -3.2369 0.9817 0.9954  
C -1.9955 0.8810 0.4256  
C -1.6016 1.9326 -0.4462  
N -0.3883 1.9005 -1.0372  
N -2.4250 2.9793 -0.6838  
C -3.6231 2.9842 -0.0805  
N -4.0658 2.0304 0.7474  
S 1.2294 0.2850 -2.5680  
C 0.5235 0.7282 -0.9327  
C -4.5312 4.1458 -0.3693  
N -0.1973 -0.4529 -0.5164  
C -0.6991 -1.1900 -1.6205  
C -1.8096 -2.1553 -1.3733  
C -0.0432 -0.9621 -2.7741  
C -0.1660 -1.6383 -4.0979  
C -1.0252 -0.2361 0.6688  
H 1.3439 0.9484 -0.2503  
H -0.0846 2.7006 -1.5850  
H -1.5288 -1.1590 0.9478  
H -0.3597 0.0259 1.4936  
H -4.8147 4.1437 -1.4261  
H -5.4385 4.0870 0.2281  
H -4.0114 5.0891 -0.1816  
H -3.6032 0.2096 1.6654  
H -1.5582 -2.8409 -0.5588  
H -2.0324 -2.7382 -2.2639  
H -2.7189 -1.6258 -1.0825  
H -0.9710 -2.3756 -4.0797  
H 0.7641 -2.1587 -4.3673  
C 1.8498 -2.9182 7.3415  
C 1.0779 -1.6115 7.5770  
C 1.6850 -0.4326 6.8380  
O 1.5392 -0.5489 5.5132  
O 2.2265 0.5135 7.3781  
C -8.2767 2.6840 4.0381  
C -8.5052 2.0232 2.6676  
C -7.3391 2.2827 1.7327  
O -7.4117 3.0813 0.7976  
O -6.2594 1.6079 2.0475  
H -9.1035 2.4542 4.7166  
H -7.3500 2.3152 4.4855  
H -9.4100 2.4108 2.1936  
H -8.6116 0.9412 2.7986  
C -0.7900 1.8870 5.4801  
C -0.7472 1.4314 4.0202  
C 0.5258 1.8104 3.3333  
C 0.7095 2.5487 2.1902  
N 1.7702 1.3936 3.7944  
C 2.6667 1.8575 2.9332  
N 2.0682 2.5749 1.9554  
H 0.0782 1.5372 6.0395  
H -0.8836 0.3456 3.9649  
H -1.5864 1.8635 3.4648  
H 0.0088 3.0430 1.5381  
H 3.7289 1.6720 2.9623  
H 2.5037 2.8747 1.0752  
C 5.4991 7.0791 3.1274  
C 5.5130 5.7412 3.8750  
C 6.0206 4.5314 3.0666  
C 6.0065 3.2736 3.9478  
C 5.2040 4.3122 1.7866  
H 4.8045 7.0623 2.2820  
H 4.4966 5.5161 4.2286

H 6.1312 5.8403 4.7771  
H 7.0620 4.7265 2.7714  
H 4.9939 3.0771 4.3211  
H 6.3417 2.3837 3.4055  
H 6.6541 3.3975 4.8230  
H 4.1357 4.2512 2.0204  
H 5.4978 3.3848 1.2881  
H 5.3369 5.1262 1.0679  
H -0.3809 -0.9238 -4.9012  
H -8.2070 3.7720 3.9546  
H 11.7096 4.9711 0.5859  
H 12.3828 5.8162 -0.8275  
H -9.8758 3.1761 -4.8795  
H -9.3899 1.5080 -5.2209  
H -0.7965 2.9801 5.5446  
H -1.6919 1.5133 5.9759  
H 6.4932 7.3217 2.7337  
H 5.1939 7.8962 3.7898  
H 0.0446 -1.7242 7.2264  
H 1.0517 -1.3556 8.6387  
H 1.9835 -3.1088 6.2732  
H 1.3227 -3.7653 7.7905  
H 2.8468 -2.8618 7.7883  
H 9.2501 -6.4080 -0.5825  
H 10.0325 -5.2606 -1.6854  
H 4.6565 -6.5544 -2.2539  
H 0.7819 -6.5840 -5.7624  
H -0.3902 -7.4962 -4.7936  
H 4.2286 -4.5367 -6.2131  
H 1.7984 0.2947 4.9771  
H -5.4261 1.8769 1.4580  
C 2.2397 7.0039 -2.7179  
C 1.0706 6.1537 -2.2501  
O 0.9998 4.9439 -2.4605  
N 0.0888 6.8330 -1.5796  
C -1.2106 6.1974 -1.4476  
C -1.8793 6.0752 -2.8271  
O -1.7552 6.9684 -3.6640  
N -2.5922 4.9468 -3.0137  
C -3.2049 4.6482 -4.3020  
C -3.6113 3.1775 -4.3909  
C -2.4865 2.1651 -4.1062  
C -3.0185 0.7393 -4.2627  
C -1.2351 2.4073 -4.9562  
C 4.1016 2.0663 -2.5535  
C 3.4707 2.9438 -3.4514  
C 3.7519 2.8528 -4.8104  
C 4.6574 1.8958 -5.2786  
C 5.2857 1.0239 -4.3863  
C 5.0074 1.1022 -3.0250  
C 3.7337 2.1342 -1.1246  
O 2.9918 3.0169 -0.6824  
C 4.2809 1.0819 -0.1540  
O 5.5391 1.1003 -0.0124  
O 3.4540 0.3634 0.4418  
H 3.1636 6.4349 -2.5995  
H 2.1051 7.2208 -3.7825  
H -1.0960 5.2229 -0.9726  
H -1.8361 6.8208 -0.8013  
H -4.4415 2.9795 -3.6999  
H -4.0094 3.0009 -5.3994  
H -2.1906 2.2770 -3.0589  
H -0.4763 1.6500 -4.7392  
H -1.4700 2.3633 -6.0277  
H -0.7836 3.3812 -4.7430  
H -3.2560 0.5179 -5.3111  
H -3.9317 0.5970 -3.6817  
H -2.2846 0.0110 -3.9119  
H -2.4910 4.9092 -5.0901  
H 2.7471 3.6609 -3.0742  
H 3.2552 3.5200 -5.5083  
H 4.8707 1.8271 -6.3418  
H 5.9903 0.2811 -4.7448  
H 5.4969 0.4283 -2.3324  
C -4.9748 -3.2458 3.4012  
C -3.5716 -2.6716 3.6104  
O -3.3411 -1.4636 3.5404

C -5.8955 -2.3095 2.5969  
C -5.5981 -2.3709 1.1095  
N -6.3707 -3.1871 0.3664  
O -4.6553 -1.7285 0.6135  
N -2.6162 -3.5633 3.9805  
C -1.2653 -3.0979 4.2707  
C -0.5242 -2.7033 2.9874  
O -0.8002 -3.2197 1.9037  
C -0.5832 -4.3397 4.8776  
C -1.2501 -5.4908 4.1106  
C -2.7064 -5.0289 3.9384  
N 0.4629 -1.8128 3.2062  
C 1.5726 -1.6128 2.3017  
C 2.8451 -2.2046 2.9162  
O 2.8167 -3.2023 3.6373  
N 3.9738 -1.5245 2.6016  
C 5.2871 -2.0053 2.9944  
C 5.6886 -1.6916 4.4419  
O 6.6421 -2.2780 4.9488  
C 6.3566 -1.3754 2.0897  
O 6.4052 0.0308 2.2510  
N 4.9997 -0.6984 5.0498  
C 5.4960 -0.0727 6.2596  
H -6.9384 -2.5917 2.7718  
H -5.7407 -1.2790 2.9240  
H -4.9324 -4.2298 2.9261  
H -0.8054 -4.3971 5.9485  
H 0.5003 -4.3063 4.7448  
H -1.1790 -6.4522 4.6251  
H -0.7852 -5.5834 3.1268  
H -3.3498 -5.4011 4.7473  
H -3.1236 -5.3702 2.9863  
H -1.3016 -2.2485 4.9576  
H 1.7131 -0.5552 2.0815  
H 1.3472 -2.1171 1.3643  
H 7.3200 -1.8126 2.3755  
H 6.1430 -1.6400 1.0481  
H 6.0707 0.4331 1.4155  
H 5.3248 -3.0950 2.8981  
H 6.2299 0.7112 6.0319  
H 2.3181 7.9474 -2.1727  
H -4.0811 5.2914 -4.4536  
H -2.5158 4.2139 -2.3082  
H 0.0586 7.8285 -1.7514  
H 5.9876 -0.8373 6.8625  
H 4.6619 0.3611 6.8147  
H 4.2884 -0.2348 4.5062  
H 0.6448 -1.5342 4.1665  
H -7.2188 -3.6337 0.7075  
H -6.1819 -3.2335 -0.6310  
H 3.9129 -0.7917 1.8881  
H -5.4045 -3.4074 4.3980  
C -11.0634 -5.0964 1.5051  
C -10.0039 -4.5224 0.5863  
O -8.8115 -4.5555 0.9036  
C -11.1394 -4.2172 2.7576  
N -10.4506 -3.9193 -0.5370  
C -9.5624 -3.2114 -1.4428  
C -8.8474 6.9449 3.2628  
H -10.1567 -4.1614 3.2313  
H -11.8526 -4.6211 3.4817  
H -11.4533 -3.1997 2.5038  
H -12.0391 -5.1603 1.0104  
H -8.7803 -3.8793 -1.8154  
H -8.5042 6.7254 4.2785  
H -8.8083 8.0241 3.0997  
H -9.8939 6.6341 3.1813  
H -10.7569 -6.1113 1.7740  
H -9.0735 -2.3679 -0.9455  
H -10.1398 -2.8372 -2.2883  
H -11.4419 -3.9075 -0.7159  
C -7.9818 6.2356 2.2220  
C -8.3033 6.6920 0.7983  
N -8.1643 5.7273 -0.1482  
O -8.6386 7.8443 0.5406  
H -6.9223 6.4659 2.3961  
H -8.0722 5.1482 2.2904

H -7.9454 4.7652 0.0895  
H -8.3266 5.9892 -1.1082

TCH<sup>+</sup>

C 11.5049 5.3282 -0.3546  
C 11.0289 4.1798 -1.2562  
C 9.8532 3.4389 -0.6920  
C 8.6168 3.2180 -1.2598  
N 9.9082 2.8469 0.5566  
C 8.7265 2.2796 0.7310  
N 7.9070 2.4769 -0.3401  
H 10.7248 6.0894 -0.2488  
H 11.8611 3.4774 -1.4009  
H 10.7689 4.5619 -2.2509  
H 8.1899 3.5156 -2.2055  
H 8.4059 1.7028 1.5889  
H 6.9572 2.1070 -0.4212  
C -9.3509 2.3864 -4.4786  
C -7.9584 2.7553 -3.9416  
C -7.1964 1.5628 -3.4067  
C -6.8220 0.5173 -4.2632  
C -6.8646 1.4490 -2.0517  
C -6.1386 -0.5968 -3.7925  
C -6.1719 0.3390 -1.5624  
C -5.7920 -0.6862 -2.4378  
O -5.0877 -1.7791 -2.0409  
H -9.9628 1.9401 -3.6879  
H -8.0584 3.5041 -3.1477  
H -7.3824 3.2345 -4.7446  
H -7.0593 0.5825 -5.3226  
H -7.1517 2.2249 -1.3468  
H -5.8260 -1.3915 -4.4622  
H -5.9304 0.2743 -0.5074  
H -4.8053 -1.6829 -1.0931  
C -0.1922 -6.4571 -5.3295  
C -0.2062 -5.3536 -4.2620  
C -1.5409 -5.2332 -3.5631  
C -1.7445 -5.7687 -2.2884  
C -2.6280 -4.6007 -4.1859  
C -2.9835 -5.6828 -1.6535  
C -3.8701 -4.5029 -3.5672  
C -4.0511 -5.0543 -2.2961  
O -5.3003 -4.9722 -1.7362  
H -0.9472 -6.2655 -6.0991  
H 0.5772 -5.5496 -3.5217  
H 0.0500 -4.3986 -4.7334  
H -0.9216 -6.2587 -1.7765  
H -2.4941 -4.1623 -5.1718  
H -3.1157 -6.0980 -0.6571  
H -4.6980 -3.9826 -4.0334  
H -5.2475 -5.2223 -0.8037  
C 5.0469 -4.0615 -5.6401  
C 5.2456 -4.9497 -4.4308  
O 6.2340 -5.6679 -4.2842  
C 4.7353 -2.5957 -5.2949  
H 5.9677 -4.1274 -6.2244  
H 5.4701 -2.1964 -4.5917  
H 3.7452 -2.4692 -4.8428  
H 4.7509 -1.9758 -6.1961  
N 4.2344 -4.8906 -3.5316  
C 4.3614 -5.4739 -2.2133  
C 3.0527 -5.3534 -1.4394  
C 2.4902 -3.9248 -1.3194  
C 1.2191 -3.9506 -0.4738  
C 3.5120 -2.9282 -0.7574  
H 3.5387 -4.1705 -3.6465  
H 5.1694 -4.9790 -1.6647  
H 3.2216 -5.7459 -0.4289  
H 2.2939 -5.9988 -1.9025  
H 2.1919 -3.5719 -2.3205  
H 1.4267 -4.3043 0.5412  
H 0.7832 -2.9563 -0.3975  
H 0.4587 -4.6084 -0.9053  
H 4.4059 -2.8500 -1.3851  
H 3.8367 -3.2330 0.2442  
H 3.0812 -1.9269 -0.6763

|   |         |         |         |   |         |         |         |   |          |         |         |
|---|---------|---------|---------|---|---------|---------|---------|---|----------|---------|---------|
| C | 9.2855  | -5.3524 | -0.9150 | H | 4.8262  | 7.0540  | 2.3409  | C | -3.5792  | -2.6856 | 3.5560  |
| C | 7.9101  | -4.8441 | -1.3730 | H | 4.4932  | 5.4891  | 4.2698  | O | -3.3189  | -1.4851 | 3.4576  |
| C | 7.9353  | -3.3823 | -1.7628 | H | 6.1259  | 5.7970  | 4.8328  | C | -5.9024  | -2.2964 | 2.5392  |
| C | 7.9004  | -2.9815 | -3.1040 | H | 7.0626  | 4.6998  | 2.8190  | C | -5.5938  | -2.3523 | 1.0547  |
| C | 8.0394  | -2.3942 | -0.7755 | H | 4.9806  | 3.0443  | 4.3436  | N | -6.3849  | -3.1301 | 0.2919  |
| C | 7.9722  | -1.6263 | -3.4410 | H | 6.3321  | 2.3552  | 3.4301  | O | -4.6249  | -1.7361 | 0.5729  |
| C | 8.0972  | -1.0414 | -1.1045 | H | 6.6386  | 3.3555  | 4.8580  | N | -2.6444  | -3.5852 | 3.9606  |
| C | 8.0689  | -0.6520 | -2.4456 | H | 4.1372  | 4.2451  | 2.0525  | C | -1.2901  | -3.1360 | 4.2628  |
| H | 9.6522  | -4.7797 | -0.0571 | H | 5.4981  | 3.3789  | 1.3168  | C | -0.5296  | -2.7524 | 2.9879  |
| H | 7.1953  | -4.9848 | -0.5516 | H | 5.3463  | 5.1232  | 1.1125  | O | -0.7959  | -3.2685 | 1.9015  |
| H | 7.5489  | -5.4417 | -2.2145 | H | -0.3138 | -0.8750 | -4.8955 | C | -0.6290  | -4.3837 | 4.8821  |
| H | 7.8123  | -3.7387 | -3.8769 | H | -8.2880 | 3.7702  | 3.8364  | C | -1.3119  | -5.5306 | 4.1238  |
| H | 8.0772  | -2.6937 | 0.2671  | H | 11.7319 | 4.9449  | 0.6436  | C | -2.7614  | -5.0496 | 3.9564  |
| H | 7.9629  | -1.3336 | -4.4882 | H | 12.4024 | 5.8086  | -0.7599 | N | 0.4612   | -1.8671 | 3.2137  |
| H | 8.1616  | -0.2933 | -0.3230 | H | -9.8763 | 3.2676  | -4.8622 | C | 1.5722   | -1.6663 | 2.3114  |
| H | 8.1293  | 0.4009  | -2.7022 | H | -9.2786 | 1.6572  | -5.2919 | C | 2.8485   | -2.2491 | 2.9249  |
| C | -3.2228 | 0.8688  | 1.0273  | H | -0.7993 | 2.9560  | 5.5483  | O | 2.8281   | -3.2412 | 3.6530  |
| C | -1.9859 | 0.8097  | 0.4582  | H | -1.7019 | 1.4922  | 5.9741  | N | 3.9726   | -1.5669 | 2.5976  |
| C | -1.6148 | 1.8807  | -0.4086 | H | 6.5125  | 7.2979  | 2.8094  | C | 5.2905   | -2.0383 | 2.9870  |
| N | -0.4024 | 1.8828  | -0.9853 | H | 5.2081  | 7.8689  | 3.8608  | C | 5.6883   | -1.7299 | 4.4365  |
| N | -2.4642 | 2.9115  | -0.6513 | H | 0.0277  | -1.7553 | 7.2411  | O | 6.6466   | -2.3107 | 4.9404  |
| C | -3.6621 | 2.8969  | -0.0698 | H | 1.0625  | -1.4124 | 8.6392  | C | 6.3530   | -1.3910 | 2.0867  |
| N | -4.0551 | 1.9117  | 0.7581  | H | 1.9420  | -3.1429 | 6.2361  | O | 6.3883   | 0.0140  | 2.2627  |
| S | 1.2386  | 0.3199  | -2.5405 | H | 1.2962  | -3.8148 | 7.7534  | N | 4.9900   | -0.7463 | 5.0492  |
| C | 0.5346  | 0.7183  | -0.8978 | H | 2.8281  | -2.9252 | 7.7415  | C | 5.4815   | -0.1219 | 6.2612  |
| C | -4.6132 | 4.0188  | -0.3471 | H | 9.2379  | -6.4072 | -0.6245 | H | -6.9460  | -2.5818 | 2.7035  |
| N | -0.1686 | -0.4756 | -0.4995 | H | 10.0220 | -5.2529 | -1.7191 | H | -5.7621  | -1.2627 | 2.8646  |
| C | -0.6645 | -1.2024 | -1.6149 | H | 4.6555  | -6.5217 | -2.3236 | H | -4.9597  | -4.2256 | 2.8768  |
| C | -1.7641 | -2.1836 | -1.3840 | H | 0.7854  | -6.5207 | -5.8189 | H | -0.8547  | -4.4287 | 5.9528  |
| C | -0.0126 | -0.9452 | -2.7643 | H | -0.4147 | -7.4320 | -4.8841 | H | 0.4552   | -4.3676 | 4.7532  |
| C | -0.1223 | -1.6027 | -4.0986 | H | 4.2427  | -4.4791 | -6.2603 | H | -1.2509  | -6.4903 | 4.6430  |
| C | -0.9937 | -0.2890 | 0.6905  | H | 1.7863  | 0.2510  | 4.9772  | H | -0.8524  | -5.6336 | 3.1383  |
| H | 1.3480  | 0.9499  | -0.2112 | H | -5.0629 | 1.8319  | 1.2371  | H | -3.4006  | -5.3903 | 4.7826  |
| H | -0.1207 | 2.6834  | -1.5450 | C | 2.2695  | 7.0431  | -2.6620 | H | -3.1977  | -5.4070 | 3.0193  |
| H | -1.4807 | -1.2229 | 0.9616  | C | 1.1027  | 6.1838  | -2.2030 | H | -1.3220  | -2.2842 | 4.9474  |
| H | -0.3328 | -0.0182 | 1.5158  | O | 1.0270  | 4.9784  | -2.4367 | H | 1.7099   | -0.6084 | 2.0887  |
| H | -4.8038 | 4.0755  | -1.4221 | N | 0.1238  | 6.8489  | -1.5135 | H | 1.3512   | -2.1752 | 1.3755  |
| H | -5.5617 | 3.8703  | 0.1721  | C | -1.1767 | 6.2135  | -1.3986 | H | 7.3208   | -1.8226 | 2.3659  |
| H | -4.1557 | 4.9680  | -0.0522 | C | -1.8358 | 6.1107  | -2.7849 | H | 6.1398   | -1.6466 | 1.0427  |
| H | -3.5978 | 0.1005  | 1.6946  | O | -1.6714 | 6.9949  | -3.6228 | H | 6.0625   | 0.4219  | 1.4269  |
| H | -1.5153 | -2.8670 | -0.5675 | N | -2.5884 | 5.0077  | -2.9780 | H | 5.3387   | -3.1268 | 2.8833  |
| H | -1.9609 | -2.7685 | -2.2791 | C | -3.1777 | 4.7174  | -4.2810 | H | 6.2142   | 0.6643  | 6.0371  |
| H | -2.6888 | -1.6721 | -1.1105 | C | -3.5502 | 3.2393  | -4.3953 | H | 2.3667   | 7.9629  | -2.0803 |
| H | -0.9375 | -2.3284 | -4.1026 | C | -2.4052 | 2.2509  | -4.1092 | H | -4.0657  | 5.3431  | -4.4352 |
| H | 0.8052  | -2.1317 | -4.3588 | C | -2.9092 | 0.8144  | -4.2554 | H | -2.5384  | 4.2698  | -2.2795 |
| C | 1.8242  | -2.9661 | 7.3085  | C | -1.1606 | 2.5151  | -4.9627 | H | 0.0970   | 7.8489  | -1.6568 |
| C | 1.0682  | -1.6562 | 7.5745  | C | 4.1167  | 2.0857  | -2.5358 | H | 5.9736   | -0.8860 | 6.8645  |
| C | 1.6714  | -0.4747 | 6.8377  | C | 3.4964  | 2.9775  | -3.4273 | H | 4.6452   | 0.3091  | 6.8150  |
| O | 1.5235  | -0.5904 | 5.5124  | C | 3.7921  | 2.9068  | -4.7844 | H | 4.2768   | -0.2845 | 4.5068  |
| O | 2.2102  | 0.4734  | 7.3766  | C | 4.7014  | 1.9556  | -5.2574 | H | 0.6385   | -1.5845 | 4.1739  |
| C | -8.2771 | 2.6950  | 4.0281  | C | 5.3189  | 1.0695  | -4.3716 | H | -7.2446  | -3.5648 | 0.6212  |
| C | -8.4352 | 1.8873  | 2.7283  | C | 5.0266  | 1.1279  | -3.0123 | H | -6.1898  | -3.1615 | -0.7046 |
| C | -7.2485 | 2.1190  | 1.7932  | C | 3.7328  | 2.1318  | -1.1103 | H | 3.9056   | -0.8325 | 1.8869  |
| O | -7.3290 | 3.0196  | 0.9205  | O | 2.9778  | 3.0026  | -0.6655 | H | -5.4223  | -3.3920 | 4.3450  |
| O | -6.2151 | 1.3999  | 1.9979  | C | 4.2800  | 1.0737  | -0.1454 | C | -11.0678 | -5.0585 | 1.4227  |
| H | -9.0899 | 2.4732  | 4.7274  | O | 5.5372  | 1.0984  | 0.0003  | C | -10.0077 | -4.4764 | 0.5099  |
| H | -7.3298 | 2.4447  | 4.5150  | O | 3.4540  | 0.3475  | 0.4430  | O | -8.8145  | -4.5153 | 0.8249  |
| H | -9.3547 | 2.1793  | 2.2121  | H | 3.1909  | 6.4631  | -2.5873 | C | -11.1566 | -4.1864 | 2.6796  |
| H | -8.4879 | 0.8201  | 2.9663  | H | 2.1115  | 7.3050  | -3.7132 | N | -10.4539 | -3.8657 | -0.6095 |
| C | -0.7966 | 1.8630  | 5.4827  | H | -1.0648 | 5.2315  | -0.9375 | C | -9.5656  | -3.1483 | -1.5077 |
| C | -0.7500 | 1.4096  | 4.0221  | H | -1.8063 | 6.8262  | -0.7465 | C | -8.8334  | 6.9642  | 3.2890  |
| C | 0.5257  | 1.7874  | 3.3391  | H | -4.3854 | 3.0133  | -3.7187 | H | -10.1773 | -4.1269 | 3.1599  |
| C | 0.7171  | 2.5411  | 2.2074  | H | -3.9317 | 3.0665  | -5.4107 | H | -11.8717 | -4.5990 | 3.3968  |
| N | 1.7660  | 1.3531  | 3.7943  | H | -2.1096 | 2.3737  | -3.0627 | H | -11.4748 | -3.1693 | 2.4298  |
| C | 2.6676  | 1.8227  | 2.9419  | H | -0.3869 | 1.7725  | -4.7466 | H | -12.0405 | -5.1258 | 0.9226  |
| N | 2.0766  | 2.5599  | 1.9745  | H | -1.3977 | 2.4639  | -6.0332 | H | -8.7555  | -3.8016 | -1.8436 |
| H | 0.0685  | 1.5088  | 6.0442  | H | -0.7271 | 3.4980  | -4.7531 | H | -8.4090  | 6.8968  | 4.2958  |
| H | -0.8881 | 0.3239  | 3.9640  | H | -3.1578 | 0.5859  | -5.2996 | H | -8.9286  | 8.0159  | 3.0111  |
| H | -1.5872 | 1.8452  | 3.4664  | H | -3.8115 | 0.6549  | -3.6619 | H | -9.8406  | 6.5345  | 3.3176  |
| H | 0.0229  | 3.0572  | 1.5653  | H | -2.1564 | 0.1020  | -3.9138 | H | -10.7571 | -6.0731 | 1.6882  |
| H | 3.7282  | 1.6280  | 2.9700  | H | -2.4562 | 5.0067  | -5.0514 | H | -9.1157  | -2.2775 | -1.0201 |
| H | 2.5144  | 2.8661  | 1.0975  | H | 2.7697  | 3.6901  | -3.0477 | H | -10.1321 | -2.8132 | -2.3768 |
| C | 5.5138  | 7.0572  | 3.1923  | H | 3.3045  | 3.5858  | -5.4773 | H | -11.4466 | -3.8372 | -0.7791 |
| C | 5.5135  | 5.7114  | 3.9255  | H | 4.9263  | 1.9029  | -6.3190 | C | -7.9607  | 6.2446  | 2.2669  |
| C | 6.0191  | 4.5068  | 3.1082  | H | 6.0264  | 0.3312  | -4.7337 | C | -8.4789  | 6.4980  | 0.8483  |
| C | 5.9960  | 3.2412  | 3.9779  | H | 5.5089  | 0.4434  | -2.3249 | N | -8.5553  | 5.3965  | 0.0619  |
| C | 5.2067  | 4.3030  | 1.8230  | C | -4.9909 | -3.2389 | 3.3477  | O | -8.8076  | 7.6222  | 0.4739  |

H -6.9393 6.6444 2.3065  
H -7.8862 5.1724 2.4565  
H -8.2334 4.4782 0.3752  
H -8.8439 5.5361 -0.8945

**R-Mandelate  
Model E**

**AP**

C 11.1550 5.6121 0.0247  
C 10.7220 4.4540 -0.8839  
C 9.6267 3.6291 -0.2794  
C 8.3796 3.3364 -0.7884  
N 9.7798 3.0316 0.9578  
C 8.6444 2.3894 1.1806  
N 7.7623 2.5457 0.1554  
H 10.3283 6.3133 0.1807  
H 11.5929 3.8136 -1.0801  
H 10.3914 4.8367 -1.8573  
H 7.8889 3.6161 -1.7086  
H 8.4091 1.7762 2.0403  
H 6.8454 2.0845 0.0876  
C -9.5140 2.1268 -4.5873  
C -8.4963 2.9610 -3.7896  
C -7.4456 2.0851 -3.1489  
C -6.3483 1.6242 -3.8899  
C -7.5806 1.6336 -1.8311  
C -5.4403 0.7181 -3.3503  
C -6.6791 0.7302 -1.2725  
C -5.6124 0.2524 -2.0414  
O -4.7331 -0.6735 -1.5749  
H -10.0172 1.4082 -3.9323  
H -9.0217 3.5370 -3.0186  
H -8.0228 3.6900 -4.4584  
H -6.2060 1.9760 -4.9091  
H -8.4007 2.0018 -1.2200  
H -4.5928 0.3597 -3.9251  
H -6.7751 0.4426 -0.2329  
H -4.7766 -0.7463 -0.5825  
C -0.0579 -6.3899 -5.5150  
C -0.1439 -6.0244 -4.0279  
C -1.5117 -5.6031 -3.5186  
C -1.7976 -5.6796 -2.1486  
C -2.5162 -5.0983 -4.3554  
C -3.0216 -5.2685 -1.6271  
C -3.7497 -4.6852 -3.8515  
C -4.0108 -4.7693 -2.4816  
O -5.2439 -4.3817 -2.0410  
H -0.2685 -5.5285 -6.1574  
H 0.1980 -6.8772 -3.4295  
H 0.5776 -5.2216 -3.8181  
H -1.0470 -6.0725 -1.4698  
H -2.3427 -5.0243 -5.4242  
H -3.2058 -5.3309 -0.5575  
H -4.5196 -4.2924 -4.5068  
H -5.2419 -4.2872 -1.0748  
C 5.1052 -3.8195 -5.6545  
C 5.3295 -4.6620 -4.4242  
O 6.3708 -5.2878 -4.2333  
C 6.0599 -2.6254 -5.7441  
H 5.2577 -4.4727 -6.5213  
H 7.0971 -2.9667 -5.7657  
H 5.9393 -1.9663 -4.8820  
H 5.8666 -2.0466 -6.6522  
N 4.2840 -4.6849 -3.5608  
C 4.4029 -5.3537 -2.2836  
C 3.0864 -5.3641 -1.5173  
C 2.4831 -3.9774 -1.2312  
C 1.2518 -4.1381 -0.3357  
C 3.5114 -3.0182 -0.6186  
H 3.5342 -4.0234 -3.6882  
H 5.1824 -4.8717 -1.6850  
H 3.2676 -5.8671 -0.5593  
H 2.3482 -5.9728 -2.0564

H 2.1356 -3.5483 -2.1854  
H 1.5470 -4.4028 0.6857  
H 0.6570 -3.2269 -0.2747  
H 0.5898 -4.9226 -0.7142  
H 4.3422 -2.8101 -1.2999  
H 3.9297 -3.4455 0.2982  
H 3.0731 -2.0551 -0.3500  
C 9.2955 -5.1129 -0.8870  
C 7.9352 -4.4698 -1.1836  
C 8.0470 -2.9965 -1.5046  
C 7.9330 -2.5391 -2.8216  
C 8.2956 -2.0605 -0.4936  
C 8.0475 -1.1776 -3.1152  
C 8.3931 -0.7006 -0.7770  
C 8.2685 -0.2524 -2.0938  
H 9.7877 -4.6250 -0.0395  
H 7.2814 -4.6015 -0.3109  
H 7.4659 -4.9903 -2.0233  
H 7.7573 -3.2640 -3.6085  
H 8.4025 -2.3967 0.5318  
H 7.9710 -0.8399 -4.1457  
H 8.5511 0.0032 0.0294  
H 8.3495 0.8081 -2.3103  
C -2.6610 0.7173 0.6360  
C -1.4596 0.9686 0.0108  
C -1.3655 2.1953 -0.7127  
N -0.2270 2.6415 -1.2549  
N -2.4750 2.9567 -0.8830  
C -3.6029 2.6016 -0.2652  
N -3.7330 1.5326 0.5336  
S 1.7864 -0.6827 -3.0740  
C 1.4323 -0.1127 -1.5218  
C -4.8037 3.4700 -0.4989  
N 0.2244 -0.4699 -1.1179  
C -0.4870 -1.2796 -2.0150  
C -1.8215 -1.8315 -1.6511  
C 0.2298 -1.4819 -3.1609  
C -0.1766 -2.2235 -4.3935  
C -0.3066 0.0294 0.1834  
H 2.1209 0.4103 -0.8563  
H -0.2123 3.5817 -1.6477  
H -0.6096 -0.8434 0.7636  
H 0.5350 0.5143 0.6801  
H -5.1552 3.3321 -1.5269  
H -5.6134 3.1952 0.1717  
H -4.5439 4.5244 -0.3756  
H -2.7957 -0.1660 1.2547  
H -1.8062 -2.2310 -0.6324  
H -2.0817 -2.6461 -2.3262  
H -2.6092 -1.0782 -1.7176  
H -1.0132 -2.8899 -4.1799  
H 0.6446 -2.8311 -4.7863  
C 1.6096 -3.2104 7.2554  
C 0.7805 -1.9195 7.2544  
C 1.5017 -0.7640 6.5439  
O 1.6887 -0.9321 5.2680  
O 1.8545 0.2322 7.1846  
C -8.6084 2.2181 3.9443  
C -7.0871 2.3324 3.9328  
C -6.4928 1.9812 2.5826  
O -7.0927 2.1970 1.5270  
O -5.2866 1.4768 2.6623  
H -9.0408 2.7382 4.8036  
H -9.0312 2.6325 3.0316  
H -6.6142 1.7172 4.7021  
H -6.7768 3.3666 4.1363  
C -1.1329 1.5841 5.5193  
C -1.0597 1.2340 4.0268  
C 0.1988 1.7200 3.3848  
C 0.4364 2.6171 2.3670  
N 1.4502 1.2935 3.7888  
C 2.3700 1.9083 3.0115  
N 1.7970 2.7261 2.1349  
H -0.2704 1.1991 6.0689  
H -1.1458 0.1486 3.9027  
H -1.9131 1.6683 3.4948  
H -0.2817 3.1886 1.7970

H 3.4280 1.7134 3.0902  
H 0.6978 2.3290 -0.9564  
C 5.0461 7.0430 3.5030  
C 5.0721 5.6606 4.1658  
C 5.7316 4.5445 3.3336  
C 5.7516 3.2313 4.1303  
C 5.0352 4.3452 1.9823  
H 4.4372 7.0425 2.5937  
H 4.0437 5.3529 4.4011  
H 5.5950 5.7341 5.1288  
H 6.7739 4.8352 3.1349  
H 4.7389 2.9513 4.4415  
H 6.1592 2.4028 3.5413  
H 6.3550 3.3258 5.0397  
H 3.9648 4.1526 2.1145  
H 5.4731 3.4923 1.4594  
H 5.1425 5.2210 1.3337  
H -0.4857 -1.5275 -5.1813  
H -8.9142 1.1678 3.9998  
H 11.4477 5.2227 1.0031  
H 11.9997 6.1645 -0.4023  
H -10.2768 2.7607 -5.0523  
H -9.0116 1.5590 -5.3770  
H -1.1518 2.6701 5.6583  
H -2.0413 1.1657 5.9647  
H 6.0562 7.3662 3.2246  
H 4.6288 7.7966 4.1796  
H -0.1718 -2.0977 6.7360  
H 0.5507 -1.6025 8.2753  
H 1.8869 -3.4845 6.2329  
H 1.0576 -4.0426 7.7061  
H 2.5360 -3.0724 7.8224  
H 9.1868 -6.1769 -0.6501  
H 9.9597 -5.0229 -1.7527  
H 4.7478 -6.3759 -2.4678  
H 0.9474 -6.7434 -5.7607  
H -0.7713 -7.1796 -5.7709  
H 4.0660 -3.4707 -5.7009  
H 1.6368 0.5290 4.4879  
H -4.8317 1.4006 1.7452  
C 1.9128 7.0976 -2.4112  
C 0.6615 6.3263 -2.0737  
O 0.5362 5.1356 -2.3721  
N -0.3182 7.0151 -1.4320  
C -1.6478 6.4376 -1.3563  
C -2.2203 6.2324 -2.7704  
O -2.0297 7.0712 -3.6489  
N -2.9327 5.0941 -2.9091  
C -3.4248 4.6475 -4.2024  
C -2.8409 3.2771 -4.5764  
C -1.3056 3.2163 -4.6155  
C -0.8294 1.7735 -4.8203  
C -0.7093 4.1673 -5.6583  
C 3.8676 2.0541 -2.2418  
C 3.0120 2.7130 -3.1374  
C 3.1007 2.4621 -4.5069  
C 4.0426 1.5575 -5.0023  
C 4.9046 0.9117 -4.1156  
C 4.8191 1.1541 -2.7435  
C 3.7590 2.3557 -0.7507  
O 2.4273 2.7271 -0.4597  
C 4.2302 1.1562 0.1059  
O 5.4772 1.0497 0.2650  
O 3.3603 0.3709 0.5622  
H 2.7812 6.4807 -2.1718  
H 1.9219 7.2869 -3.4891  
H -1.6139 5.4978 -0.8009  
H -2.2911 7.1312 -0.8085  
H -3.2081 2.5376 -3.8538  
H -3.2516 2.9831 -5.5532  
H -0.9344 3.5437 -3.6426  
H 0.3834 4.0981 -5.6600  
H -1.0642 3.9251 -6.6685  
H -0.9673 5.2073 -5.4404  
H -1.1622 1.3790 -5.7897  
H -1.2207 1.1162 -4.0356  
H 0.2629 1.7129 -4.7865

H -3.1603 5.4172 -4.9296  
H 2.2823 3.4218 -2.7619  
H 2.4316 2.9803 -5.1878  
H 4.1098 1.3657 -6.0695  
H 5.6554 0.2196 -4.4825  
H 5.4977 0.6476 -2.0658  
C -5.1186 -3.5843 3.1566  
C -3.7628 -2.9444 3.4951  
O -3.6737 -1.7554 3.7943  
C -6.1130 -2.5528 2.5920  
C -5.7408 -2.1140 1.1890  
N -6.3066 -2.7930 0.1532  
O -4.9224 -1.2066 0.9947  
N -2.6905 -3.7782 3.5191  
C -1.3741 -3.2790 3.8999  
C -0.6607 -2.5954 2.7267  
O -1.0247 -2.7797 1.5534  
C -0.6042 -4.5686 4.2524  
C -1.1664 -5.5699 3.2313  
C -2.6512 -5.1841 3.0994  
N 0.4164 -1.8885 3.0955  
C 1.5370 -1.6315 2.2172  
C 2.7619 -2.3918 2.7343  
O 2.6642 -3.5367 3.1841  
N 3.9122 -1.6907 2.6468  
C 5.1869 -2.2107 3.1060  
C 5.6244 -1.6784 4.4821  
O 6.7290 -1.9900 4.9250  
C 6.3157 -1.8794 2.1191  
O 6.6231 -0.5033 2.0986  
N 4.7802 -0.8330 5.1126  
C 5.1910 -0.2208 6.3621  
H -7.1194 -2.9810 2.5891  
H -6.0795 -1.6608 3.2205  
H -5.0065 -4.4221 2.4630  
H -0.8475 -4.8694 5.2766  
H 0.4762 -4.4343 4.1658  
H -1.0373 -6.6122 3.5329  
H -0.6658 -5.4261 2.2705  
H -3.2887 -5.7987 3.7486  
H -3.0047 -5.2997 2.0687  
H -1.4622 -2.5852 4.7386  
H 1.7517 -0.5680 2.1477  
H 1.2948 -2.0026 1.2240  
H 7.2007 -2.4184 2.4689  
H 6.0451 -2.2529 1.1223  
H 6.1203 -0.0520 1.3842  
H 5.0834 -3.2969 3.1906  
H 6.0135 0.4805 6.1873  
H 1.9848 8.0507 -1.8822  
H -4.5201 4.5748 -4.1772  
H -2.8136 4.3799 -2.1850  
H -0.2600 8.0217 -1.4618  
H 5.5428 -0.9748 7.0749  
H 4.3316 0.3050 6.7810  
H 3.7937 -0.8150 4.8715  
H 0.6611 -1.7469 4.0905  
H -7.1618 -3.3340 0.2919  
H -6.1275 -2.4131 -0.7709  
H 3.8985 -0.8217 2.1119  
H -5.5254 -4.0021 4.0857  
C -10.6239 -5.5813 1.2384  
C -9.7527 -4.7234 0.3416  
O -8.6640 -4.2922 0.7341  
C -11.2367 -4.7087 2.3416  
N -10.2694 -4.4090 -0.8673  
C -9.6032 -3.4972 -1.7822  
C -9.2897 6.4878 3.3180  
C -8.9730 5.2892 2.4326  
C -8.7079 5.6472 0.9699  
N -8.2151 4.6113 0.2318  
O -8.9522 6.7530 0.5010  
H -10.4459 -4.2082 2.9056  
H -11.8275 -5.3135 3.0349  
H -11.8904 -3.9403 1.9174  
H -11.4082 -6.0875 0.6644  
H -8.6370 -3.9000 -2.1035

H -8.1067 4.7412 2.8150  
H -9.8078 4.5782 2.4471  
H -7.8854 3.7536 0.6657  
H -7.9459 4.8032 -0.7212  
H -10.1359 7.0498 2.9158  
H -9.5305 6.1636 4.3349  
H -8.4402 7.1748 3.3670  
H -9.9836 -6.3506 1.6790  
H -9.4253 -2.5288 -1.3048  
H -10.2337 -3.3506 -2.6595  
H -11.1656 -4.7911 -1.1233  
H 4.4399 3.1863 -0.5182  
H 2.3148 2.8404 0.5347

### APH<sup>+</sup>

C 11.2962 5.5216 -0.4931  
C 10.8329 4.3092 -1.3114  
C 9.7028 3.5683 -0.6631  
C 8.4517 3.2837 -1.1658  
N 9.8266 3.0434 0.6098  
C 8.6703 2.4508 0.8603  
N 7.8016 2.5715 -0.1819  
H 10.4938 6.2617 -0.4052  
H 11.6831 3.6258 -1.4409  
H 10.5300 4.6225 -2.3180  
H 7.9790 3.5208 -2.1070  
H 8.4100 1.8966 1.7522  
H 6.8794 2.1223 -0.2346  
C -9.4841 2.0562 -4.5917  
C -8.4275 2.7434 -3.7122  
C -7.4271 1.7528 -3.1654  
C -6.5385 1.0953 -4.0286  
C -7.3852 1.4216 -1.8076  
C -5.6565 0.1287 -3.5608  
C -6.5058 0.4551 -1.3180  
C -5.6429 -0.2019 -2.2003  
O -4.7817 -1.1803 -1.8053  
H -10.0327 1.3040 -4.0156  
H -8.9193 3.2638 -2.8826  
H -7.9139 3.5146 -4.3016  
H -6.5355 1.3470 -5.0865  
H -8.0282 1.9389 -1.1010  
H -4.9649 -0.3762 -4.2266  
H -6.4677 0.2561 -0.2531  
H -4.6798 -1.2232 -0.8151  
C -0.1642 -6.6449 -5.0869  
C -0.3000 -6.3689 -3.5862  
C -1.6695 -5.9153 -3.1076  
C -1.9095 -5.7779 -1.7325  
C -2.7236 -5.6085 -3.9769  
C -3.1438 -5.3647 -1.2396  
C -3.9683 -5.1958 -3.5006  
C -4.1885 -5.0807 -2.1273  
O -5.4356 -4.7129 -1.7082  
H -0.3464 -5.7429 -5.6811  
H -0.0213 -7.2737 -3.0312  
H 0.4445 -5.6157 -3.2939  
H -1.1134 -5.9985 -1.0281  
H -2.5819 -5.6925 -5.0491  
H -3.2914 -5.2507 -0.1684  
H -4.7785 -4.9607 -4.1823  
H -5.4326 -4.5636 -0.7501  
C 5.0324 -4.1674 -5.4628  
C 5.2499 -4.9260 -4.1785  
O 6.2671 -5.5854 -3.9711  
C 6.1621 -3.1850 -5.7794  
H 4.9751 -4.9176 -6.2615  
H 7.1190 -3.7111 -5.8112  
H 6.2307 -2.4091 -5.0141  
H 5.9959 -2.7027 -6.7470  
N 4.2244 -4.8534 -3.2931  
C 4.3566 -5.4679 -1.9898  
C 3.0581 -5.4621 -1.1966  
C 2.4473 -4.0745 -0.9391  
C 1.2675 -4.2181 0.0262  
C 3.4862 -3.0713 -0.4217

H 3.5078 -4.1579 -3.4295  
H 5.1461 -4.9636 -1.4242  
H 3.2675 -5.9346 -0.2288  
H 2.3123 -6.0938 -1.6975  
H 2.0461 -3.6969 -1.8933  
H 1.6231 -4.4037 1.0457  
H 0.6383 -3.3297 0.0616  
H 0.6233 -5.0540 -0.2655  
H 4.2790 -2.8775 -1.1511  
H 3.9563 -3.4496 0.4916  
H 3.0422 -2.1050 -0.1750  
C 9.2716 -5.2107 -0.6772  
C 7.9106 -4.5752 -0.9868  
C 8.0199 -3.1250 -1.4011  
C 7.8722 -2.7445 -2.7392  
C 8.2983 -2.1330 -0.4537  
C 7.9782 -1.4015 -3.1126  
C 8.3847 -0.7910 -0.8155  
C 8.2219 -0.4191 -2.1516  
H 9.7847 -4.6740 0.1275  
H 7.2754 -4.6467 -0.0937  
H 7.4159 -5.1418 -1.7803  
H 7.6795 -3.5125 -3.4800  
H 8.4338 -2.4131 0.5851  
H 7.8788 -1.1217 -4.1585  
H 8.5612 -0.0409 -0.0556  
H 8.2957 0.6269 -2.4315  
C -2.7508 0.7813 0.6335  
C -1.5275 1.0290 0.0606  
C -1.4093 2.2341 -0.7098  
N -0.2662 2.6716 -1.2293  
N -2.5173 2.9903 -0.9523  
C -3.6745 2.6597 -0.4011  
N -3.8151 1.5951 0.4179  
S 1.7260 -0.9266 -2.8479  
C 1.3560 -0.1737 -1.3797  
C -4.8734 3.4928 -0.7088  
N 0.1620 -0.5188 -0.9236  
C -0.5191 -1.4654 -1.7038  
C -1.8465 -1.9871 -1.2899  
C 0.2032 -1.7892 -2.8171  
C -0.1864 -2.6918 -3.9431  
C -0.3749 0.1027 0.3213  
H 2.0402 0.4375 -0.7909  
H -0.2429 3.5688 -1.7179  
H -0.6794 -0.7128 0.9779  
H 0.4597 0.6345 0.7788  
H -5.6677 3.3262 0.0212  
H -4.5925 4.5465 -0.7483  
H -5.2614 3.2065 -1.6927  
H -2.9391 -0.0753 1.2737  
H -1.8660 -2.2211 -0.2229  
H -2.0757 -2.8993 -1.8391  
H -2.6360 -1.2712 -1.5170  
H -0.9578 -3.3942 -3.6241  
H 0.6673 -3.2721 -4.3058  
C 1.7306 -2.6659 7.4252  
C 0.9135 -1.3693 7.3323  
C 1.6393 -0.2671 6.5449  
O 1.8102 -0.5121 5.2786  
O 2.0140 0.7596 7.1217  
C -8.4555 2.6893 3.9029  
C -7.2329 1.8303 3.5844  
C -6.7279 1.9288 2.1438  
O -7.1297 2.8584 1.4142  
O -5.8558 1.0430 1.8093  
H -8.7298 2.5922 4.9588  
H -8.2579 3.7406 3.6972  
H -7.4012 0.7706 3.8076  
H -6.3916 2.1235 4.2268  
C -0.9680 2.0463 5.4162  
C -0.9217 1.5855 3.9548  
C 0.3219 2.0318 3.2603  
C 0.5368 2.8833 2.2002  
N 1.5809 1.6161 3.6517  
C 2.4823 2.1937 2.8261  
N 1.8919 2.9767 1.9291



H -0.0952 1.7016 5.9764  
H -1.0052 0.4939 3.9090  
H -1.7844 1.9810 3.4070  
H -0.1981 3.4481 1.6442  
H 3.5415 2.0032 2.8908  
H 0.6718 2.3507 -0.9719  
C 5.2586 7.2682 2.9652  
C 5.2865 5.9274 3.7089  
C 5.8862 4.7471 2.9208  
C 5.9051 3.4845 3.7952  
C 5.1327 4.4881 1.6097  
H 4.6089 7.2276 2.0856  
H 4.2629 5.6586 4.0054  
H 5.8515 6.0467 4.6429  
H 6.9272 4.9963 2.6665  
H 4.8964 3.2434 4.1486  
H 6.2809 2.6130 3.2488  
H 6.5344 3.6219 4.6812  
H 4.0595 4.3605 1.7892  
H 5.5071 3.5774 1.1362  
H 5.2599 5.3089 0.8961  
H -0.5839 -2.1143 -4.7851  
H -9.3214 2.3901 3.3014  
H 11.5658 5.2033 0.5172  
H 12.1645 6.0079 -0.9525  
H -10.2064 2.7783 -4.9873  
H -9.0172 1.5461 -5.4401  
H -0.9844 3.1396 5.4731  
H -1.8671 1.6639 5.9104  
H 6.2615 7.5509 2.6234  
H 4.8883 8.0701 3.6131  
H -0.0409 -1.5761 6.8286  
H 0.6867 -0.9816 8.3292  
H 2.0034 -3.0164 6.4251  
H 1.1695 -3.4565 7.9353  
H 2.6589 -2.4968 7.9803  
H 9.1596 -6.2562 -0.3702  
H 9.9194 -5.1826 -1.5596  
H 4.7038 -6.4941 -2.1422  
H 0.8459 -6.9948 -5.3174  
H -0.8720 -7.4113 -5.4184  
H 4.0664 -3.6474 -5.4543  
H 1.7778 0.8924 4.3912  
H -4.7918 1.3829 0.9826  
C 2.0423 6.9849 -2.8976  
C 0.7990 6.2444 -2.4503  
O 0.6647 5.0274 -2.6041  
N -0.1738 7.0059 -1.8785  
C -1.5114 6.4556 -1.7479  
C -2.0956 6.1403 -3.1370  
O -1.9023 6.9013 -4.0815  
N -2.8186 5.0012 -3.1952  
C -3.3548 4.5042 -4.4535  
C -3.2925 2.9753 -4.5016  
C -1.8776 2.3850 -4.3948  
C -1.9431 0.8707 -4.1724  
C -1.0057 2.7317 -5.6055  
C 3.7617 1.8676 -2.4601  
C 2.8888 2.4727 -3.3770  
C 2.8989 2.0822 -4.7162  
C 3.7694 1.0828 -5.1582  
C 4.6447 0.4856 -4.2508  
C 4.6463 0.8760 -2.9104  
C 3.7382 2.3224 -1.0033  
O 2.4278 2.7438 -0.6788  
C 4.2430 1.2037 -0.0635  
O 5.4955 1.0890 0.0285  
O 3.3896 0.4789 0.5094  
H 2.9143 6.3545 -2.7179  
H 1.9672 7.1668 -3.9745  
H -1.4890 5.5715 -1.1070  
H -2.1429 7.2040 -1.2618  
H -3.9141 2.5674 -3.6955  
H -3.7604 2.6392 -5.4365  
H -1.3938 2.8214 -3.5169  
H -0.0199 2.2657 -5.5105  
H -1.4612 2.3723 -6.5370

H -0.8513 3.8109 -5.6949  
H -2.4117 0.3643 -5.0258  
H -2.5300 0.6225 -3.2821  
H -0.9394 0.4547 -4.0452  
H -2.7818 4.9652 -5.2621  
H 2.2119 3.2517 -3.0411  
H 2.2275 2.5693 -5.4172  
H 3.7705 0.7793 -6.2015  
H 5.3357 -0.2855 -4.5779  
H 5.3391 0.4118 -2.2171  
C -5.0601 -3.2042 3.4496  
C -3.6673 -2.5987 3.6904  
O -3.5171 -1.3853 3.8297  
C -5.9498 -2.2498 2.6317  
C -5.5626 -2.1858 1.1690  
N -6.3910 -2.7860 0.2834  
O -4.5246 -1.6198 0.7847  
N -2.6304 -3.4653 3.8267  
C -1.3005 -2.9651 4.1580  
C -0.5888 -2.3811 2.9342  
O -0.9501 -2.6686 1.7813  
C -0.5497 -4.2376 4.6019  
C -1.1513 -5.3089 3.6795  
C -2.6317 -4.9075 3.5515  
N 0.4840 -1.6362 3.2333  
C 1.5868 -1.4412 2.3176  
C 2.8256 -2.1596 2.8621  
O 2.7429 -3.2692 3.3943  
N 3.9696 -1.4629 2.6970  
C 5.2594 -1.9495 3.1486  
C 5.7201 -1.3627 4.4935  
O 6.8316 -1.6589 4.9300  
C 6.3575 -1.6222 2.1287  
O 6.6041 -0.2337 2.0505  
N 4.8949 -0.4796 5.0936  
C 5.3411 0.2047 6.2908  
H -6.9957 -2.5555 2.7192  
H -5.8254 -1.2328 3.0144  
H -5.0066 -4.1878 2.9761  
H -0.7779 -4.4475 5.6520  
H 0.5313 -4.1314 4.4872  
H -1.0320 -6.3251 4.0631  
H -0.6725 -5.2530 2.6986  
H -3.2591 -5.4400 4.2782  
H -3.0191 -5.1172 2.5488  
H -1.3663 -2.2089 4.9433  
H 1.7978 -0.3846 2.1699  
H 1.3251 -1.8807 1.3570  
H 7.2672 -2.1162 2.4812  
H 6.0814 -2.0403 1.1524  
H 6.1392 0.1447 1.2711  
H 5.1816 -3.0344 3.2689  
H 6.1839 0.8629 6.0565  
H 2.1680 7.9419 -2.3859  
H -4.3964 4.8304 -4.5765  
H -2.7488 4.3512 -2.4107  
H -0.1126 8.0019 -2.0291  
H 5.6765 -0.5063 7.0544  
H 4.5045 0.7866 6.6808  
H 3.9053 -0.4591 4.8661  
H 0.7462 -1.4146 4.2099  
H -7.2905 -3.1827 0.5583  
H -6.1990 -2.6393 -0.7015  
H 3.9420 -0.6316 2.1056  
H -5.5147 -3.3533 4.4361  
C -10.7599 -5.2454 1.6820  
C -9.8447 -4.4921 0.7412  
O -8.7314 -4.1106 1.1154  
C -11.2047 -4.2867 2.7914  
N -10.3442 -4.1945 -0.4777  
C -9.6132 -3.3711 -1.4241  
C -9.0849 6.9190 3.0081  
C -8.6986 5.7749 2.0818  
C -8.4478 6.1936 0.6342  
N -8.0051 5.1627 -0.1427  
O -8.6381 7.3289 0.2125  
H -10.3300 -3.8740 3.2987

H -11.8260 -4.8008 3.5299  
H -11.7839 -3.4539 2.3806  
H -11.6243 -5.6644 1.1547  
H -8.7054 -3.8764 -1.7718  
H -7.7921 5.2683 2.4283  
H -9.4728 4.9986 2.0760  
H -7.7462 4.2844 0.2950  
H -7.7027 5.3733 -1.0807  
H -9.9797 7.4310 2.6449  
H -9.2785 6.5476 4.0192  
H -8.2881 7.6669 3.0627  
H -10.1910 -6.0775 2.1069  
H -9.3196 -2.4235 -0.9636  
H -10.2514 -3.1628 -2.2832  
H -11.2534 -4.5469 -0.7302  
H 4.4377 3.1628 -0.8906  
H 2.3654 2.9480 0.3059

## IP

C 11.5227 5.2065 -0.5049  
C 11.0975 3.9557 -1.2848  
C 9.8858 3.3011 -0.6962  
C 8.6434 3.1135 -1.2614  
N 9.8974 2.7928 0.5900  
C 8.6825 2.3047 0.7858  
N 7.8826 2.4821 -0.3018  
H 10.7384 5.9702 -0.5392  
H 11.9292 3.2390 -1.2892  
H 10.8980 4.2117 -2.3325  
H 8.2440 3.3709 -2.2309  
H 8.3268 1.7881 1.6675  
H 6.9441 2.0768 -0.4095  
C -9.3570 2.3325 -4.5551  
C -8.1653 2.7930 -3.7018  
C -7.3001 1.6469 -3.2267  
C -6.4697 0.9547 -4.1192  
C -7.3084 1.2345 -1.8896  
C -5.6735 -0.1057 -3.6944  
C -6.5047 0.1846 -1.4432  
C -5.6781 -0.4893 -2.3474  
O -4.8700 -1.5292 -1.9835  
H -10.0005 1.6568 -3.9823  
H -8.5380 3.3477 -2.8329  
H -7.5595 3.4984 -4.2860  
H -6.4339 1.2571 -5.1637  
H -7.9200 1.7402 -1.1453  
H -5.0222 -0.6317 -4.3843  
H -6.5049 -0.0443 -0.3826  
H -4.7424 -1.5638 -1.0010  
C -0.2951 -6.6376 -5.0352  
C -0.3297 -6.3040 -3.5395  
C -1.6793 -5.8695 -2.9977  
C -1.9752 -6.0414 -1.6390  
C -2.6617 -5.2723 -3.8004  
C -3.2004 -5.6547 -1.1012  
C -3.8919 -4.8775 -3.2792  
C -4.1730 -5.0834 -1.9275  
O -5.4198 -4.7514 -1.4824  
H -0.4920 -5.7558 -5.6532  
H 0.0049 -7.1786 -2.9691  
H 0.4143 -5.5222 -3.3311  
H -1.2355 -6.4976 -0.9869  
H -2.4733 -5.1130 -4.8571  
H -3.4052 -5.8058 -0.0442  
H -4.6425 -4.4026 -3.9006  
H -5.4407 -4.7397 -0.5148  
C 4.9707 -4.3137 -5.4289  
C 5.1893 -5.0731 -4.1427  
O 6.2581 -5.6162 -3.8668  
C 5.6122 -2.9198 -5.3803  
H 5.4196 -4.8987 -6.2373  
H 6.6937 -3.0030 -5.2524  
H 5.2169 -2.3307 -4.5481  
H 5.4157 -2.3727 -6.3072  
N 4.1271 -5.0754 -3.3002  
C 4.2637 -5.5817 -1.9502

|   |         |         |         |   |         |         |         |   |          |         |         |
|---|---------|---------|---------|---|---------|---------|---------|---|----------|---------|---------|
| C | 2.9563  | -5.4877 | -1.1761 | C | 0.6196  | 2.5733  | 2.1039  | H | -3.6886  | 2.8357  | -5.5280 |
| C | 2.3571  | -4.0747 | -1.0581 | N | 1.7092  | 1.5296  | 3.7649  | H | -1.5243  | 2.5707  | -3.3853 |
| C | 1.1231  | -4.1367 | -0.1584 | C | 2.5923  | 1.9442  | 2.8636  | H | 0.0406   | 2.1602  | -5.2643 |
| C | 3.3761  | -3.0435 | -0.5551 | N | 1.9742  | 2.5923  | 1.8513  | H | -1.2338  | 2.5595  | -6.4295 |
| H | 3.3293  | -4.4986 | -3.5168 | H | 0.0500  | 1.7943  | 6.0053  | H | -0.6176  | 3.7985  | -5.3195 |
| H | 5.0504  | -5.0269 | -1.4292 | H | -0.9422 | 0.4763  | 4.0268  | H | -2.5900  | 0.4877  | -5.3481 |
| H | 3.1450  | -5.8685 | -0.1647 | H | -1.6541 | 1.9565  | 3.4405  | H | -2.8565  | 0.5077  | -3.5999 |
| H | 2.2106  | -6.1560 | -1.6267 | H | -0.0837 | 2.9957  | 1.4055  | H | -1.2234  | 0.2726  | -4.2410 |
| H | 2.0135  | -3.7506 | -2.0544 | H | 3.6567  | 1.7711  | 2.8902  | H | -2.5197  | 5.0274  | -5.2117 |
| H | 1.4066  | -4.3845 | 0.8708  | H | 2.3695  | 2.8120  | 0.9316  | H | 2.1886   | 3.1300  | -3.3094 |
| H | 0.5886  | -3.1903 | -0.1240 | C | 5.5448  | 7.1402  | 2.9576  | H | 2.2719   | 2.5017  | -5.6811 |
| H | 0.4111  | -4.8920 | -0.5058 | C | 5.4926  | 5.8200  | 3.7352  | H | 4.0064   | 0.9186  | -6.5057 |
| H | 4.2341  | -2.9443 | -1.2276 | C | 5.9683  | 4.5713  | 2.9673  | H | 5.6775   | -0.0028 | -4.9079 |
| H | 3.7581  | -3.3304 | 0.4308  | C | 5.9214  | 3.3413  | 3.8865  | H | 5.6090   | 0.6347  | -2.5249 |
| H | 2.9346  | -2.0482 | -0.4589 | C | 5.1479  | 4.3287  | 1.6931  | C | -5.0732  | -3.0258 | 3.4973  |
| C | 9.1865  | -5.4629 | -0.6470 | H | 4.8668  | 7.1313  | 2.0983  | C | -3.6583  | -2.4614 | 3.6485  |
| C | 7.8486  | -4.7186 | -0.7529 | H | 4.4628  | 5.6426  | 4.0769  | O | -3.4449  | -1.2513 | 3.7018  |
| C | 8.0132  | -3.2646 | -1.1377 | H | 6.0993  | 5.9172  | 4.6451  | C | -5.9807  | -2.1508 | 2.6167  |
| C | 7.6542  | -2.8226 | -2.4158 | H | 7.0140  | 4.7294  | 2.6653  | C | -5.6540  | -2.2673 | 1.1432  |
| C | 8.5538  | -2.3359 | -0.2382 | H | 4.9058  | 3.1879  | 4.2715  | N | -6.5767  | -2.8442 | 0.3477  |
| C | 7.8204  | -1.4846 | -2.7803 | H | 6.2257  | 2.4261  | 3.3686  | O | -4.5740  | -1.8603 | 0.6780  |
| C | 8.7192  | -0.9994 | -0.5968 | H | 6.5784  | 3.4731  | 4.7533  | N | -2.6600  | -3.3683 | 3.8409  |
| C | 8.3493  | -0.5677 | -1.8727 | H | 4.0795  | 4.2726  | 1.9292  | C | -1.3101  | -2.9063 | 4.1284  |
| H | 9.8412  | -5.0002 | 0.0988  | H | 5.4456  | 3.3894  | 1.2188  | C | -0.6059  | -2.3827 | 2.8742  |
| H | 7.3225  | -4.7854 | 0.2088  | H | 5.2858  | 5.1284  | 0.9584  | O | -0.9392  | -2.7542 | 1.7449  |
| H | 7.2281  | -5.2200 | -1.5005 | H | -0.3245 | -2.1043 | -4.9655 | C | -0.5902  | -4.1907 | 4.5904  |
| H | 7.2649  | -3.5468 | -3.1223 | H | -8.7040 | 2.0493  | 4.3765  | C | -1.2472  | -5.2655 | 3.7111  |
| H | 8.8372  | -2.6628 | 0.7589  | H | 11.6890 | 4.9487  | 0.5443  | C | -2.7160  | -4.8181 | 3.6100  |
| H | 7.5426  | -1.1594 | -3.7793 | H | 12.4437 | 5.6408  | -0.9099 | N | 0.4403   | -1.5787 | 3.1413  |
| H | 9.1268  | -0.2885 | 0.1135  | H | -9.9627 | 3.1819  | -4.8892 | C | 1.5483   | -1.3826 | 2.2318  |
| H | 8.4797  | 0.4735  | -2.1463 | H | -9.0142 | 1.7893  | -5.4420 | C | 2.8147   | -1.9891 | 2.8461  |
| C | -3.0392 | 0.7072  | 0.5892  | H | -0.8283 | 3.2055  | 5.4319  | O | 2.7698   | -3.0078 | 3.5367  |
| C | -1.8451 | 0.9721  | 0.0043  | H | -1.7215 | 1.7741  | 5.9717  | N | 3.9495   | -1.3041 | 2.5711  |
| C | -1.6707 | 2.2318  | -0.7117 | H | 6.5551  | 7.3358  | 2.5795  | C | 5.2521   | -1.7991 | 2.9885  |
| N | -0.4910 | 2.5521  | -1.1393 | H | 5.2577  | 7.9830  | 3.5952  | C | 5.6534   | -1.4677 | 4.4349  |
| N | -2.8038 | 3.0453  | -0.8783 | H | -0.0481 | -1.4594 | 7.2597  | O | 6.6083   | -2.0544 | 4.9397  |
| C | -3.9273 | 2.7160  | -0.2894 | H | 0.9495  | -1.0334 | 8.6626  | C | 6.3369   | -1.2199 | 2.0707  |
| N | -4.0766 | 1.5904  | 0.4583  | H | 1.8451  | -2.9397 | 6.4045  | O | 6.3343   | 0.1948  | 2.1295  |
| S | 1.5343  | -0.4919 | -3.0021 | H | 1.2104  | -3.4782 | 7.9769  | N | 4.9667   | -0.4798 | 5.0530  |
| C | 1.0145  | 0.2155  | -1.5491 | H | 2.7441  | -2.5958 | 7.8813  | C | 5.4279   | 0.0891  | 6.3083  |
| C | -5.1221 | 3.6129  | -0.3996 | H | 9.0335  | -6.5092 | -0.3618 | H | -7.0259  | -2.4258 | 2.7836  |
| N | -0.0497 | -0.3946 | -1.0543 | H | 9.7109  | -5.4446 | -1.6076 | H | -5.8535  | -1.0942 | 2.8723  |
| C | -0.5423 | -1.4594 | -1.8244 | H | 4.6048  | -6.6207 | -2.0032 | H | -5.0633  | -4.0561 | 3.1324  |
| C | -1.7781 | -2.1853 | -1.4192 | H | 0.6901  | -7.0202 | -5.3179 | H | -0.8018  | -4.3660 | 5.6505  |
| C | 0.2205  | -1.6511 | -2.9392 | H | -1.0429 | -7.3956 | -5.2881 | H | 0.4914   | -4.1204 | 4.4532  |
| C | 0.0078  | -2.6198 | -4.0575 | H | 3.8991  | -4.2249 | -5.6465 | H | -1.1500  | -6.2748 | 4.1185  |
| C | -0.6685 | 0.0757  | 0.2145  | H | 1.7449  | 0.4558  | 4.9509  | H | -0.7939  | -5.2472 | 2.7171  |
| H | 1.4966  | 1.0636  | -1.0795 | H | -4.9953 | 1.3641  | 0.9178  | H | -3.3398  | -5.3086 | 4.3689  |
| H | -0.4768 | 3.4582  | -1.6043 | C | 2.3108  | 6.9298  | -2.8986 | H | -3.1359  | -5.0416 | 2.6241  |
| H | -0.9357 | -0.8104 | 0.7878  | C | 1.2072  | 6.1873  | -2.1833 | H | -1.3328  | -2.1268 | 4.8943  |
| H | 0.1223  | 0.6103  | 0.7380  | O | 1.2468  | 4.9694  | -1.9782 | H | 1.7001   | -0.3300 | 2.0000  |
| H | -6.0066 | 3.0418  | -0.6838 | N | 0.1398  | 6.9472  | -1.8091 | H | 1.3220   | -1.9053 | 1.3038  |
| H | -5.3395 | 4.0819  | 0.5649  | C | -1.1559 | 6.3026  | -1.6625 | H | 7.2989   | -1.6111 | 2.4167  |
| H | -4.9305 | 4.3976  | -1.1311 | C | -1.7071 | 6.0044  | -3.0697 | H | 6.1712   | -1.5655 | 1.0438  |
| H | -3.2484 | -0.1821 | 1.1725  | O | -1.3241 | 6.6870  | -4.0241 | H | 6.0451   | 0.5124  | 1.2398  |
| H | -1.7701 | -2.4404 | -0.3577 | N | -2.6012 | 5.0039  | -3.1491 | H | 5.2633   | -2.9916 | 2.9238  |
| H | -1.8729 | -3.1093 | -1.9875 | C | -3.1589 | 4.6017  | -4.4363 | H | 6.1949   | 0.8559  | 6.1411  |
| H | -2.6617 | -1.5786 | -1.6280 | C | -3.2584 | 3.0761  | -4.5457 | H | 2.4220   | 7.9554  | -2.5377 |
| H | -0.7586 | -3.3464 | -3.7867 | C | -1.9284 | 2.3250  | -4.3706 | H | -4.1569  | 5.0418  | -4.5647 |
| H | 0.9257  | -3.1652 | -4.3017 | C | -2.1636 | 0.8117  | -4.3897 | H | -2.7459  | 4.3960  | -2.3322 |
| C | 1.7376  | -2.6712 | 7.4592  | C | -0.8776 | 2.7388  | -5.4066 | H | 0.0786   | 7.8312  | -2.2991 |
| C | 0.9828  | -1.3433 | 7.6156  | C | 3.9015  | 1.9344  | -2.7439 | H | 5.8681   | -0.7100 | 6.9064  |
| C | 1.6163  | -0.2107 | 6.8282  | C | 2.9623  | 2.4498  | -3.6477 | H | 4.5812   | 0.5309  | 6.8365  |
| O | 1.4909  | -0.3819 | 5.5075  | C | 3.0050  | 2.0880  | -4.9957 | H | 4.2368   | -0.0194 | 4.5321  |
| O | 2.1629  | 0.7516  | 7.3346  | C | 3.9758  | 1.2010  | -5.4573 | H | 0.6460   | -1.3708 | 4.1153  |
| C | -8.2950 | 2.9655  | 3.9354  | C | 4.9127  | 0.6840  | -4.5605 | H | -7.4651  | -3.2170 | 0.6795  |
| C | -6.9813 | 2.6683  | 3.2064  | C | 4.8806  | 1.0462  | -3.2151 | H | -6.3923  | -2.8506 | -0.6486 |
| C | -7.1752 | 1.9314  | 1.8666  | C | 3.8857  | 2.3741  | -1.2806 | H | 3.9114   | -0.5725 | 1.8560  |
| O | -8.0544 | 2.3715  | 1.0830  | O | 2.6101  | 2.8283  | -0.8544 | H | -5.4944  | -3.0601 | 4.5098  |
| O | -6.3963 | 0.9507  | 1.6332  | C | 4.3054  | 1.2229  | -0.3303 | C | -11.1520 | -4.8543 | 1.6351  |
| H | -8.1606 | 3.6929  | 4.7428  | O | 5.5605  | 1.0613  | -0.2285 | C | -10.0945 | -4.2984 | 0.7058  |
| H | -9.0341 | 3.3490  | 3.2323  | O | 3.4219  | 0.5573  | 0.2486  | O | -8.9050  | -4.2894 | 1.0390  |
| H | -6.2951 | 2.0936  | 3.8339  | H | 3.2528  | 6.3925  | -2.7856 | C | -11.2478 | -3.9315 | 2.8537  |
| H | -6.4724 | 3.6133  | 2.9655  | H | 2.0516  | 6.9650  | -3.9625 | N | -10.5334 | -3.7637 | -0.4537 |
| C | -0.8265 | 2.1103  | 5.4380  | H | -1.0553 | 5.4039  | -1.0547 | C | -9.6381  | -3.0775 | -1.3679 |
| C | -0.8071 | 1.5625  | 4.0117  | H | -1.8360 | 6.9843  | -1.1432 | C | -8.8027  | 7.2085  | 3.0265  |
| C | 0.4558  | 1.9053  | 3.2915  | H | -3.9762 | 2.7063  | -3.8032 | C | -8.7004  | 5.9230  | 2.2173  |

C -8.4378 6.1513 0.7290  
N -8.1951 5.0087 0.0366  
O -8.4510 7.2682 0.2162  
H -10.2695 -3.8463 3.3318  
H -11.9620 -4.3175 3.5866  
H -11.5703 -2.9272 2.5616  
H -12.1223 -4.9497 1.1349  
H -8.7883 -3.7205 -1.6128  
H -7.9062 5.2825 2.6099  
H -9.6223 5.3356 2.3070  
H -8.1916 4.0777 0.4699  
H -8.0291 5.0961 -0.9543  
H -9.5888 7.8562 2.6301  
H -9.0223 6.9879 4.0758  
H -7.8680 7.7744 2.9802  
H -10.8337 -5.8549 1.9424  
H -9.2516 -2.1467 -0.9395  
H -10.1771 -2.8438 -2.2866  
H -11.5243 -3.7486 -0.6348  
H 4.6330 3.1693 -1.1477  
H 2.3102 3.6271 -1.3304

## YI

C 11.3606 5.3381 -0.5581  
C 10.9679 4.0679 -1.3238  
C 9.7680 3.3876 -0.7364  
C 8.5864 3.0289 -1.3492  
N 9.7388 3.0114 0.5931  
C 8.5609 2.4345 0.7707  
N 7.8225 2.4251 -0.3747  
H 10.5635 6.0872 -0.6124  
H 11.8190 3.3731 -1.3129  
H 10.7718 4.3021 -2.3772  
H 8.2296 3.1503 -2.3610  
H 8.1926 1.9790 1.6803  
H 6.9046 1.9690 -0.4806  
C -9.4022 1.8812 -4.7516  
C -8.1049 2.5914 -4.3316  
C -7.1741 1.6743 -3.5729  
C -6.4278 0.6997 -4.2492  
C -7.0764 1.7188 -2.1780  
C -5.6224 -0.2020 -3.5629  
C -6.2688 0.8287 -1.4700  
C -5.5393 -0.1415 -2.1669  
O -4.7525 -1.0615 -1.5419  
H -9.9403 1.5131 -3.8720  
H -8.3510 3.4622 -3.7131  
H -7.6004 2.9773 -5.2265  
H -6.4774 0.6479 -5.3345  
H -7.6506 2.4558 -1.6220  
H -5.0404 -0.9528 -4.0860  
H -6.2059 0.8990 -0.3905  
H -4.7105 -0.8904 -0.5630  
C -0.1666 -6.9231 -4.7119  
C -0.3097 -6.6759 -3.2064  
C -1.6764 -6.2216 -2.7203  
C -1.9077 -6.0801 -1.3443  
C -2.7275 -5.8917 -3.5841  
C -3.1209 -5.6128 -0.8473  
C -3.9506 -5.4226 -3.1032  
C -4.1519 -5.2717 -1.7304  
O -5.3708 -4.8162 -1.3077  
H -0.3556 -6.0143 -5.2915  
H -0.0330 -7.5909 -2.6666  
H 0.4324 -5.9262 -2.9002  
H -1.1154 -6.3288 -0.6441  
H -2.5940 -5.9867 -4.6566  
H -3.2623 -5.4967 0.2243  
H -4.7524 -5.1525 -3.7820  
H -5.3130 -4.5052 -0.3901  
C 5.0593 -4.5168 -5.1392  
C 5.2203 -5.2968 -3.8519  
O 6.2073 -5.9915 -3.6102  
C 4.7529 -3.0256 -4.9209  
H 5.9939 -4.6419 -5.6903  
H 5.4650 -2.5747 -4.2255

H 3.7523 -2.8497 -4.5143  
H 4.8063 -2.4796 -5.8674  
N 4.1843 -5.1774 -2.9829  
C 4.3276 -5.6430 -1.6170  
C 3.0368 -5.4675 -0.8251  
C 2.4312 -4.0518 -0.8239  
C 1.1966 -4.0467 0.0773  
C 3.4348 -2.9659 -0.4111  
H 3.4958 -4.4610 -3.1560  
H 5.1553 -5.1137 -1.1333  
H 3.2433 -5.7601 0.2124  
H 2.2823 -6.1710 -1.2027  
H 2.0781 -3.8160 -1.8403  
H 1.4801 -4.1879 1.1269  
H 0.6451 -3.1119 0.0044  
H 0.5009 -4.8464 -0.1964  
H 4.2976 -2.9233 -1.0831  
H 3.8117 -3.1523 0.6009  
H 2.9776 -1.9723 -0.4193  
C 9.2284 -5.3707 -0.2555  
C 7.8605 -4.7669 -0.6049  
C 7.9576 -3.3771 -1.1949  
C 7.8241 -3.1555 -2.5718  
C 8.2044 -2.2779 -0.3643  
C 7.9187 -1.8617 -3.0936  
C 8.2869 -0.9853 -0.8777  
C 8.1412 -0.7725 -2.2492  
H 9.7656 -4.7390 0.4593  
H 7.2534 -4.7220 0.3090  
H 7.3339 -5.4208 -1.3053  
H 7.6369 -4.0016 -3.2259  
H 8.3222 -2.4379 0.7032  
H 7.8211 -1.7080 -4.1656  
H 8.4485 -0.1473 -0.2104  
H 8.2060 0.2356 -2.6464  
C -2.5646 0.7263 0.4020  
C -1.4096 0.8493 -0.3354  
C -1.2271 2.0901 -1.0150  
N -0.0867 2.4007 -1.6314  
N -2.2201 3.0222 -1.0167  
C -3.3122 2.7841 -0.2872  
N -3.5236 1.6829 0.4467  
S 1.5013 -1.0447 -3.5651  
C 1.2164 -0.1434 -2.1197  
C -4.3717 3.8470 -0.2585  
N 0.1488 -0.7174 -1.5334  
C -0.4817 -1.8209 -2.1523  
C -1.7155 -2.4252 -1.5683  
C 0.1575 -2.1533 -3.3054  
C -0.1799 -3.2226 -4.2922  
C -0.3030 -0.1608 -0.2386  
H 0.6983 1.7365 -1.6813  
H 0.0917 3.3690 -1.8733  
H -0.6059 -0.9789 0.4150  
H 0.5875 0.3112 0.1822  
H -5.3585 3.3898 -0.3087  
H -4.3176 4.4022 0.6848  
H -4.2375 4.5503 -1.0809  
H -2.7447 -0.1526 1.0125  
H -1.5744 -2.7198 -0.5252  
H -2.0018 -3.3120 -2.1314  
H -2.5534 -1.7236 -1.6121  
H -0.9967 -3.8464 -3.9267  
H 0.6794 -3.8746 -4.4867  
C 1.6149 -2.3683 7.6192  
C 0.8488 -1.0418 7.7217  
C 1.4546 0.0659 6.8770  
O 1.3453 -0.1782 5.5678  
O 1.9628 1.0721 7.3371  
C -8.4717 2.9102 3.7155  
C -6.9431 2.9515 3.6614  
C -6.3576 2.4322 2.3561  
O -6.9495 2.5363 1.2794  
O -5.1628 1.9145 2.5117  
H -8.8554 3.5458 4.5183  
H -8.8984 3.2401 2.7695  
H -6.4854 2.4072 4.4911

H -6.5873 3.9875 3.7493  
C -1.0104 2.2681 5.3532  
C -0.9998 1.6307 3.9639  
C 0.2526 1.9642 3.2234  
C 0.4164 2.5836 2.0101  
N 1.5088 1.6601 3.7376  
C 2.3929 2.0713 2.8354  
N 1.7747 2.6507 1.7836  
H -0.1167 2.0125 5.9236  
H -1.1031 0.5445 4.0523  
H -1.8660 1.9650 3.3827  
H -0.2985 2.9843 1.3120  
H 3.4613 1.9357 2.8842  
H 2.2069 2.8361 0.8687  
C 5.2991 7.3064 2.7355  
C 5.2283 6.0164 3.5624  
C 5.7627 4.7456 2.8721  
C 5.6983 3.5563 3.8429  
C 5.0073 4.4269 1.5756  
H 4.6666 7.2507 1.8440  
H 4.1853 5.8339 3.8585  
H 5.7854 6.1624 4.4973  
H 6.8178 4.9133 2.6106  
H 4.6738 3.4146 4.2090  
H 6.0202 2.6211 3.3731  
H 6.3324 3.7287 4.7197  
H 3.9327 4.3336 1.7669  
H 5.3641 3.4861 1.1478  
H 5.1447 5.2062 0.8190  
H -0.4863 -2.7937 -5.2535  
H -8.8234 1.8892 3.8960  
H 11.5177 5.0982 0.4965  
H 12.2786 5.7823 -0.9595  
H -10.0674 2.5537 -5.3041  
H -9.1821 1.0187 -5.3892  
H -1.0409 3.3604 5.2762  
H -1.8878 1.9452 5.9236  
H 6.3242 7.5052 2.4016  
H 4.9657 8.1683 3.3232  
H -0.1848 -1.1846 7.3830  
H 0.8221 -0.6845 8.7537  
H 1.7143 -2.6854 6.5771  
H 1.1011 -3.1551 -8.1798  
H 2.6253 -2.2647 8.0257  
H 9.1183 -6.3670 0.1859  
H 9.8519 -5.4621 -1.1510  
H 4.6156 -6.6984 -1.6431  
H 0.8485 -7.2580 -4.9429  
H -0.8641 -7.6926 -5.0593  
H 4.2635 -4.9775 -5.7398  
H 1.5711 0.6401 4.9681  
H -4.6647 1.7116 1.6314  
C 2.1524 6.7738 -3.1477  
C 1.0004 6.1576 -2.3971  
O 1.1064 5.0445 -1.8602  
N -0.1319 6.8947 -2.3463  
C -1.4159 6.3034 -1.9972  
C -2.1236 5.9856 -3.3209  
O -2.1154 6.8218 -4.2284  
N -2.6705 4.7627 -3.4060  
C -3.2502 4.2738 -4.6522  
C -3.3333 2.7462 -4.6306  
C -1.9747 2.0283 -4.5442  
C -2.1635 0.5492 -4.1988  
C -1.1403 2.1875 -5.8205  
C 3.8675 1.9366 -2.7180  
C 2.9358 2.4691 -3.6161  
C 2.9456 2.0942 -4.9595  
C 3.8912 1.1827 -5.4292  
C 4.8259 0.6516 -4.5396  
C 4.8170 1.0236 -3.1959  
C 3.8901 2.3962 -1.2630  
O 2.6642 2.9778 -0.8396  
C 4.2573 1.2607 -0.2759  
O 5.5038 0.9916 -0.2505  
O 3.3765 0.7288 0.4239  
H 3.0390 6.7728 -2.5084

H 2.3771 6.1428 -4.0131  
H -1.2585 5.4229 -1.3758  
H -2.0097 7.0308 -1.4348  
H -3.9579 2.4396 -3.7822  
H -3.8685 2.4136 -5.5295  
H -1.4015 2.4759 -3.7273  
H -0.1715 1.6905 -5.7039  
H -1.6498 1.7363 -6.6816  
H -0.9475 3.2387 -6.0588  
H -2.7575 0.0383 -4.9671  
H -2.6834 0.4253 -3.2445  
H -1.1990 0.0420 -4.1267  
H -2.6384 4.6420 -5.4811  
H 2.1835 3.1687 -3.2703  
H 2.2044 2.5107 -5.6361  
H 3.8956 0.8859 -6.4741  
H 5.5678 -0.0620 -4.8847  
H 5.5361 0.5921 -2.5092  
C -5.1315 -3.0307 3.5874  
C -3.7465 -2.4281 3.8413  
O -3.5989 -1.2279 4.0589  
C -6.0782 -2.0415 2.8820  
C -5.6983 -1.8541 1.4266  
N -6.2645 -2.6998 0.5234  
O -4.8625 -1.0047 1.0915  
N -2.7086 -3.3050 3.9012  
C -1.3665 -2.8260 4.1953  
C -0.6836 -2.2550 2.9446  
O -1.0576 -2.5684 1.8091  
C -0.6234 -4.1122 4.6093  
C -1.2503 -5.1625 3.6778  
C -2.7252 -4.7327 3.5590  
N 0.3885 -1.4979 3.2304  
C 1.5016 -1.2792 2.3308  
C 2.7740 -1.8296 2.9797  
O 2.7439 -2.8223 3.7104  
N 3.8958 -1.1320 2.6886  
C 5.2000 -1.5912 3.1397  
C 5.5798 -1.1886 4.5729  
O 6.5474 -1.7236 5.1108  
C 6.2877 -1.0522 2.2025  
O 6.2794 0.3622 2.1753  
N 4.8545 -0.2015 5.1453  
C 5.2683 0.4097 6.3952  
H -7.1060 -2.4100 2.9513  
H -5.9895 -1.0667 3.3654  
H -5.0709 -3.9617 3.0184  
H -0.8419 -4.3367 5.6588  
H 0.4577 -4.0151 4.4854  
H -1.1485 -6.1845 4.0508  
H -0.7760 -5.1058 2.6952  
H -3.3676 -5.2885 4.2540  
H -3.1035 -4.8897 2.5434  
H -1.4004 -2.0705 4.9835  
H 1.6178 -0.2282 2.0766  
H 1.3169 -1.8301 1.4113  
H 7.2494 -1.4172 2.5806  
H 6.1273 -1.4549 1.1961  
H 5.9735 0.6143 1.2672  
H 5.2200 -2.6853 3.1283  
H 6.0150 1.1966 6.2281  
H 1.9538 7.7924 -3.4864  
H -4.2513 4.7026 -4.7884  
H -2.5342 4.1169 -2.6206  
H -0.2221 7.6363 -3.0317  
H 5.7198 -0.3605 7.0225  
H 4.3976 0.8386 6.8944  
H 4.1080 0.2073 4.6053  
H 0.5931 -1.3083 4.2079  
H -7.1346 -3.1881 0.7418  
H -6.0613 -2.5033 -0.4531  
H 3.8505 -0.4217 1.9482  
H -5.5533 -3.2910 4.5661  
C -10.7553 -5.0996 1.8794  
C -9.8285 -4.4033 0.9000  
O -8.6966 -4.0444 1.2382  
C -11.2783 -4.0841 2.9033

N -10.3438 -4.1513 -0.3244  
C -9.6258 -3.3868 -1.3305  
C -9.0466 7.0981 2.6118  
C -8.6996 5.8269 1.8473  
C -8.2766 6.0767 0.3999  
N -7.7446 4.9824 -0.2140  
O -8.4328 7.1548 -0.1621  
H -10.4409 -3.6010 3.4126  
H -11.9053 -4.5731 3.6538  
H -11.8744 -3.3059 2.4163  
H -11.5873 -5.5885 1.3600  
H -8.6604 -3.8531 -1.5497  
H -7.8989 5.2765 2.3497  
H -9.5611 5.1482 1.8246  
H -7.5304 4.1276 0.2923  
H -7.3960 5.0954 -1.1535  
H -9.8121 7.6679 2.0802  
H -9.4132 6.8585 3.6145  
H -8.1716 7.7467 2.7103  
H -10.1737 -5.8769 2.3828  
H -9.4401 -2.3623 -0.9924  
H -10.2190 -3.3577 -2.2448  
H -11.2843 -4.4538 -0.5211  
H 4.6959 3.1362 -1.1583  
H 2.4781 3.8175 -1.2942

### YIH<sup>+</sup>

C 11.4444 5.2448 -0.5884  
C 10.9429 4.0426 -1.3992  
C 9.7475 3.3791 -0.7838  
C 8.5141 3.1263 -1.3448  
N 9.7796 2.8972 0.5119  
C 8.5865 2.3607 0.7176  
N 7.7805 2.4800 -0.3734  
H 10.6844 6.0325 -0.5491  
H 11.7575 3.3100 -1.4823  
H 10.6972 4.3500 -2.4231  
H 8.1059 3.3412 -2.3210  
H 8.2509 1.8492 1.6100  
H 6.8579 2.0321 -0.4742  
C -9.4086 2.1319 -4.5995  
C -8.1833 2.7363 -3.8913  
C -7.2666 1.6896 -3.2957  
C -6.5641 0.8036 -4.1260  
C -7.1070 1.5503 -1.9130  
C -5.7460 -0.1886 -3.5992  
C -6.2823 0.5655 -1.3638  
C -5.5983 -0.3128 -2.2115  
O -4.7929 -1.3162 -1.7603  
H -10.0090 1.5458 -3.8963  
H -8.5190 3.4156 -3.0993  
H -7.6270 3.3516 -4.6115  
H -6.6561 0.8945 -5.2061  
H -7.6250 2.2094 -1.2228  
H -5.2000 -0.8718 -4.2409  
H -6.1764 0.5053 -0.2852  
H -4.6400 -1.2650 -0.7795  
C -0.2841 -6.7838 -4.8571  
C -0.4350 -6.5930 -3.3445  
C -1.7999 -6.1375 -2.8564  
C -2.0604 -6.0861 -1.4794  
C -2.8252 -5.7308 -3.7192  
C -3.2834 -5.6469 -0.9798  
C -4.0561 -5.2875 -3.2360  
C -4.2926 -5.2435 -1.8615  
O -5.5273 -4.8349 -1.4389  
H -0.4432 -5.8481 -5.4015  
H -0.1798 -7.5335 -2.8394  
H 0.3166 -5.8691 -3.0019  
H -1.2873 -6.3925 -0.7802  
H -2.6677 -5.7519 -4.7923  
H -3.4534 -5.6125 0.0936  
H -4.8400 -4.9640 -3.9120  
H -5.5100 -4.6513 -0.4873  
C 4.9661 -4.4332 -5.2976  
C 5.1777 -5.1763 -3.9998

O 6.2368 -5.7374 -3.7217  
C 5.5892 -3.0297 -5.2667  
H 5.4292 -5.0253 -6.0926  
H 6.6710 -3.0951 -5.1310  
H 5.1790 -2.4299 -4.4493  
H 5.3913 -2.5021 -6.2045  
N 4.1167 -5.1501 -3.1534  
C 4.2623 -5.6245 -1.7912  
C 2.9595 -5.5160 -1.0101  
C 2.3300 -4.1112 -0.9548  
C 1.1248 -4.1519 -0.0149  
C 3.3273 -3.0194 -0.5425  
H 3.3550 -4.5199 -3.3556  
H 5.0485 -5.0536 -1.2862  
H 3.1654 -5.8461 0.0160  
H 2.2218 -6.2188 -1.4210  
H 1.9464 -3.8529 -1.9545  
H 1.4459 -4.3331 1.0177  
H 0.5669 -3.2186 -0.0245  
H 0.4251 -4.9458 -0.2968  
H 4.1751 -2.9478 -1.2311  
H 3.7297 -3.2192 0.4570  
H 2.8558 -2.0329 -0.5220  
C 9.1823 -5.4410 -0.4842  
C 7.8352 -4.7194 -0.6171  
C 7.9796 -3.2724 -1.0346  
C 7.5720 -2.8569 -2.3067  
C 8.5428 -2.3228 -0.1717  
C 7.7097 -1.5241 -2.7006  
C 8.6826 -0.9918 -0.5605  
C 8.2622 -0.5868 -1.8292  
H 9.8249 -4.9523 0.2555  
H 7.3031 -4.7722 0.3423  
H 7.2272 -5.2468 -1.3571  
H 7.1653 -3.5971 -2.9859  
H 8.8627 -2.6278 0.8213  
H 7.3876 -1.2185 -3.6923  
H 9.1059 -0.2639 0.1229  
H 8.3688 0.4507 -2.1252  
C -2.6462 0.6703 0.4716  
C -1.4827 0.8535 -0.2212  
C -1.3072 2.1276 -0.8581  
N -0.1529 2.4768 -1.4060  
N -2.3238 3.0413 -0.8739  
C -3.4397 2.7705 -0.2145  
N -3.6175 1.6257 0.4739  
S 1.4351 -0.8646 -3.5205  
C 1.1097 0.0004 -2.0652  
C -4.5429 3.7792 -0.1922  
N 0.0830 -0.6422 -1.4757  
C -0.4978 -1.7658 -2.1093  
C -1.7135 -2.4242 -1.5462  
C 0.1513 -2.0439 -3.2711  
C -0.1296 -3.1220 -4.2661  
C -0.3618 -0.1438 -0.1568  
H 0.6258 1.7972 -1.5236  
H 0.0010 3.4379 -1.6963  
H -0.6480 -0.9894 0.4683  
H 0.5216 0.3280 0.2778  
H -5.5180 3.2960 -0.1191  
H -4.4340 4.4228 0.6881  
H -4.4869 4.4108 -1.0794  
H -2.8619 -0.2190 1.0520  
H -1.6067 -2.6634 -0.4860  
H -1.9221 -3.3515 -2.0782  
H -2.5872 -1.7782 -1.6661  
H -0.9582 -3.7491 -3.9349  
H 0.7436 -3.7683 -4.4154  
C 1.7015 -2.5125 7.5440  
C 0.9727 -1.1707 7.7012  
C 1.5696 -0.0636 6.8512  
O 1.4374 -0.3035 5.5425  
O 2.0908 0.9391 7.3039  
C -8.3642 2.9705 3.8753  
C -6.8821 2.7581 3.5497  
C -6.5912 2.2242 2.1360  
O -7.2493 2.6865 1.1705

O -5.6401 1.3782 2.0468  
H -8.4958 3.6009 4.7604  
H -8.8746 3.4341 3.0322  
H -6.3991 2.1001 4.2765  
H -6.3544 3.7214 3.6080  
C -0.8925 2.2026 5.4079  
C -0.8962 1.5571 4.0226  
C 0.3422 1.8978 3.2629  
C 0.4819 2.5640 2.0720  
N 1.6075 1.5621 3.7319  
C 2.4727 1.9998 2.8247  
N 1.8347 2.6272 1.8126  
H 0.0072 1.9466 5.9698  
H -0.9925 0.4710 4.1156  
H -1.7712 1.8860 3.4514  
H -0.2453 3.0062 1.4130  
H 3.5398 1.8478 2.8405  
H 2.2390 2.8377 0.8914  
C 5.4478 7.2173 2.8196  
C 5.3763 5.9101 3.6182  
C 5.8617 4.6463 2.8811  
C 5.8028 3.4345 3.8238  
C 5.0600 4.3756 1.6012  
H 4.7877 7.1951 1.9466  
H 4.3399 5.7420 3.9443  
H 5.9666 6.0216 4.5372  
H 6.9113 4.7986 2.5900  
H 4.7843 3.2949 4.2067  
H 6.1052 2.5076 3.3255  
H 6.4560 3.5792 4.6916  
H 3.9893 4.3067 1.8228  
H 5.3784 3.4346 1.1450  
H 5.1967 5.1664 0.8564  
H -0.3939 -2.7028 -5.2436  
H -8.8582 2.0120 4.0713  
H 11.6535 4.9354 0.4389  
H 12.3574 5.6688 -1.0213  
H -10.0461 2.9130 -5.0271  
H -9.1021 1.4630 -5.4101  
H -0.9209 3.2944 5.3249  
H -1.7644 1.8852 5.9895  
H 6.4661 7.4037 2.4588  
H 5.1500 8.0717 3.4366  
H -0.0770 -1.2827 7.4022  
H 0.9953 -0.8311 8.7392  
H 1.7481 -2.8156 6.4942  
H 1.1946 -3.2961 8.1151  
H 2.7311 -2.4391 7.9066  
H 9.0426 -6.4828 -0.1760  
H 9.7140 -5.4374 -1.4410  
H 4.6083 -6.6622 -1.8238  
H 0.7237 -7.1364 -5.0939  
H -0.9989 -7.5196 -5.2400  
H 3.8955 -4.3593 -5.5247  
H 1.6684 0.5133 4.9491  
H -4.5283 1.4844 1.0688  
C 2.2245 6.8476 -3.0346  
C 1.0520 6.2215 -2.3198  
O 1.1119 5.0651 -1.8731  
N -0.0487 6.9964 -2.1931  
C -1.3472 6.4276 -1.8603  
C -2.0520 6.1201 -3.1884  
O -2.0077 6.9458 -4.1018  
N -2.6469 4.9176 -3.2709  
C -3.2265 4.4463 -4.5251  
C -3.3721 2.9228 -4.5028  
C -2.0462 2.1496 -4.3800  
C -2.3049 0.6719 -4.0748  
C -1.1588 2.3028 -5.6207  
C 3.8173 1.9565 -2.7441  
C 2.8823 2.5059 -3.6288  
C 2.8897 2.1599 -4.9800  
C 3.8339 1.2581 -5.4701  
C 4.7681 0.7059 -4.5930  
C 4.7641 1.0504 -3.2417  
C 3.8520 2.3973 -1.2830  
O 2.6307 2.9814 -0.8436

C 4.2293 1.2477 -0.3149  
O 5.4808 1.0050 -0.2890  
O 3.3537 0.6790 0.3620  
H 3.1147 6.7642 -2.4058  
H 2.4153 6.2749 -3.9470  
H -1.2082 5.5482 -1.2329  
H -1.9306 7.1673 -1.3040  
H -4.0348 2.6411 -3.6744  
H -3.8937 2.6117 -5.4169  
H -1.4876 2.5630 -3.5345  
H -0.2156 1.7648 -5.4815  
H -1.6544 1.8928 -6.5096  
H -0.9166 3.3509 -5.8265  
H -2.8796 0.2004 -4.8808  
H -2.8786 0.5447 -3.1524  
H -1.3654 0.1250 -3.9689  
H -2.5841 4.7851 -5.3433  
H 2.1331 3.1995 -3.2649  
H 2.1485 2.5917 -5.6467  
H 3.8378 0.9844 -6.5211  
H 5.5066 -0.0012 -4.9589  
H 5.4860 0.6073 -2.5646  
C -5.1004 -3.0069 3.5820  
C -3.6798 -2.4746 3.7943  
O -3.4683 -1.2798 3.9897  
C -5.9591 -2.0465 2.7361  
C -5.5775 -2.0727 1.2716  
N -6.3955 -2.7344 0.4220  
O -4.5360 -1.5300 0.8651  
N -2.6796 -3.3956 3.8600  
C -1.3220 -2.9596 4.1494  
C -0.6477 -2.3477 2.9165  
O -1.0309 -2.6242 1.7746  
C -0.6006 -4.2785 4.4933  
C -1.2695 -5.2750 3.5326  
C -2.7369 -4.8095 3.4663  
N 0.4312 -1.6029 3.2111  
C 1.5312 -1.3662 2.2996  
C 2.8145 -1.9274 2.9185  
O 2.7957 -2.9315 3.6328  
N 3.9320 -1.2257 2.6191  
C 5.2446 -1.6933 3.0387  
C 5.6518 -1.3137 4.4715  
O 6.6292 -1.8579 4.9815  
C 6.3167 -1.1427 2.0900  
O 6.3049 0.2724 2.0894  
N 4.9362 -0.3397 5.0788  
C 5.3744 0.2458 6.3341  
H -7.0150 -2.3088 2.8463  
H -5.7969 -1.0193 3.0758  
H -5.1076 -4.0100 3.1486  
H -0.8043 -4.5421 5.5366  
H 0.4801 -4.1979 4.3545  
H -1.1819 -6.3135 3.8611  
H -0.8159 -5.1871 2.5427  
H -3.3726 -5.3784 4.1569  
H -3.1436 -4.9172 2.4555  
H -1.3246 -2.2398 4.9714  
H 1.6450 -0.3104 2.0645  
H 1.3316 -1.8999 1.3722  
H 7.2842 -1.5132 2.4436  
H 6.1447 -1.5310 1.0797  
H 5.9888 0.5458 1.1916  
H 5.2612 -2.7873 3.0119  
H 6.1305 1.0242 6.1702  
H 2.0626 7.8957 -3.2931  
H -4.2058 4.9154 -4.6808  
H -2.5594 4.2720 -2.4839  
H -0.1149 7.7930 -2.8147  
H 5.8220 -0.5406 6.9440  
H 4.5154 0.6790 6.8493  
H 4.1828 0.0844 4.5606  
H 0.6479 -1.4370 4.1901  
H -7.3010 -3.1079 0.7077  
H -6.1868 -2.6566 -0.5684  
H 3.8747 -0.5025 1.8937  
H -5.5500 -3.0906 4.5786

C -10.9009 -4.9686 1.8477  
C -9.9362 -4.3014 0.8887  
O -8.7816 -4.0347 1.2365  
C -11.2676 -3.9702 2.9510  
N -10.4338 -3.9599 -0.3200  
C -9.6573 -3.2040 -1.2871  
C -8.8999 7.1874 2.8667  
C -8.6111 5.9505 2.0278  
C -8.2345 6.2625 0.5797  
N -7.7275 5.1922 -0.0864  
O -8.3955 7.3689 0.0717  
H -10.3617 -3.6168 3.4487  
H -11.9184 -4.4320 3.6988  
H -11.7883 -3.1012 2.5369  
H -11.7980 -5.3276 1.3308  
H -8.7675 -3.7631 -1.5946  
H -7.8141 5.3481 2.4726  
H -9.4922 5.2974 1.9981  
H -7.5983 4.2851 0.3684  
H -7.4908 5.3129 -1.0590  
H -9.6726 7.7995 2.3953  
H -9.2324 6.9059 3.8706  
H -8.0080 7.8137 2.9632  
H -10.3929 -5.8367 2.2775  
H -9.3302 -2.2478 -0.8673  
H -10.2732 -3.0119 -2.1659  
H -11.3903 -4.1930 -0.5328  
H 4.6595 3.1357 -1.1773  
H 2.4548 3.8299 -1.2858

## TC

C 11.5532 5.4308 -0.6779  
C 11.1733 4.1845 -1.4904  
C 9.9802 3.4685 -0.9322  
C 8.7773 3.1848 -1.5413  
N 9.9771 2.9815 0.3622  
C 8.7934 2.4129 0.5216  
N 8.0289 2.5084 -0.6030  
H 10.7469 6.1716 -0.7028  
H 12.0315 3.4989 -1.5059  
H 10.9745 4.4585 -2.5338  
H 8.4010 3.3945 -2.5313  
H 8.4311 1.9061 1.4067  
H 7.0776 2.1309 -0.6921  
C -9.2409 1.9188 -4.6653  
C -7.8068 2.2711 -4.2385  
C -7.0878 1.1126 -3.5842  
C -6.8027 -0.0493 -4.3160  
C -6.7084 1.1471 -2.2381  
C -6.1614 -1.1350 -3.7335  
C -6.0584 0.0674 -1.6372  
C -5.7689 -1.0779 -2.3901  
O -5.1041 -2.1481 -1.8831  
H -9.8366 1.6130 -3.7989  
H -7.8280 3.1205 -3.5464  
H -7.2447 2.6073 -5.1201  
H -7.0779 -0.0998 -5.3671  
H -6.9190 2.0267 -1.6357  
H -5.9187 -2.0230 -4.3082  
H -5.7543 0.1227 -0.5980  
H -4.7763 -1.9405 -0.9702  
C 0.0201 -6.8583 -4.7308  
C -0.0567 -5.7103 -3.7138  
C -1.4080 -5.5957 -3.0453  
C -1.6037 -6.0135 -1.7263  
C -2.5144 -5.0732 -3.7330  
C -2.8504 -5.9140 -1.1087  
C -3.7653 -4.9643 -3.1331  
C -3.9348 -5.3907 -1.8136  
O -5.1892 -5.2920 -1.2642  
H -0.7236 -6.7290 -5.5240  
H 0.7161 -5.8449 -2.9500  
H 0.1797 -4.7700 -4.2224  
H -0.7661 -6.4148 -1.1641  
H -2.3890 -4.7284 -4.7563  
H -2.9746 -6.2339 -0.0766

|   |         |         |         |   |         |         |         |   |         |         |         |
|---|---------|---------|---------|---|---------|---------|---------|---|---------|---------|---------|
| H | -4.6086 | -4.5257 | -3.6530 | C | -8.2274 | 2.9393  | 3.7935  | C | 4.8555  | 0.5727  | -4.5563 |
| H | -5.1319 | -5.4750 | -0.3167 | C | -8.4837 | 2.3393  | 2.3999  | C | 4.8421  | 0.9930  | -3.2278 |
| C | 5.2346  | -4.4363 | -5.2079 | C | -7.2893 | 2.5013  | 1.4761  | C | 3.9248  | 2.4651  | -1.3567 |
| C | 5.3244  | -5.3085 | -3.9763 | O | -7.3346 | 3.1963  | 0.4559  | C | 2.6317  | 2.9226  | -0.9642 |
| O | 6.0890  | -6.2721 | -3.9165 | O | -6.2190 | 1.8614  | 1.8774  | C | 4.3765  | 1.3664  | -0.3658 |
| C | 4.5043  | -3.0980 | -5.0809 | H | -9.1193 | 2.8470  | 4.4198  | O | 5.6391  | 1.2238  | -0.2895 |
| H | 6.2678  | -4.2671 | -5.5282 | H | -7.4022 | 2.4177  | 4.2843  | O | 3.5250  | 0.7264  | 0.2823  |
| H | 4.9527  | -2.4795 | -4.2978 | H | -9.3436 | 2.8111  | 1.9195  | H | 3.2527  | 6.6901  | -2.6332 |
| H | 3.4394  | -3.2217 | -4.8542 | H | -8.6920 | 1.2679  | 2.4991  | H | 2.4136  | 6.3579  | -4.1482 |
| H | 4.5671  | -2.5378 | -6.0180 | C | -0.7481 | 2.3169  | 5.3543  | H | -1.0025 | 5.3528  | -1.3631 |
| N | 4.4819  | -4.9574 | -2.9820 | C | -0.7448 | 1.7066  | 3.9542  | H | -1.8062 | 6.9391  | -1.3247 |
| C | 4.5419  | -5.5695 | -1.6805 | C | 0.5016  | 2.0428  | 3.2049  | H | -4.2917 | 2.7882  | -3.7176 |
| C | 3.2069  | -5.4350 | -0.9470 | C | 0.6449  | 2.6842  | 2.0008  | H | -4.0504 | 2.5896  | -5.4418 |
| C | 2.6239  | -4.0087 | -0.9125 | N | 1.7643  | 1.7000  | 3.6773  | H | -1.8307 | 2.2226  | -3.3714 |
| C | 1.3229  | -4.0032 | -0.1131 | C | 2.6320  | 2.1060  | 2.7584  | H | -0.6031 | 1.0668  | -5.1380 |
| C | 3.6135  | -2.9703 | -0.3645 | N | 1.9972  | 2.7229  | 1.7370  | H | -1.9349 | 1.3171  | -6.2868 |
| H | 4.0070  | -4.0722 | -3.0464 | H | 0.1479  | 2.0515  | 5.9162  | H | -0.9963 | 2.6950  | -5.6868 |
| H | 5.3373  | -5.1019 | -1.0888 | H | -0.8580 | 0.6191  | 4.0159  | H | -3.5782 | 0.0699  | -4.6459 |
| H | 3.3471  | -5.7834 | 0.0845  | H | -1.6079 | 2.0615  | 3.3811  | H | -3.6741 | 0.6217  | -2.9772 |
| H | 2.4696  | -6.1054 | -1.4084 | H | -0.0806 | 3.1030  | 1.3236  | H | -2.2118 | -0.1883 | -3.5371 |
| H | 2.3590  | -3.7158 | -1.9406 | H | 3.6972  | 1.9404  | 2.7750  | H | -2.3911 | 4.4729  | -5.4528 |
| H | 1.5016  | -4.2611 | 0.9360  | H | 2.3900  | 2.9130  | 0.8071  | H | 2.3815  | 3.3262  | -3.4411 |
| H | 0.8504  | -3.0226 | -0.1376 | C | 5.5198  | 7.3770  | 2.6798  | H | 2.4090  | 2.5825  | -5.7848 |
| H | 0.6014  | -4.7212 | -0.5137 | C | 5.3968  | 6.0762  | 3.4820  | H | 3.9868  | 0.8032  | -6.5186 |
| H | 4.5420  | -2.9239 | -0.9432 | C | 5.9756  | 4.8173  | 2.8072  | H | 5.5485  | -0.2063 | -4.8574 |
| H | 3.8854  | -3.2092 | 0.6701  | C | 5.8868  | 3.6205  | 3.7660  | H | 5.5090  | 0.5317  | -2.5102 |
| H | 3.1785  | -1.9671 | -0.3791 | C | 5.2822  | 4.5006  | 1.4751  | C | -4.8715 | -2.9917 | 3.6232  |
| C | 9.4552  | -5.2845 | -0.3683 | H | 4.9496  | 7.3334  | 1.7462  | C | -3.4797 | -2.3711 | 3.7741  |
| C | 8.0469  | -5.0092 | -0.9203 | H | 4.3379  | 5.8889  | 3.7109  | O | -3.2749 | -1.1701 | 3.5932  |
| C | 7.9293  | -3.6406 | -1.5574 | H | 5.8953  | 6.2088  | 4.4514  | C | -5.8175 | -2.1609 | 2.7387  |
| C | 7.8696  | -3.4906 | -2.9484 | H | 7.0384  | 5.0015  | 2.5920  | C | -5.5250 | -2.3673 | 1.2639  |
| C | 7.9190  | -2.4871 | -0.7611 | H | 4.8494  | 3.4596  | 4.0833  | N | -6.2865 | -3.2635 | 0.6073  |
| C | 7.8022  | -2.2197 | -3.5248 | H | 6.2440  | 2.6942  | 3.3049  | O | -4.5915 | -1.7638 | 0.7053  |
| C | 7.8466  | -1.2164 | -1.3295 | H | 6.4772  | 3.7973  | 4.6719  | N | -2.5059 | -3.2070 | 4.2196  |
| C | 7.7920  | -1.0805 | -2.7189 | H | 4.2027  | 4.3762  | 1.6209  | C | -1.1634 | -2.6955 | 4.4722  |
| H | 9.7342  | -4.5390 | 0.3828  | H | 5.6770  | 3.5767  | 1.0437  | C | -0.4130 | -2.4284 | 3.1604  |
| H | 7.3280  | -5.0899 | -0.0954 | H | 5.4287  | 5.2977  | 0.7389  | O | -0.6827 | -3.0521 | 2.1339  |
| H | 7.7717  | -5.7757 | -1.6525 | H | -0.4658 | -1.3295 | -4.7856 | C | -0.4752 | -3.8586 | 5.2128  |
| H | 7.8737  | -4.3786 | -3.5724 | H | -7.9670 | 3.9975  | 3.7283  | C | -1.1146 | -5.0920 | 4.5588  |
| H | 7.9766  | -2.5895 | 0.3187  | H | 11.7171 | 5.1541  | 0.3669  | C | -2.5734 | -4.6714 | 4.3155  |
| H | 7.7667  | -2.1213 | -4.6068 | H | 12.4646 | 5.9000  | -1.0652 | N | 0.5669  | -1.5128 | 3.2944  |
| H | 7.8298  | -0.3357 | -0.6982 | H | -9.7378 | 2.7724  | -5.1390 | C | 1.6610  | -1.3602 | 2.3604  |
| H | 7.7500  | -0.0912 | -3.1634 | H | -9.2460 | 1.0884  | -5.3786 | C | 2.9643  | -1.8095 | 3.0245  |
| C | -3.2268 | 1.0301  | 0.8642  | H | -0.7795 | 3.4102  | 5.2980  | O | 2.9923  | -2.7390 | 3.8306  |
| C | -1.9812 | 0.8595  | 0.3238  | H | -1.6219 | 1.9844  | 5.9251  | N | 4.0554  | -1.0872 | 2.6633  |
| C | -1.5421 | 1.8433  | -0.6041 | H | 6.5646  | 7.5812  | 2.4186  | C | 5.3900  | -1.5072 | 3.0637  |
| N | -0.3232 | 1.7282  | -1.1656 | H | 5.1457  | 8.2307  | 3.2546  | C | 5.8184  | -1.1032 | 4.4830  |
| N | -2.3230 | 2.9080  | -0.9124 | H | 0.0856  | -1.1907 | 7.2824  | O | 6.8174  | -1.6209 | 4.9782  |
| C | -3.5249 | 2.9884  | -0.3182 | H | 1.0149  | -0.6686 | 8.7002  | C | 6.4212  | -0.9334 | 2.0851  |
| N | -4.0152 | 2.0916  | 0.5461  | H | 2.0996  | -2.5960 | 6.5472  | O | 6.4146  | 0.4815  | 2.1119  |
| S | 1.2570  | -0.0258 | -2.5709 | H | 1.3881  | -3.1334 | 8.0880  | N | 5.0962  | -0.1349 | 5.0910  |
| C | 0.5664  | 0.5470  | -0.9699 | H | 2.8866  | -2.1876 | 8.0707  | C | 5.5461  | 0.4754  | 6.3302  |
| C | -4.3715 | 4.1909  | -0.6276 | H | 9.5080  | -6.2736 | 0.0982  | H | -6.8527 | -2.4459 | 2.9510  |
| N | -0.1817 | -0.5822 | -0.4647 | H | 10.2006 | -5.2431 | -1.1692 | H | -5.6832 | -1.1001 | 2.9624  |
| C | -0.6868 | -1.4004 | -1.5104 | H | 4.8209  | -6.6162 | -1.8183 | H | -4.8086 | -4.0158 | 3.2451  |
| C | -1.8018 | -2.3365 | -1.1886 | H | 1.0102  | -6.9044 | -5.1957 | H | -0.7120 | -3.8093 | 6.2810  |
| C | -0.0332 | -1.2610 | -2.6785 | H | -0.1755 | -7.8213 | -4.2483 | H | 0.6095  | -3.8237 | 5.0921  |
| C | -0.1996 | -2.0027 | -3.9615 | H | 4.7834  | -5.0479 | -5.9992 | H | -1.0412 | -5.9935 | 5.1721  |
| C | -1.0333 | -0.2484 | 0.6757  | H | 1.8339  | 0.7082  | 4.9424  | H | -0.6307 | -5.2815 | 3.5982  |
| H | 1.3993  | 0.8216  | -0.3234 | H | -5.3762 | 2.0506  | 1.2646  | H | -3.2280 | -4.9751 | 5.1437  |
| H | 0.0514  | 2.5085  | -1.6908 | C | 2.3150  | 6.8430  | -3.1719 | H | -2.9652 | -5.1081 | 3.3921  |
| H | -1.5582 | -1.1347 | 1.0232  | C | 1.1899  | 6.1692  | -2.4182 | H | -1.2193 | -1.7803 | 5.0669  |
| H | -0.3831 | 0.0769  | 1.4902  | O | 1.2916  | 5.0188  | -1.9710 | H | 1.7439  | -0.3298 | 2.0134  |
| H | -4.4353 | 4.3498  | -1.7060 | N | 0.0590  | 6.9004  | -2.2717 | H | 1.4584  | -1.9856 | 1.4931  |
| H | -5.3746 | 4.0703  | -0.2206 | C | -1.2038 | 6.2584  | -1.9341 | H | 7.4042  | -1.3137 | 2.3860  |
| H | -3.9087 | 5.0878  | -0.1998 | C | -1.9300 | 5.9834  | -3.2564 | H | 6.1922  | -1.2994 | 1.0777  |
| H | -3.6248 | 0.3127  | 1.5753  | O | -1.9606 | 6.8550  | -4.1284 | H | 6.1072  | 0.7774  | 1.2198  |
| H | -1.5413 | -2.9760 | -0.3398 | N | -2.4579 | 4.7564  | -3.3842 | H | 5.4444  | -2.6006 | 3.0449  |
| H | -2.0467 | -2.9685 | -2.0392 | C | -3.0951 | 4.3293  | -4.6251 | H | 6.2849  | 1.2648  | 6.1423  |
| H | -2.6997 | -1.7811 | -0.9126 | C | -3.5388 | 2.8703  | -4.5120 | H | 2.1498  | 7.9120  | -3.3202 |
| H | -0.9856 | -2.7544 | -3.8743 | C | -2.4075 | 1.8634  | -4.2298 | H | -3.9535 | 4.9784  | -4.8326 |
| H | 0.7298  | -2.5121 | -4.2508 | C | -2.9975 | 0.5110  | -3.8282 | H | -2.3326 | 4.0853  | -2.6239 |
| C | 1.9134  | -2.3148 | 7.5874  | C | -1.4316 | 1.7305  | -5.4036 | H | -0.0553 | 7.6922  | -2.8933 |
| C | 1.0973  | -1.0157 | 7.6677  | C | 3.9535  | 1.9894  | -2.8067 | H | 6.0183  | -0.2943 | 6.9429  |
| C | 1.7105  | 0.1116  | 6.8553  | C | 3.0895  | 2.5636  | -3.7466 | H | 4.6883  | 0.8996  | 6.8548  |
| O | 1.5921  | -0.1009 | 5.5403  | C | 3.1019  | 2.1396  | -5.0748 | H | 4.3210  | 0.2621  | 4.5835  |
| O | 2.2353  | 1.0982  | 7.3367  | C | 3.9819  | 1.1388  | -5.4855 | H | 0.7477  | -1.1528 | 4.2276  |

H -7.1310 -3.6846 0.9871  
H -6.0996 -3.4047 -0.3816  
H 3.9703 -0.4261 1.8857  
H -5.2941 -3.0663 4.6334  
C -11.0065 -5.0018 1.7905  
C -9.9190 -4.5375 0.8429  
O -8.7284 -4.6325 1.1559  
C -11.0219 -4.0621 3.0001  
N -10.3362 -3.9630 -0.3067  
C -9.4145 -3.3544 -1.2493  
C -8.8259 7.1270 2.7010  
C -9.0592 5.8148 1.9635  
C -9.7795 5.9904 0.6272  
N -9.5382 4.9899 -0.2636  
O -10.5464 6.9222 0.4061  
H -10.0357 -4.0465 3.4696  
H -11.7561 -4.3856 3.7432  
H -11.2721 -3.0397 2.6993  
H -11.9869 -5.0288 1.3019  
H -8.6011 -4.0478 -1.4769  
H -8.1226 5.2747 1.8005  
H -9.6924 5.1566 2.5724  
H -8.7974 4.3079 -0.1099  
H -9.9721 5.0657 -1.1709  
H -9.7631 7.6803 2.7933  
H -8.4185 6.9461 3.7007  
H -8.1218 7.7646 2.1578  
H -10.7612 -6.0201 2.1058  
H -8.9711 -2.4350 -0.8524  
H -9.9472 -3.1199 -2.1713  
H -11.3269 -3.8795 -0.4703  
H 4.6489 3.2834 -1.2399  
H 2.4096 3.7727 -1.3923

TCH<sup>+</sup>

C 11.5562 5.2098 -0.4982  
C 11.1539 3.9132 -1.2150  
C 9.9204 3.2883 -0.6359  
C 8.7080 3.0427 -1.2444  
N 9.8781 2.8646 0.6795  
C 8.6625 2.3691 0.8507  
N 7.9122 2.4609 -0.2823  
H 10.7765 5.9713 -0.6058  
H 11.9847 3.1985 -1.1471  
H 10.9934 4.1053 -2.2829  
H 8.3506 3.2275 -2.2462  
H 8.2718 1.9092 1.7490  
H 6.9763 2.0523 -0.3979  
C -9.3491 2.4641 -4.5051  
C -8.1076 2.8731 -3.6916  
C -7.2826 1.6944 -3.2173  
C -6.7441 0.7853 -4.1405  
C -7.0394 1.4581 -1.8584  
C -6.0068 -0.3191 -3.7298  
C -6.2964 0.3564 -1.4271  
C -5.7730 -0.5419 -2.3660  
O -5.0470 -1.6407 -2.0267  
H -10.0086 1.8268 -3.9073  
H -8.4203 3.4654 -2.8237  
H -7.4862 3.5374 -4.3086  
H -6.9002 0.9466 -5.2044  
H -7.4239 2.1386 -1.1021  
H -5.5850 -1.0147 -4.4480  
H -6.1327 0.2127 -0.3650  
H -4.7909 -1.6174 -1.0684  
C -0.3278 -6.5398 -5.1003  
C -0.4379 -5.8655 -3.7229  
C -1.8515 -5.6468 -3.2211  
C -2.2044 -5.9863 -1.9112  
C -2.8392 -5.0499 -4.0203  
C -3.4846 -5.7469 -1.4112  
C -4.1220 -4.8024 -3.5383  
C -4.4517 -5.1594 -2.2282  
O -5.7410 -4.9439 -1.8087  
H -0.7938 -5.9337 -5.8835  
H 0.1071 -6.4617 -2.9833

H 0.0805 -4.8981 -3.7502  
H -1.4635 -6.4410 -1.2602  
H -2.6027 -4.7613 -5.0403  
H -3.7276 -6.0171 -0.3863  
H -4.8736 -4.3218 -4.1544  
H -5.7938 -5.1202 -0.8585  
C 4.9468 -4.2351 -5.4899  
C 5.1720 -5.0066 -4.2116  
O 6.2374 -5.5686 -3.9563  
C 5.7581 -2.9332 -5.5188  
H 5.2543 -4.8788 -6.3209  
H 6.8274 -3.1504 -5.4694  
H 5.5026 -2.2922 -4.6713  
H 5.5597 -2.3760 -6.4392  
N 4.1139 -5.0118 -3.3660  
C 4.2457 -5.5329 -2.0211  
C 2.9200 -5.4949 -1.2756  
C 2.2668 -4.1052 -1.1739  
C 1.0218 -4.2051 -0.2955  
C 3.2324 -3.0302 -0.6567  
H 3.3422 -4.3908 -3.5563  
H 4.9992 -4.9561 -1.4742  
H 3.1037 -5.8656 -0.2593  
H 2.2141 -6.1973 -1.7397  
H 1.9252 -3.7910 -2.1739  
H 1.2796 -4.5374 0.7156  
H 0.5276 -3.2416 -0.2070  
H 0.2968 -4.9168 -0.7035  
H 4.0986 -2.8983 -1.3130  
H 3.6104 -3.2913 0.3388  
H 2.7357 -2.0599 -0.5865  
C 9.1734 -5.4477 -0.7334  
C 7.8358 -4.7089 -0.8881  
C 8.0150 -3.2671 -1.3079  
C 7.8640 -2.8901 -2.6476  
C 8.3711 -2.2860 -0.3736  
C 8.0547 -1.5627 -3.0369  
C 8.5523 -0.9577 -0.7560  
C 8.3944 -0.5914 -2.0943  
H 9.8090 -4.9605 0.0132  
H 7.2930 -4.7466 0.0653  
H 7.2256 -5.2276 -1.6324  
H 7.5952 -3.6498 -3.3743  
H 8.4969 -2.5670 0.6684  
H 7.9428 -1.2874 -4.0823  
H 8.8070 -0.2062 -0.0170  
H 8.5390 0.4430 -2.3885  
C -3.0372 0.6669 0.7527  
C -1.8186 0.5814 0.1543  
C -1.4669 1.6031 -0.7791  
N -0.2740 1.5467 -1.3842  
N -2.3126 2.6376 -1.0422  
C -3.5062 2.6345 -0.4475  
N -3.8780 1.6854 0.4235  
S 1.1915 -0.1514 -2.9867  
C 0.6416 0.3533 -1.3143  
C -4.5039 3.7048 -0.7646  
N -0.0717 -0.7900 -0.8007  
C -0.6952 -1.5384 -1.8395  
C -1.8534 -2.4102 -1.4838  
C -0.1246 -1.3683 -3.0467  
C -0.3642 -2.0976 -4.3281  
C -0.8157 -0.4931 0.4217  
H 1.5127 0.6085 -0.7126  
H 0.0511 2.3466 -1.9133  
H -1.2808 -1.3979 0.8093  
H -0.1009 -0.1513 1.1716  
H -4.8962 3.5443 -1.7737  
H -5.3378 3.6704 -0.0608  
H -4.0282 4.6873 -0.7444  
H -3.4013 -0.0466 1.4839  
H -1.6053 -3.1081 -0.6800  
H -2.2019 -2.9803 -2.3418  
H -2.6847 -1.7976 -1.1315  
H -1.2063 -2.7849 -4.2305  
H 0.5179 -2.6826 -4.6250  
C 1.7635 -2.7008 7.4239

C 1.0418 -1.3615 7.6390  
C 1.6415 -0.2312 6.8218  
O 1.4259 -0.4011 5.5130  
O 2.2265 0.7261 7.2922  
C -8.2557 3.0120 3.9873  
C -6.9717 2.2700 3.6270  
C -6.6357 2.2503 2.1324  
O -6.9315 3.2362 1.4159  
O -5.9776 1.2272 1.7340  
H -8.3683 3.0997 5.0746  
H -8.2653 4.0105 3.5540  
H -6.9787 1.2365 3.9934  
H -6.1105 2.7583 4.1138  
C -0.7865 2.1106 5.4565  
C -0.8670 1.5099 4.0500  
C 0.3527 1.8043 3.2387  
C 0.4659 2.4432 2.0285  
N 1.6204 1.4083 3.6493  
C 2.4612 1.7842 2.6939  
N 1.8059 2.4271 1.7009  
H 0.1205 1.8028 5.9776  
H -1.0139 0.4259 4.1095  
H -1.7455 1.8975 3.5229  
H -0.2728 2.9017 1.3918  
H 3.5189 1.5776 2.6609  
H 2.1851 2.6363 0.7693  
C 5.5983 7.1362 3.0025  
C 5.3170 5.8307 3.7578  
C 5.7876 4.5403 3.0579  
C 5.5895 3.3313 3.9847  
C 5.0802 4.3077 1.7161  
H 5.0645 7.1741 2.0475  
H 4.2383 5.7467 3.9532  
H 5.7979 5.8819 4.7434  
H 6.8641 4.6376 2.8529  
H 4.5307 3.2184 4.2499  
H 5.9213 2.3992 3.5156  
H 6.1474 3.4554 4.9193  
H 3.9948 4.2356 1.8561  
H 5.4236 3.3754 1.2592  
H 5.2748 5.1151 1.0024  
H -0.5812 -1.4126 -5.1559  
H -9.1368 2.4778 3.6031  
H 11.6857 5.0162 0.5700  
H 12.4922 5.6170 -0.8968  
H -9.9187 3.3430 -4.8245  
H -9.0689 1.9017 -5.4013  
H -0.7765 3.2046 5.4074  
H -1.6492 1.8077 6.0591  
H 6.6676 7.2426 2.7872  
H 5.2861 8.0061 3.5898  
H -0.0100 -1.4569 7.3420  
H 1.0732 -1.0613 8.6888  
H 1.8590 -2.9302 6.3594  
H 1.2246 -3.5142 7.9185  
H 2.7760 -2.6619 7.8362  
H 9.0169 -6.4865 -0.4232  
H 9.7186 -5.4539 -1.6826  
H 4.6280 -6.5561 -2.0867  
H 0.7216 -6.6841 -5.3730  
H -0.8211 -7.5165 -5.0976  
H 3.8818 -4.0151 -5.6274  
H 1.6922 0.3971 4.9191  
H -4.8769 1.6195 0.8897  
C 2.3440 6.9953 -2.8444  
C 1.2761 6.1659 -2.1639  
O 1.4100 4.9510 -1.9697  
N 0.1592 6.8369 -1.7857  
C -1.0722 6.1121 -1.5083  
C -1.8677 6.0702 -2.8199  
O -1.8958 7.0667 -3.5452  
N -2.4541 4.8986 -3.1138  
C -3.1407 4.7054 -4.3857  
C -3.4495 3.2246 -4.6207  
C -2.2499 2.2678 -4.4976  
C -2.7095 0.8191 -4.6758  
C -1.1017 2.6159 -5.4503

|   |         |         |         |   |          |         |         |
|---|---------|---------|---------|---|----------|---------|---------|
| C | 4.0624  | 1.9184  | -2.7547 | H | 5.8523   | -0.7569 | 6.9019  |
| C | 3.2130  | 2.4688  | -3.7212 | H | 4.6362   | 0.5495  | 6.8008  |
| C | 3.3551  | 2.1313  | -5.0672 | H | 4.3955   | 0.0412  | 4.4421  |
| C | 4.3532  | 1.2441  | -5.4660 | H | 0.6256   | -1.4480 | 4.1896  |
| C | 5.2119  | 0.7024  | -4.5076 | H | -7.3441  | -3.3514 | 0.6723  |
| C | 5.0701  | 1.0324  | -3.1614 | H | -6.2647  | -3.0300 | -0.6620 |
| C | 3.9146  | 2.3289  | -1.2918 | H | 3.8606   | -0.7821 | 1.8057  |
| O | 2.5901  | 2.7548  | -0.9776 | H | -5.5131  | -3.0125 | 4.4816  |
| C | 4.3084  | 1.1927  | -0.3190 | C | -11.1553 | -4.7774 | 1.6244  |
| O | 5.5608  | 1.0772  | -0.1383 | C | -10.0924 | -4.2370 | 0.6892  |
| O | 3.4210  | 0.4998  | 0.2202  | O | -8.8964  | -4.2905 | 0.9935  |
| H | 3.3118  | 6.7836  | -2.3843 | C | -11.2424 | -3.8615 | 2.8504  |
| H | 2.4028  | 6.6842  | -3.8918 | N | -10.5371 | -3.6482 | -0.4424 |
| H | -0.8242 | 5.1203  | -1.1324 | C | -9.6430  | -2.9746 | -1.3683 |
| H | -1.6469 | 6.6478  | -0.7462 | C | -8.7485  | 7.2657  | 3.1202  |
| H | -4.2278 | 2.8963  | -3.9198 | C | -8.4506  | 6.1506  | 2.1273  |
| H | -3.8891 | 3.1298  | -5.6224 | C | -8.1000  | 6.6295  | 0.7203  |
| H | -1.8602 | 2.3456  | -3.4784 | N | -7.5607  | 5.6453  | -0.0498 |
| H | -0.2697 | 1.9181  | -5.3094 | O | -8.3020  | 7.7732  | 0.3231  |
| H | -1.4243 | 2.5560  | -6.4974 | H | -10.2635 | -3.7886 | 3.3302  |
| H | -0.7181 | 3.6262  | -5.2737 | H | -11.9596 | -4.2472 | 3.5801  |
| H | -3.0697 | 0.6401  | -5.6970 | H | -11.5566 | -2.8525 | 2.5656  |
| H | -3.5248 | 0.5745  | -3.9899 | H | -12.1281 | -4.8577 | 1.1262  |
| H | -1.8884 | 0.1304  | -4.4724 | H | -8.8383  | -3.6481 | -1.6767 |
| H | -2.5068 | 5.1136  | -5.1792 | H | -7.6356  | 5.5085  | 2.4726  |
| H | 2.4301  | 3.1581  | -3.4263 | H | -9.3219  | 5.4906  | 2.0258  |
| H | 2.6758  | 2.5575  | -5.8002 | H | -7.3774  | 4.7229  | 0.3373  |
| H | 4.4644  | 0.9780  | -6.5133 | H | -7.3128  | 5.8670  | -1.0013 |
| H | 5.9973  | 0.0150  | -4.8036 | H | -9.5329  | 7.9237  | 2.7369  |
| H | 5.7345  | 0.5932  | -2.4256 | H | -9.0708  | 6.8512  | 4.0804  |
| C | -5.0617 | -2.9887 | 3.4817  | H | -7.8636  | 7.8854  | 3.2940  |
| C | -3.6347 | -2.4637 | 3.6578  | H | -10.8498 | -5.7834 | 1.9259  |
| O | -3.3437 | -1.2788 | 3.4868  | H | -9.1871  | -2.0865 | -0.9186 |
| C | -5.9284 | -2.1079 | 2.5638  | H | -10.2066 | -2.6731 | -2.2517 |
| C | -5.5978 | -2.2711 | 1.0914  | H | -11.5308 | -3.6001 | -0.6014 |
| N | -6.4584 | -2.9796 | 0.3334  | H | 4.6172   | 3.1506  | -1.0950 |
| O | -4.5685 | -1.7737 | 0.5998  | H | 2.4090   | 3.6386  | -1.3531 |
| N | -2.7205 | -3.3596 | 4.1156  |   |          |         |         |
| C | -1.3548 | -2.9247 | 4.3863  |   |          |         |         |
| C | -0.5868 | -2.6511 | 3.0871  |   |          |         |         |
| O | -0.8813 | -3.2251 | 2.0367  |   |          |         |         |
| C | -0.7281 | -4.1436 | 5.0922  |   |          |         |         |
| C | -1.4335 | -5.3229 | 4.4077  |   |          |         |         |
| C | -2.8693 | -4.8194 | 4.1920  |   |          |         |         |
| N | 0.4443  | -1.8009 | 3.2536  |   |          |         |         |
| C | 1.5480  | -1.6774 | 2.3277  |   |          |         |         |
| C | 2.8473  | -2.1202 | 2.9993  |   |          |         |         |
| O | 2.8711  | -3.0169 | 3.8406  |   |          |         |         |
| N | 3.9461  | -1.4454 | 2.5800  |   |          |         |         |
| C | 5.2759  | -1.8577 | 3.0018  |   |          |         |         |
| C | 5.6167  | -1.5702 | 4.4705  |   |          |         |         |
| O | 6.4929  | -2.2271 | 5.0277  |   |          |         |         |
| C | 6.3256  | -1.1483 | 2.1358  |   |          |         |         |
| O | 6.2168  | 0.2591  | 2.2580  |   |          |         |         |
| N | 4.9831  | -0.5178 | 5.0415  |   |          |         |         |
| C | 5.4620  | 0.0543  | 6.2867  |   |          |         |         |
| H | -6.9821 | -2.3541 | 2.7270  |   |          |         |         |
| H | -5.7701 | -1.0508 | 2.7978  |   |          |         |         |
| H | -5.0604 | -4.0226 | 3.1242  |   |          |         |         |
| H | -0.9615 | -4.1107 | 6.1617  |   |          |         |         |
| H | 0.3573  | -4.1613 | 4.9741  |   |          |         |         |
| H | -1.4016 | -6.2451 | 4.9932  |   |          |         |         |
| H | -0.9678 | -5.5073 | 3.4370  |   |          |         |         |
| H | -3.5269 | -5.0984 | 5.0267  |   |          |         |         |
| H | -3.3002 | -5.2198 | 3.2699  |   |          |         |         |
| H | -1.3635 | -2.0280 | 5.0113  |   |          |         |         |
| H | 1.6412  | -0.6548 | 1.9583  |   |          |         |         |
| H | 1.3475  | -2.3215 | 1.4731  |   |          |         |         |
| H | 7.3116  | -1.4853 | 2.4765  |   |          |         |         |
| H | 6.1987  | -1.4515 | 1.0903  |   |          |         |         |
| H | 5.9698  | 0.5893  | 1.3577  |   |          |         |         |
| H | 5.3856  | -2.9412 | 2.8885  |   |          |         |         |
| H | 6.2714  | 0.7755  | 6.1134  |   |          |         |         |
| H | 2.1454  | 8.0676  | -2.7990 |   |          |         |         |
| H | -4.0688 | 5.2896  | -4.3996 |   |          |         |         |
| H | -2.3390 | 4.1100  | -2.4752 |   |          |         |         |
| H | -0.0103 | 7.7224  | -2.2494 |   |          |         |         |
